# Supplementary material for: Translating preventive chemotherapy prevalence thresholds for Schistosoma mansoni from the Kato-Katz technique into the point-of-care circulating cathodic antigen diagnostic test
Source: PubMed Central journal article supplement (PMC6310297; doi:10.1371/journal.pntd.0006941), 2018-12-14
Supplement: pntd.0006941.s001.pdf [file pntd.0006941.s001.pdf]

## Supporting information

S1 Table. Posterior means and 95% BCI of model parameters that determine sensitivity estimates.

|                   | Posterior mean | 95% BCI      |
|-------------------|----------------|--------------|
| <b>Kato-Katz</b>  |                |              |
| $\alpha$          | 0.07           | 0.04–0.11    |
| $\gamma_2$        | 5.34           | 3.07–10.10   |
| $\sigma$          | 1.28           | 1.08–1.49    |
| <b>T/1+/2+/3+</b> |                |              |
| $a_0$             | 1.10           | 0.62–1.67    |
| $a_1$             | 3.64           | 1.97–6.25    |
| $a_2$             | 5.58           | 4.55–6.87    |
| <b>1+/2+/3+</b>   |                |              |
| $a_0$             | -1.20          | -1.95– -0.42 |
| $a_1$             | 3.75           | 1.90–6.59    |
| $a_2$             | 3.69           | 2.78–4.68    |
| <b>2+/3+</b>      |                |              |
| $a_0$             | -4.46          | -5.16– -3.74 |
| $a_1$             | 4.34           | 3.47–5.32    |
| $a_2$             | 3.72           | 2.71–4.53    |

Table A: Posterior means and 95% BCI of model parameters that determine sensitivity of POC-CCA and Kato-Katz
