# Supplementary material for: Translating preventive chemotherapy prevalence thresholds for Schistosoma mansoni from the Kato-Katz technique into the point-of-care circulating cathodic antigen diagnostic test
Source: PLoS Negl Trop Dis. 2018 Dec 14;12(12):e0006941. doi: 10.1371/journal.pntd.0006941 (PMC6310297; doi:10.1371/journal.pntd.0006941)
Supplement: S2 Table — (XLSX) [file pntd.0006941.s002.xlsx]

## Sheet: Côte d'Ivoire - 2011
1A_Sm	1B_Sm	1C_Sm	1_POCCA_A	2A_Sm	2B_Sm	2C_Sm	2_POCCA_A	3A_Sm	3B_Sm	3C_Sm	3_POCCA_A	Village
12	6	9	2	2	4	0	3	2	1	5	3	MA
22	2	34	2	31	17	23	3	12	7	12	3	MB
7	3	0	2	1	0	2	2	4	2	4	1	MB
42	21	7	3	7	26	4	3	51	31	69	3	MB
26	35	63	3	109	119	36	3	20	12	36	3	MB
2	0	0	2	13	8	5	2	8	9	13	3	MB
42	22	28	3	33	53	102	3	22	11	41	3	MA
16	21	13	1	12	5	2	2	65	1	0	3	MA
4	7	0	2	56	48	27	3	25	2	27	2	MA
6	2	7	2	3	0	0	2	11	6	16	2	MA
111	78	41	3	126	97	117	3	10	5	5	3	MB
0	0	0	1	0	5	0	1	0	0	1	0	MB
2	1	0	1	10	0	0	0	5	3	1	1	MB
2	11	8	3	41	0	0	3	15	19	17	3	MB
8	2	4	1	1	2	0	2	4	0	0	2	MA
0	0	0	0	0	0	0	0	3	0	0	0	MB
11	5	5	2	29	20	13	2	9	5	2	3	MA
4	2	0	3	27	26	11	3	0	3	8	3	MB
1	1	0	3	18	11	1	3	27	19	25	2	MA
12	0	4	2	22	26	13	3	21	3	7	3	MA
1	1	0	2	2	0	1	2	9	18	14	2	MB
0	0	0	0	0	0	0	0	0	0	0	0	MB
27	18	11	3	0	6	0	3	52	21	38	3	MA
8	8	17	2	34	47	52	3	22	5	10	3	MB
94	88	397	3	494	129	171	3	84	97	102	3	MB
76	65	97	1	103	39	51	3	7	2	0	2	MB
0	0	8	1	7	0	0	1	0	0	0	1	MA
8	6	3	3	18	9	18	1	39	82	108	3	MB
14	21	46	3	187	101	121	3	26	21	15	3	MA
72	62	41	3	53	15	9	2	25	23	22	3	MA
3	17	11	2	0	3	3	3	11	17	27	2	MB
5	8	7	3	148	191	87	3	153	91	178	3	MA
16	92	67	2	197	119	197	3	51	12	56	3	MB
9	5	0	2	28	38	18	3	31	31	34	3	MA
0	0	0	0	0	0	0	0	0	0	0	0	MB
0	0	0	0	2	0	0	0	0	0	0	0	MA
34	21	18	3	23	9	7	3	0	0	3	3	MA
5	3	0	1	5	8	8	2	0	1	1	3	MB
0	0	0	0	0	0	0	0	0	0	0	0	MA
0	0	0	1	0	0	0	0	0	0	0	0	MB
4	0	43	2	11	27	17	1	11	0	0	1	MB
26	45	0	3	118	85	21	3	15	15	24	3	MA
4	1	28	3	18	19	12	3	1	3	1	2	MA
27	4	0	2	29	21	23	3	23	1	22	3	MA
27	24	59	2	0	0	0	3	8	19	20	3	MA
0	0	47	1	0	0	0	1	1	0	0	3	MB
2	0	0	1	12	6	1	1	2	4	12	1	MB
0	0	2	0	0	0	0	0	0	0	0	0	MB
205	22	0	3	12	6	11	3	0	0	4	3	MB
78	0	13	1	1	0	1	2	9	0	15	1	MA
7	11	8	3	73	62	13	3	3	36	46	3	MA
211	42	43	2	295	168	77	3	6	9	52	3	MB
55	4	3	2	12	51	36	2	9	13	14	2	MA
0	0	0	0	0	0	0	0	0	0	0	0	MA
112	36	75	2	38	16	17	3	6	7	10	3	MA
52	0	5	1	4	3	1	1	0	0	0	1	MA
5	0	0	1	0	0	0	1	0	0	0	1	MB
7	0	8	2	18	12	26	2	5	3	1	3	MA
19	16	6	2	54	39	22	2	21	32	36	3	MB
11	58	62	2	3	2	1	2	24	48	92	3	MA
17	7	27	3	1	6	0	3	14	4	2	3	MB
2	0	2	2	33	11	41	3	36	3	16	3	MA
12	5	21	2	2	8	11	3	11	13	17	3	MA
73	22	56	2	51	19	19	3	12	27	39	3	MA
47	0	3	1	3	0	0	1	0	0	0	2	MB
3	0	0	1	0	0	0	1	0	1	0	2	MB
0	0	0	1	0	0	0	0	0	0	0	0	MB
58	66	44	3	48	131	143	2	18	42	41	3	MB
1	4	6	3	14	17	11	2	0	0	2	1	MA
129	85	133	3	28	7	16	2	0	0	0	4	MB
3	9	13	1	4	3	1	1	0	0	0	2	MB
0	0	26	1	0	0	0	0	0	0	0	0	MB
6	5	4	2	6	5	4	3	0	2	4	3	MA
42	13	2	2	25	12	13	2	8	4	0	2	MA
14	1	81	2	39	39	26	3	44	9	16	3	MB
45	41	5	3	4	4	4	3	7	11	5	3	MA
0	0	7	3	2	0	0	2	20	35	33	3	MA
0	0	4	2	1	5	2	1	2	0	0	2	MB
103	121	28	3	54	63	47	3	5	1	0	2	MA
14	13	15	3	11	6	11	3	6	4	2	3	MA
8	26	16	2	4	14	6	2	5	2	1	3	MB
0	0	1	0	0	0	0	0	0	0	0	0	MB
0	7	0	3	102	93	36	3	193	131	136	3	MB
22	25	7	3	78	91	29	3	78	22	85	3	MB
0	6	8	2	8	7	6	3	15	18	17	3	MB
0	0	5	2	3	4	4	3	4	1	4	1	MA
63	22	9	3	23	22	26	3	18	11	31	3	MB
0	2	0	3	95	80	105	3	86	21	115	3	MA
0	0	15	0	1	0	0	0	0	0	0	0	MB
4	0	17	3	27	27	29	3	0	14	5	2	MB
121	58	4	2	40	21	26	3	31	17	20	3	MA
0	3	5	1	3	2	0	2	2	0	10	1	MB
127	62	135	2	34	33	21	3	29	36	22	3	MB
1	0	0	2	0	0	0	2	28	33	21	3	MB
28	8	81	3	22	32	0	2	16	27	10	3	MA
120	61	96	3	12	8	11	3	1	3	1	3	MB
453	156	55	3	164	79	95	3	76	209	71	3	MB
196	20	75	2	25	2	5	4	0	3	8	2	MA
4	10	2	3	70	79	83	3	5	15	14	3	MB
0	0	0	4	0	0	0	0	0	0	0	0	MA
0	0	0	0	0	0	31	1	0	0	0	1	MB
0	0	20	0	0	0	0	0	0	0	0	0	MB
4	7	22	4	84	29	24	3	14	19	24	3	MA
1	1	4	2	84	35	37	3	0	0	1	2	MA
35	18	24	3	107	60	32	3	0	5	0	3	MB
39	53	0	3	39	16	18	3	32	10	19	3	MA
1	0	4	1	0	0	0	1	1	0	1	0	MB
18	8	112	4	71	14	7	3	92	27	22	3	MB
26	29	102	3	89	9	9	3	5	21	24	3	MA
7	19	0	3	24	8	6	2	7	0	10	3	MA
21	12	3	3	21	18	11	3	17	11	25	3	MB
0	0	0	0	0	0	0	0	0	0	0	0	MB
0	0	0	0	0	0	0	0	0	0	0	0	MB
4	2	78	2	16	7	5	2	11	2	2	1	MA
11	21	36	3	32	14	21	3	1	3	6	1	MB
62	0	8	2	31	37	8	3	1	2	0	2	MA
0	0	2	2	0	11	0	2	4	4	1	2	MA
33	19	42	3	69	36	75	2	114	36	52	4	MB
18	8	54	2	3	37	37	2	3	4	0	3	MB
20	7	6	2	14	19	32	2	10	15	10	3	MA
1	0	0	0	7	0	0	0	0	0	0	0	MB
31	54	91	3	170	72	51	3	71	51	67	2	MA
5	17	18	3	8	5	5	1	5	0	6	2	MB
0	0	0	0	4	0	0	0	0	0	0	0	MB
3	0	7	2	17	21	14	3	0	11	0	3	MB
7	4	4	2	39	19	24	3	18	2	4	3	MA
196	99	128	3	41	54	19	3	23	6	7	3	MB
5	2	11	2	8	4	2	3	6	8	0	2	MA
28	40	10	0	25	42	79	3	59	28	11	3	MA
0	0	2	2	18	7	7	2	15	2	0	3	MB
0	1	2	2	8	8	0	1	9	2	0	3	MA
2	0	3	2	3	2	2	2	7	0	8	2	MA
98	106	98	3	35	13	12	3	1	15	14	3	MB
0	0	0	0	0	0	0	0	0	0	0	0	MB
12	11	30	2	8	62	23	2	18	3	1	2	MB
1	11	12	3	58	42	56	3	47	27	28	3	MB
2	17	27	2	3	9	8	2	12	8	12	3	MB
1	6	0	2	43	14	3	3	4	2	0	3	MA
2	0	0	0	0	0	6	0	0	0	0	0	MA
175	17	22	2	15	4	5	2	23	3	12	3	MA
11	0	2	0	0	0	0	0	0	0	0	0	MB
13	12	0	2	39	0	51	2	2	3	4	1	MA
43	33	63	3	19	8	8	3	14	8	9	3	MB
5	1	0	1	0	0	0	1	3	3	7	1	MB
7	11	0	2	18	42	48	1	1	2	6	3	MA
0	0	0	1	51	42	48	1	1	2	5	3	MB
0	0	0	0	0	0	0	1	0	0	0	1	MB
12	14	13	2	3	2	7	2	8	6	3	3	MA
3	3	18	3	57	71	37	3	51	15	37	3	MA
0	0	0	3	0	0	4	3	0	0	0	3	MB
0	0	0	0	0	0	0	0	0	0	0	0	MB
2	3	5	3	6	83	44	3	57	32	81	3	MA
0	0	0	0	0	44	0	2	0	0	0	0	MB
17	17	17	3	30	42	39	2	1	4	6	3	MA
14	2	3	3	3	7	0	3	11	15	8	3	MA
44	27	30	3	61	0	114	3	37	41	2	3	MA
4	8	0	3	5	4	2	2	7	26	11	2	MA
4	0	4	1	9	11	11	2	10	11	22	2	MB
0	0	0	0	0	0	0	0	0	0	0	0	MB
1	2	7	1	0	0	0	2	0	1	1	1	MB
7	9	5	3	0	0	0	3	28	22	0	2	MB
4	0	2	1	2	0	0	1	0	0	0	1	MB
2	0	7	0	0	0	0	0	0	0	0	0	MB
21	0	3	2	24	36	34	2	30	31	55	3	MB
0	1	0	0	0	0	0	0	0	0	0	0	MB
7	14	16	3	22	11	4	3	0	5	0	2	MA
78	49	111	3	103	112	99	3	16	15	40	3	MB
0	0	0	0	3	11	17	0	0	0	0	0	MB
13	41	19	3	35	18	27	2	13	6	12	3	MA
0	0	0	0	0	0	0	0	0	0	0	0	MB
24	4	5	1	2	3	2	1	4	2	2	1	AG
0	0	0	0	0	0	0	0	0	0	0	0	AG
0	0	0	0	0	0	0	0	0	0	0	0	AG
0	0	0	1	0	0	0	0	0	0	0	0	AG
0	0	0	0	0	0	0	0	0	0	0	0	AG
0	0	0	0	0	0	0	0	0	0	0	0	AG
0	0	0	1	0	0	0	4	0	0	0	0	AG
12	5	24	2	0	0	0	2	2	3	3	2	AG
0	0	0	0	0	0	0	0	0	0	0	0	AG
0	0	0	0	0	0	0	0	0	0	0	0	AG
1	0	0	1	1	0	0	0	0	0	0	0	AG
16	3	17	2	9	5	11	2	0	2	0	0	AG
0	0	3	1	0	0	0	2	0	0	0	1	AG
0	0	0	0	0	0	0	0	3	0	0	0	AG
22	0	124	2	9	0	30	2	2	9	3	2	AG
0	3	3	1	5	4	2	1	0	3	3	2	AG
0	0	0	0	0	2	0	4	0	0	0	0	AG
0	0	0	0	0	0	0	0	0	0	0	0	AG
0	0	0	0	0	0	0	0	0	0	0	0	AG
23	8	79	1	6	54	36	0	23	15	34	4	AG
0	2	0	1	3	0	0	1	1	5	5	1	AG
2	0	1	1	1	1	0	1	0	0	1	1	AG
0	0	0	0	0	0	0	0	32	9	38	0	AG
0	0	0	0	0	0	0	0	0	0	0	0	AG
9	3	25	1	3	0	0	1	8	1	0	1	AG
0	0	0	0	0	0	39	0	0	0	0	0	AG
0	0	0	0	0	2	0	0	0	0	0	0	AG
0	0	0	0	0	0	0	0	0	0	0	0	AG
0	0	0	0	0	0	0	0	0	0	0	0	AG
0	0	0	0	0	0	0	1	0	0	0	0	AG
0	0	1	1	0	0	0	1	0	0	0	1	AG
2	1	7	3	4	0	0	2	8	0	2	2	AG
0	0	0	0	0	0	0	0	0	0	0	0	AG
0	0	0	0	0	0	0	0	0	0	0	0	AG
0	0	0	0	0	0	0	0	0	0	0	0	AG
0	0	0	0	0	0	0	0	0	0	0	0	AG
5	10	34	1	0	13	23	1	0	7	18	1	AG
0	0	0	0	0	0	29	0	0	7	0	0	AG
0	0	0	0	0	0	0	0	0	0	0	0	AG
0	0	11	1	11	2	13	1	0	2	2	1	AG
0	0	0	0	0	0	0	0	0	0	0	0	AG
0	0	1	2	0	0	0	1	0	0	3	2	AG
0	0	0	0	0	0	0	4	0	0	0	0	AG
0	0	0	0	0	0	0	0	0	0	0	0	AG
0	0	0	0	0	0	0	0	0	0	0	0	AG
0	0	0	1	0	0	0	4	0	0	0	0	AG
0	2	0	0	0	0	0	0	0	0	0	0	AG
0	0	2	1	0	0	0	0	0	1	0	1	AG
0	0	3	1	1	0	4	2	0	1	1	2	AG
0	0	0	0	0	0	0	0	0	0	0	0	AG
0	0	0	1	0	0	0	1	0	0	3	0	AG
0	0	0	0	0	0	0	0	0	0	0	0	AG
0	0	0	0	0	0	0	0	0	0	0	0	AG
2	0	5	3	1	3	5	1	7	5	10	1	AG
4	0	0	1	6	5	4	1	0	0	0	1	AG
0	0	9	2	1	0	0	1	0	3	0	1	AG
0	0	0	0	0	0	0	1	0	0	0	0	AG
0	0	0	0	0	0	0	0	0	0	0	0	AG
21	15	51	3	27	34	10	3	26	13	41	3	AG
0	0	0	0	0	0	2	0	0	0	0	0	AG
2	2	0	1	0	0	5	2	10	12	13	3	AG
0	0	0	0	0	0	0	4	0	0	0	0	AG
0	0	0	0	0	0	0	0	0	0	0	0	AG
0	0	0	1	0	0	4	1	0	0	0	1	AG
0	0	0	2	0	0	0	1	1	0	0	1	AG
0	0	0	0	0	0	0	0	0	0	3	0	AG
0	0	0	0	0	0	0	0	0	0	0	0	AG
0	0	0	0	0	0	0	0	0	0	0	0	AG
0	0	0	0	0	0	0	0	0	0	0	0	AG
3	0	1	3	15	0	5	2	0	0	0	2	AG
0	0	0	0	0	0	0	0	0	1	0	0	AG
0	0	0	0	0	0	0	0	0	0	0	0	AG
0	0	0	0	0	0	0	0	0	0	0	0	AG
0	0	0	0	0	0	0	0	0	0	0	0	AG
0	0	0	0	0	0	0	0	0	0	0	0	AG
0	0	0	0	0	0	0	0	0	0	0	0	AG
15	5	8	2	2	0	5	2	8	5	13	2	AG
0	0	0	0	0	0	0	0	0	0	0	0	AG
0	0	1	1	5	0	0	2	14	0	6	2	AG
11	0	1	1	3	3	9	1	0	1	10	1	AG
0	0	0	0	0	0	0	0	0	0	0	0	AG
0	0	2	1	0	4	5	1	7	0	9	0	AG
0	0	0	0	0	0	0	0	0	0	0	0	AG
0	4	9	2	4	2	3	1	1	1	2	2	AG
0	0	0	0	0	0	0	1	0	1	0	0	AG
0	0	1	1	0	0	0	0	2	0	3	0	AG
31	12	83	2	1	0	2	3	0	3	0	3	AG
0	0	0	0	0	0	0	2	0	0	0	0	AG
0	0	0	0	0	0	0	1	0	0	0	0	AG
44	9	46	3	35	3	42	3	76	31	88	3	AG
0	0	0	0	0	0	0	0	0	0	0	0	AG
0	0	0	0	0	0	0	1	0	0	0	0	AG
0	0	0	0	0	0	0	0	0	0	0	0	AG
0	0	0	1	0	0	0	0	0	0	0	0	AG
1	0	0	1	2	0	1	1	0	0	0	0	AG
1	2	1	1	4	0	4	1	1	0	4	1	AG
0	0	0	0	0	0	0	0	0	0	0	0	AG
6	13	17	1	8	0	5	2	20	2	2	3	AG
32	27	81	3	53	7	37	2	2	0	6	3	AG
0	0	1	0	0	0	2	2	5	1	3	1	AG
0	0	0	0	0	0	0	0	0	0	0	0	AG
0	0	0	0	0	0	0	0	0	0	0	0	AG
0	0	5	3	4	0	1	2	8	0	0	1	AG
0	0	0	0	0	0	0	0	0	0	0	0	AG
0	0	0	0	0	0	0	4	0	2	0	0	AG
1	0	0	0	0	0	0	0	0	0	0	0	AG
3	0	7	1	1	0	0	1	2	0	2	1	AG
0	0	3	3	13	0	16	3	41	15	34	3	AG
0	0	0	0	0	8	0	0	0	0	0	0	AG
3	0	3	2	17	0	9	1	2	0	2	1	AG
0	8	0	0	0	0	0	1	0	0	0	0	AG
11	0	0	0	1	0	1	1	0	0	0	0	AG
0	0	0	0	0	0	0	0	0	0	0	0	AG
0	0	0	0	0	3	0	0	0	0	0	0	AG
2	0	0	2	4	0	6	2	2	0	2	1	AG
0	3	0	0	0	0	0	0	0	0	0	0	AG
0	0	0	1	2	0	1	1	3	0	5	1	AG
2	0	0	0	0	0	0	0	0	0	0	0	AG
0	0	0	0	0	0	0	0	0	0	0	0	AG
5	0	0	2	0	0	0	1	1	3	5	2	AG
0	0	0	0	0	0	0	0	0	0	0	0	AG
13	9	19	3	24	7	16	3	6	6	12	3	AG
0	0	0	1	0	0	0	1	0	0	0	1	AG
0	0	0	0	0	0	0	0	0	0	0	0	AG
0	0	0	0	0	0	0	1	0	0	0	0	AG
0	0	0	0	0	0	0	0	0	0	0	0	AG
0	0	0	0	1	0	0	0	0	0	0	0	AG
26	0	18	1	8	3	10	2	10	5	2	1	AG
0	0	0	0	0	0	0	0	0	0	0	0	AG
0	0	0	0	0	0	0	0	0	0	0	0	AG
0	0	0	0	0	0	0	1	0	0	0	1	AB
0	0	0	0	0	0	0	0	0	0	0	0	AB
0	0	0	0	1	0	0	1	0	0	0	1	AB
0	0	0	0	0	0	0	0	0	0	1	0	AB
0	0	0	0	0	0	0	0	0	0	0	0	AB
0	0	0	0	0	0	0	0	0	0	0	1	AB
0	0	0	0	0	0	0	0	0	0	0	0	AB
0	0	1	1	0	0	0	0	0	0	0	0	AB
0	0	0	1	6	0	14	1	0	0	0	2	AB
0	0	1	1	0	0	0	0	0	0	0	0	AB
0	0	0	0	0	0	0	0	0	0	0	0	AB
0	0	0	0	0	0	0	0	0	0	0	0	AB
0	0	0	0	0	0	0	0	0	0	0	0	AB
0	0	0	0	0	0	0	0	0	0	0	0	AB
0	0	0	0	0	0	0	0	0	0	0	0	AB
0	0	1	0	0	0	0	0	0	0	0	0	AB
0	0	0	0	0	0	0	0	0	0	0	0	AB
0	0	0	0	0	0	0	0	0	0	0	0	AB
0	0	0	0	0	0	0	0	0	0	0	0	AB
5	7	6	1	0	0	0	1	19	11	11	1	AB
0	0	0	0	0	0	0	0	0	0	0	0	AB
0	0	0	0	0	0	0	0	0	0	0	0	AB
0	0	0	0	0	0	0	0	0	0	0	0	AB
0	0	0	0	0	0	0	0	0	0	0	2	AB
0	0	0	0	0	0	0	0	0	0	0	0	AB
0	0	0	0	0	0	0	0	0	0	0	0	AB
0	0	0	0	0	0	0	0	0	0	0	0	AB
0	0	0	0	0	0	0	0	0	0	0	0	AB
0	0	0	0	0	0	0	0	0	0	0	0	AB
0	0	0	0	0	0	0	0	0	0	0	0	AB
0	0	0	0	0	0	0	0	0	0	0	0	AB
0	0	0	0	0	0	0	0	0	0	0	0	AB
0	0	0	0	0	0	0	0	0	0	0	0	AB
0	0	0	1	0	0	0	1	0	0	2	1	AB
0	0	0	1	0	0	0	1	0	0	2	1	AB
0	0	0	0	0	0	0	0	0	0	0	0	AB
1	0	1	2	0	0	3	2	0	0	0	3	AB
0	0	2	2	0	0	1	1	4	0	16	2	AB
3	8	9	3	0	0	1	2	0	0	0	2	AB
1	0	0	0	2	1	1	0	0	0	0	1	AB
14	1	11	1	1	0	3	1	2	0	0	1	AB
0	0	1	1	0	0	0	1	0	0	0	1	AB
0	0	0	1	0	0	0	4	0	0	0	0	AB
0	0	0	0	0	0	0	0	0	0	0	0	AB
0	0	0	0	0	0	0	0	0	0	0	0	AB
0	0	0	1	0	0	0	0	2	0	0	0	AB
0	0	0	0	0	0	0	0	0	0	0	0	AB
0	0	0	1	0	1	0	1	2	1	0	0	AB
0	1	0	1	0	0	0	1	0	0	0	0	AB
0	0	0	0	0	0	0	0	0	0	0	0	AB
0	0	0	0	0	0	0	0	0	0	0	0	AB
0	0	0	1	1	2	1	1	0	0	3	1	AB
0	0	0	0	0	0	0	0	0	0	0	0	AB
0	0	0	0	0	0	0	0	0	0	0	0	AB
0	0	0	1	0	1	0	1	1	0	0	1	AB
0	0	0	0	0	0	0	0	0	0	0	0	AB
0	0	0	0	0	0	0	0	0	0	0	0	AB
0	0	0	1	0	0	0	1	0	0	0	0	AB
0	0	0	0	0	0	0	0	0	0	0	0	AB
0	0	0	0	0	0	0	1	0	0	0	0	AB
0	0	0	0	0	0	0	0	0	5	0	0	AB
0	0	0	0	0	0	0	0	0	0	0	0	AB
0	1	0	1	1	1	2	0	1	0	1	0	AB
1	1	0	2	4	0	1	2	0	0	0	0	AB
0	0	0	0	0	0	0	0	0	0	0	0	AB
0	0	0	1	0	0	0	1	0	0	0	1	AB
0	0	0	0	0	0	0	0	0	0	0	0	AB
0	0	0	0	0	1	0	0	0	0	0	0	AB
0	0	0	0	0	0	0	0	0	0	0	0	AB
0	0	0	1	0	0	0	0	0	0	0	0	AB
0	0	0	0	0	0	0	0	0	0	0	0	AB
0	0	0	0	0	0	0	0	0	0	0	0	AB
0	0	0	1	0	0	1	0	0	0	0	1	AB
0	0	0	0	0	0	0	0	0	0	0	0	AB
0	0	0	1	0	0	0	1	0	0	0	1	AB
0	0	0	0	0	0	0	0	0	0	0	0	AB
0	0	0	0	0	0	0	0	0	0	0	0	AB
0	0	0	0	0	0	0	0	0	0	0	0	AB
33	24	65	3	83	89	83	3	6	13	197	3	AB
0	0	0	0	0	0	0	0	0	0	0	0	AB
0	0	0	1	0	0	0	1	0	0	0	1	AB
0	0	0	0	0	0	0	0	0	0	0	0	AB
0	0	0	0	1	0	0	0	0	0	0	0	AB
0	0	0	0	0	0	0	0	0	0	0	0	AB
0	0	0	0	0	0	0	0	1	0	0	0	AB
0	0	1	0	6	1	2	1	8	0	1	1	AB
0	0	0	0	0	0	1	0	0	0	0	0	AB
0	0	0	1	0	1	0	1	0	0	0	0	AB
0	0	0	0	0	0	0	0	0	0	0	1	AB
0	0	0	0	0	0	0	0	0	0	0	0	AB
0	0	0	0	0	0	0	0	0	0	0	0	AB
0	0	0	0	0	0	0	0	0	0	0	1	AB
0	0	0	0	0	0	0	1	0	0	0	1	AB
0	0	0	0	0	0	0	0	0	0	0	1	AB
0	0	0	0	0	0	0	1	0	0	0	0	AB
0	0	0	0	0	0	0	0	0	0	0	0	AB
0	0	0	0	0	0	0	0	1	0	0	0	AB
0	0	0	0	0	0	0	1	0	0	0	0	AB
0	0	0	0	0	0	0	0	0	0	0	1	AB
0	0	0	0	1	0	0	0	0	0	0	0	AB
0	0	0	0	0	0	0	0	0	0	0	0	AB
0	0	0	0	0	0	0	0	0	0	0	0	AB
0	0	0	0	0	0	0	0	0	2	2	0	AB
0	0	3	1	0	0	0	1	0	0	0	1	AB
1	0	0	0	0	0	0	0	0	0	0	1	AB
0	0	0	0	0	0	0	0	0	0	0	0	AB
0	0	2	0	0	0	0	0	0	0	0	0	AB
0	0	0	0	0	0	0	0	0	0	0	0	AB
0	0	0	0	0	0	0	0	0	0	0	0	AB
0	0	0	0	0	0	0	0	0	0	0	0	AB
0	0	0	0	0	0	0	0	0	0	0	0	AB
0	0	0	0	0	0	0	0	0	0	0	0	AB
0	0	2	1	3	0	3	0	0	0	0	1	AB
0	0	0	0	0	0	0	0	0	0	0	0	AB
0	0	0	0	0	0	0	0	0	0	0	0	AB
0	0	0	0	0	0	0	0	0	0	0	0	AB
1	0	0	0	0	0	0	0	0	0	0	0	AB
0	0	0	0	0	0	0	1	0	0	0	0	AB
0	0	0	0	0	0	0	0	0	0	0	0	AB
0	0	0	0	0	0	0	0	0	0	0	0	AB
0	0	0	1	0	0	0	1	1	0	0	0	AB
0	0	0	0	0	0	0	0	0	0	0	0	AB
0	0	0	0	0	0	0	0	0	0	0	0	AB
0	0	0	0	0	0	0	0	0	0	0	0	AB
1	0	0	0	0	0	0	0	1	0	1	1	AB
0	0	0	0	0	0	0	0	0	0	0	0	AB
0	0	0	0	0	0	0	0	0	0	0	0	AB
0	0	0	0	0	0	4	0	0	0	0	0	AB
3	0	10	2	0	0	0	1	2	2	7	2	AB
0	0	0	0	0	0	0	0	0	0	0	0	AB
0	0	0	0	0	0	0	0	0	0	0	0	AB
2	0	2	0	0	0	0	0	0	0	0	0	AB
0	0	0	0	0	0	0	0	0	0	0	0	AB
0	0	0	0	0	0	0	0	0	0	0	0	AB
0	0	0	0	0	0	0	0	0	0	0	0	AB
0	0	0	0	0	0	0	0	0	0	0	0	AB
0	0	0	0	0	0	0	0	0	0	0	0	AB
0	0	0	2	4	0	0	2	4	0	2	1	AB
0	0	0	2	0	0	1	2	0	0	0	3	AB
0	0	0	0	0	0	0	0	1	0	0	0	AB
0	0	0	0	0	0	0	0	0	0	0	0	AB
0	0	0	0	0	0	0	0	0	0	0	0	AB
0	0	0	0	0	0	0	0	0	0	0	0	AB
0	0	0	0	0	0	0	0	0	0	0	0	AB
0	0	0	0	0	1	0	0	0	0	0	0	AB
0	0	0	0	0	0	0	0	0	0	0	0	AB

## Sheet: Côte d'Ivoire - Man
Sm1Apos	Sm1Bpos	Sm1Cpos	Sm2Apos	Sm2Bpos	Sm2Cpos	POC_CCA
0	0	0	0	0	0	2
0	0	0	0	0	0	0
0	0	0	0	0	0	0
0	0	0	0	0	0	0
0	0	0	0	0	0	1
0	0	0	0	0	0	1
0	0	0	0	0	0	0
0	0	0	0	0	0	2
0	0	0	0	0	0	2
0	0	0	0	0	0	0
0	0	0	0	0	0	0
0	0	0				1
0	0	0	0	0	0	0
0	0	0				0
0	0	0	0	0	0	0
0	0	0	0	0	0	0
0	0	0	0	0	0	0
0	0	0	0	0	0	0
0	0	0	0	0	0	0
0	0	0	0	0	0	0
0	0	0	0	0	0	0
0	0	1	0	1	0	2
0	0	0	0	0	0	0
0	0	0	0	0	0	0
0	0	0	0	0	0	0
0	0	0	0	0	0	0
0	0	0	0	0	0	0
0	0	0	0	0	0	0
0	0	0	0	0	0	0
0	0	0	0	0	0	0
0	0	0	0	0	0	0
0	0	0	0	0	0	0
0	0	0	0	0	0	1
0	0	0	0	0	0	2
0	0	0	0	0	0	0
0	0	0				0
0	0	0	0	0	0	0
0	0	0	0	0	0	0
0	0	0	0	0	0	0
0	0	0	0	0	0	1
0	0	0	0	0	0	0
0	0	0	0	0	0	0
0	0	0	3	0	1	1
0	0	0	0	0	0	0
0	0	0	0	0	0	0
0	0	0	0	0	0	1
0	0	0	0	0	0	1
0	0	0				1
0	0	0	0	0	0	0
0	0	0	0	0	0	1
0	0	0	0	0	0	0
0	0	0	0	0	0	1
0	0	1	0	0	0	0
0	0	0	0	0	0	0
0	0	0	0	0	0	1
2	2	0	6	3	2	2
0	0	0	0	0	0	1
0	0	0	0	0	0	1
0	1	0	0	0	0	0
0	0	0	0	0	0	0
0	0	0	0	0	0	1
0	0	0	0	0	0	1
0	0	0	0	0	0	0
0	0	0	1	1	0	1
0	0	0	0	0	0	0
42	15	105	66	27	76	2
0	0	0	0	0	0	0
0	0	0	0	0	0	1
0	0	0	0	0	0	1
0	0	0	0	0	0	1
0	0	0	0	0	0	0
0	0	0	0	0	0	0
0	0	0	0	0	0	1
0	0	0	0	0	0	0
0	0	0	0	0	0	0
0	0	0	0	0	0	0
0	0	0	0	0	0	1
0	0	0	0	0	0	1
0	0	0	0	0	0	1
0	0	0	0	0	0	1
0	0	0	0	0	0	2
0	0	0	0	0	0	0
0	0	0	0	0	0	0
0	0	0	0	0	0	0
0	0	0	0	2	0	0
0	0	0	0	0	0	0
0	0	0	0	0	0	1
0	0	0	0	0	0	1
0	0	0	0	0	0	1
0	0	0	0	0	0	0
0	0	0	0	0	0	1
0	0	0	0	0	0	0
0	0	0	0	0	0	0
0	0	0	0	0	0	0
0	0	0	0	0	0	0
0	0	0	0	0	0	0
0	0	0	0	0	0	0
0	0	0	0	0	0	0
0	0	0	0	0	0	0
0	0	0	0	0	0	0
0	0	0	0	0	0	2
0	0	0	0	0	0	0
0	0	0	0	0	0	0
0	0	0	0	0	0	0
0	0	0	0	0	0	2
0	0	0	0	0	0	2
0	0	0	0	0	0	0
0	0	0	0	0	0	0
0	0	0	0	0	0	0
0	0	0	0	0	0	0
0	0	0	0	0	0	0
0	0	0	0	0	0	2
0	0	0	0	0	0	2
0	0	0	0	0	0	0
0	0	0	0	0	0	0
0	0	0	0	0	0	0
0	0	0	0	0	0	0
0	0	0	0	0	0	0
0	0	0	0	0	0	0
0	0	0	0	0	0	2
0	0	0	0	0	0	2
0	0	0				2
0	0	0	0	0	0	0
0	0	0	0	0	0	0
0	0	0	0	0	0	0
0	0	0	0	0	0	0
0	0	0	0	0	0	2
0	0	0	0	0	0	0
0	0	0	0	0	0	0
0	0	0	0	0	0	0
0	0	0	0	0	0	0
0	0	0	0	0	0	0
0	0	0	0	0	0	2
0	0	0	0	0	0	2
0	0	0	0	0	0	2
0	0	0	0	0	0	0
0	0	0	0	0	0	0
0	0	0	0	0	0	0
0	0	0	0	0	0	0
0	0	0	0	0	0	0
0	0	0	0	0		0
0	0	0	0	0	0	0
0	0	0	0	0	0	0
0	0	0	0	0	0	0
0	0	0	0	0	0	0
0	0	0	0	0	0	0
0	0	0	0	0	0	0
0	0	0	0	0	0	0
0	0	0	0	0	0	0
0	0	0	0	0	0	0
0	0	0	0	0	0	0
0	0	0	0	0	0	0
0	0	0	0	0	0	0
0	0	0	0	0	0	0
0	0	0	0	0	0	0
0	0	0	0	0	0	1
0	0	0	0	0	0	1
0	0	0	0	0	0	0
0	0	0	0	0	0	0
0	0	0	0	0	0	0
1	0	0	1	1	1	2
0	0	0	0	0	0	0
0	0	0	0	0	0	0
0	0	0	0	0	0	1
0	0	0	0	0	0	0
0	0	0	0	0	0	0
0	0	0	0	0	0	1
0	0	0	0	0	0	2
1	0	0	1	1	1	2
0	0	0	0	0	0	1
0	0	0	0	0	0	0
0	0	0	0	0	0	0
0	0	0	0	0	0	0
0	0	0	0	0	0	0
0	0	0	0	0	0	1
0	0	0	0	0	0	0
0	0	0	0	0	0	1
0	0	0	0	0	0	0
0	0	0	0	0	0	1
0	1	3	1	1	2	2
0	0	0	0	0	0	0
0	0	0	0	0	0	0
0	0	0	0	0	0	0
0	0	0	0	0	0	0
0	0	0	0	0	0	0
0	0	0	0	0	0	0
0	0	0	0	0	0	1
0	0	0	0	0	0	0
0	0	0	0	0	0	0
0	0	0	0	0	0	1
0	0	0	0	0	0	0
0	0	0	0	0	0	0
0	0	0	0	0	0	0
0	0	0	0	0	0	0
0	0	0	0	0	0	0
0	0	0	0	0	0	1
0	0	0	0	0	0	0
0	0	0	0	0	0	0
0	0	0	0	0	0	1
0	0	0	0	0	0	0
0	0	0	0	0	0	0
0	0	0	0	0	0	1
0	0	0	0	0	0	0
0	0	0	0	0	0	0
0	0	0	0	0	0	0
0	0	0	0	0	0	2
0	0	0	0	0	0	0
0	0	0	0	0	0	0
0	0	0	0	0	0	0
0	0	0	0	0	0	1
0	0	0	0	0	0	1
0	0	0	0	0	0	0
0	0	0	0	0	0	0
0	0	0	0	0	0	0
0	0	0	0	0	0	0
0	0	0	0	0	0	1
0	0	0	0	0	0	0
0	0	0	0	0	0	0
0	0	0	0	0	0	0
0	0	0	0	0	0	0
0	0	0	0	0	0	0
0	0	0	0	0	0	0
0	0	0	0	0	0	2
0	0	0	0	2	1	2
0	0	0	0	0	0	1
0	0	0	0	0	0	2
0	0	0	0	0	0	0
0	0	0	0	0	0	0
0	0	0	0	0	0	0
0	0	0	0	0	0	0
0	0	0	0	0	0	0
0	0	0	0	0	0	0
0	0	0	0	0	0	0
0	0	0	0	0	0	0
0	1	0	0	1	1	2
0	0	0	0	0	0	2
0	0	0	0	0	0	0
0	0	0	0	0	0	0
0	0	0	0	0	0	0
0	0	1	0	0	1	0
0	0	0	0	0	0	0
0	0	0	0	0	0	0
0	0	0	0	0	0	1
0	0	0	0	0	0	1
0	0	0	0	0	0	0
0	1	1	1	1	1	2
0	0	0	0	0	0	0
0	0	0	0	0	0	0
0	0	0	0	0	0	0
0	0	0	0	0	0	0
0	0	0	0	0	0	0
0	0	0				0
0	0	0				0
0	0	0	0	0	0	1
0	0	0	0	0	0	1
0	0	0	0	0	0	1
0	0	0	0	0	0	2
0	0	0	0	0	0	1
0	0	0	0	0	0	0
0	0	0	0	0	0	0
0	0	0	0	0	0	0
0	0	0	0	0	0	0
0	0	0	0	0	0	2
0	0	0	0	0	0	0
0	0	0				0
0	0	0	0	0	0	0
0	0	0	0	0	0	2
0	0	0	0	0	0	0
0	0	0				0
0	0	0	0	0	0	2
0	0	0	0	0	0	0
0	0	0	0	0	0	0
0	0	0	0	0	0	0
0	0	0				1
0	0	0				0
0	0	0	0	0	0	0
0	0	0				0
0	0	0	0	0	0	0
0	0	0	0	0	0	0
0	0	0	0	0	0	1
0	0	0	0	0	0	0
0	0	0	0	0	0	0
4	10	6	2	0	0	2
0	0	0	0	0	0	2
0	0	0	0	0	0	1
0	0	0				0
0	0	0				0
0	0	0	0	0	0	2
0	0	0	0	0	0	0
0	0	0	0	0	0	0
0	0	0	0	0	0	0
0	0	0	0	0	0	0
0	0	0				0
0	0	0	0	0	0	1
0	0	0	0	0	0	0
0	0	0				0
0	0	0	0	0	0	1
						0
						0
						0
0	0	0	0	0	0	0
0	0	0	0	0	0	0
0	0	0	0	0	0	0
0	0	0	0	0	0	0
0	0	0	0	0	0	1
0	0	0	0	0	0	0
0	0	0	0	0	0	1
0	0	0	0	0	0	0
0	0	0	0	0	0	0
0	0	0	0	0	0	0
0	0	0	0	0	0	0
0	0	0	0	0	0	0
0	0	0	0	0	0	0
0	0	0	0	0	0	1
1	0	0	1	1	0	2
0	0	0	0	0	0	0
0	0	0	0	0	0	1
0	0	0	0	0	0	0
0	0	0	0	0	0	0
0	0	0	0	0	0	0
0	0	0	0	0	0	1
0	0	0	0	0	0	0
0	0	0	0	0	0	0
0	0	0	0	0	0	0
0	0	0	0	0	0	0
0	0	0	0	0	0	0
0	0	0	3	10	12	2
0	0	0	0	0	0	0
0	0	0	0	0	0	0
0	0	0	0	0	0	2
0	0	0	0	0	0	0
0	0	0	0	0	0	1
0	0	0	0	0	0	0
0	0	0	0	0	0	0
0	0	0	0	0	0	1
0	0	0	0	0	0	2
0	0	0				0
0	0	0	0	0	0	1
0	0	0				1
0	0	0	0	0	0	1
0	0	0				0
0	0	0	0	0	0	0
0	0	0	0	0	0	0
0	0	0	0	0	0	1
0	0	0	0	0	0	2
0	0	0	0	0	0	0
0	0	0	0	0	0	0
0	0	0	0	0	0	1
0	0	0	0	0	0	0
0	0	0	0	0	0	2
0	0	0	0	0	0	0
0	0	0	0	0	0	0
0	0	0	0	0	0	0
0	0	0	0	0	0	0
0	0	0	0	0	0	0
0	0	0	0	0	0	0
0	0	0	0	0	0	1
0	0	0	0	0	0	0
0	0	0	0	0	0	1
0	0	0	0	0	0	0
0	0	0	0	0	0	0
0	0	0	0	0	0	1
2	6	4	0	5	4	0
0	0	0	0	0	0	0
0	0	0	0	0	0	0
0	0	0	0	0	0	0
0	0	0	0	0	0	0
0	0	0	0	0	0	0
0	0	0	0	0	0	0
0	0	0	0	0	0	0
0	0	0	0	0	0	2
0	0	0	0	0	0	0
0	0	0	0	0	0	0
0	0	0	0	0	0	0
0	0	0	0	0	0	0
1	1	0	0	0	0	2
0	0	0	0	0	0	0
0	0	0	0	0	0	0
0	0	0	0	0	0	0
0	0	0	0	0	0	2
0	0	0	0	0	0	0
0	0	0	0	0	0	0
0	0	0	0	0	0	0
						1
0	0	0	0	0	0	1
0	0	0	0	0	0	0
0	0	0	0	0	0	0
0	0	0	0	0	0	0
0	0	0	0	0	0	0
						0
0	0	0	0	0	0	1
0	0	0	0	0	0	0
0	0	0	0	0	0	0
3	4	5	3	3	4	2
0	0	0	0	0	0	0
0	0	0	0	0	0	1
0	0	0	0	0	0	0
0	0	0	0	0	0	0
0	0	0	0	0	0	0
0	0	0	0	0	0	0
0	0	0	0	0	0	0
0	0	0	0	0	0	0
0	0	0	0	0	0	0
0	0	0	0	0	0	0
0	0	0	0	0	0	1
0	1	0	0	0	0	1
0	0	0	0	0	0	1
0	0	0	0	0	0	0
0	0	0	0	0	0	0
0	0	0	0	0	0	0
0	0	0	0	0	0	0
0	0	0	0	0	0	0
0	0	0	0	0	0	0
0	0	0	0	0	0	0
0	0	0	0	0	0	1
0	0	0	0	0	0	0
0	0	0	0	0	0	1
0	0	0	0	0	0	0
0	0	0	0	0	0	0
0	0	0	0	0	0	0
0	0	0	0	0	0	1
0	0	0	0	0	0	0
0	0	0	0	0	0	1
0	0	0	0	0	0	1
0	0	0	0	0	0	0
0	0	0	0	0	0	0
0	0	0	0	0	0	0
0	0	0	0	0	0	0
0	0	0	0	0	0	1
0	0	0	0	0	0	0
0	0	0	0	0	0	0
0	0	0	0	0	0	0
0	0	0	0	0	0	0
0	0	0	0	0	0	0
0	0	0	0	0	0	1
0	0	0	0	0	0	2
0	0	0	0	0	0	0
0	0	0	0	0	0	0
0	0	0	0	0	0	0
0	0	0	0	0	0	0
0	0	0	0	0	0	0
0	0	0	0	0	0	0
0	0	0	0	0	0	1
0	0	0	0	0	0	0
0	0	0	0	0	0	0
0	0	0	0	0	0	0
0	0	0	0	0	0	0
0	0	0	0	0	0	0
0	0	0	0	0	0	0
0	0	0	0	0	0	0
0	0	0	0	0	0	1
0	0	0				0
0	0	0	0	0	0	0
0	0	0	0	0	0	0
0	0	0	0	0	0	0
0	0	0	0	0	0	0
0	1	2	0	0	0	0
0	0	0				0
0	0	0				1
0	0	0	0	0	0	1
0	0	0				0
0	0	0				0
0	0	0				0
0	0	0	0	0	0	1
0	0	0				0
0	0	0				0
0	0	0	0	0	0	2
0	0	0				0
2	2	1	0	0	0	1
0	0	0	0	0	0	0
0	0	0	0	0	0	0
0	0	0	0	0	0	2
0	0	0				0
0	0	0	0	0	0	0
0	0	0	0	0	0	1
0	0	0				0
0	0	0				0
0	0	0	0	0	0	0
0	0	0				0
0	0	0				0
0	0	0				1
0	0	0	0	0	0	0
0	0	0				0
0	0	0	0	0	0	0
0	0	0	0	0	0	0
0	0	0				0
0	0	0	0	0	0	0
0	0	0	0	0	0	0
0	0	0				0
0	0	0	0	1	0	2
0	0	0	0	0	0	0
0	0	0				0
0	0	0	0	0	0	0
0	0	0				0
0	0	0	0	0	0	0
0	0	0	0	1	0	2
0	0	0	0	0	0	0
0	0	0	0	0	0	0
0	0	0	0	0	0	0
0	0	0	0	0	0	0
0	0	0	0	0	0	0
0	0	0	0	0	0	0
0	0	0	0	0	0	1
0	0	0	0	0	0	0
0	0	0	0	0	0	0
0	0	0	0	0	0	0
0	0	0	0	0	0	1
0	0	0	0	0	0	0
0	0	0	0	0	0	0
0	0	0	0	0	0	0
0	0	0	0	0	0	1
0	0	0	0	0	0	0
0	0	0	0	0	0	0
0	0	0	0	0	0	1
0	0	0	0	0	0	0
0	0	0	0	0	0	0
0	0	0	0	0	0	0
0	0	0	0	0	0	0
0	0	0	0	0	0	1
0	0	0	0	0	0	1
0	2	1	0	1	9	1
0	1	2	0	1	1	2
0	0	0	0	0	0	1
0	0	0	0	0	0	2
0	0	0	0	0	0	0
0	0	0	0	0	0	0
0	0	0	0	0	0	0
0	0	0	0	0	0	0
0	0	0	0	0	0	0
0	0	0	0	0	0	0
0	0	0	0	0	0	0
0	0	0	0	0	0	0
0	0	0	0	0	0	0
0	0	0	0	0	0	0
0	0	0	0	0	0	0
0	0	0	0	0	0	0
0	0	0	0	0	0	0
0	0	0	0	0	0	0
0	0	0	0	0	0	0
0	0	0	0	0	0	1
0	0	0	0	0	0	0
0	0	0	0	0	0	0
0	0	0	0	0	0	0
0	0	0	0	0	0	0
0	0	0	0	0	0	0
0	0	0	0	0	0	2
0	0	0	0	0	0	0
0	0	0	0	0	0	0
0	0	0	0	0	0	1
0	0	0	0	0	0	0
0	0	0	0	0	0	0
0	0	0	0	0	0	0
0	0	0	0	0	0	0
0	0	0	0	0	0	0
13	12	24	12	10	28	2
0	0	0	0	0	0	0
0	0	0	0	0	0	2
0	0	0	0	0	0	0
0	0	0	0	0	0	0
0	0	0	0	0	0	0
0	0	0	0	0	0	0
0	0	0	0	0	1	2
1	0	1	1	0	0	2
0	0	0	0	0	0	0
0	0	0	0	0	0	0
0	2	2	0	1	0	2
0	0	0	0	0	0	0
0	0	0	0	0	0	0
0	0	0	0	0	0	1
4	3	1	3	3	0	2
0	0	0	0	0	0	2
2	1	1	2	1	0	2
0	0	0	0	0	0	2
0	0	0	0	0	0	0
4	2	6	13	5	5	2
0	0	0	0	0	0	0
0	0	0	0	0	0	1
0	0	0	0	0	0	1
0	0	0	0	0	0	2
1	2	4	1	1	1	2
0	0	0	0	0	0	0
0	0	0	0	0	0	0
0	0	0	0	0	0	0
0	0	0	0	0	0	2
0	0	0	0	0	0	0
0	0	0	0	0	0	0
0	0	0	0	0	0	1
0	0	0	0	0	0	2
0	0	0	0	0	0	0
0	0	0	0	0	0	0
0	0	0	0	0	0	0
0	0	0	0	0	0	2
0	0	0	0	0	0	2
0	0	0	0	0	0	2
2	4	0	2	5	8	2
0	0	0	0	0	0	0
0	0	0	0	0	0	2
1	1	0	0	0	0	2
0	0	0	0	0	0	0
2	2	1	3	3	2	2
0	0	0	0	0	0	0
0	0	0	0	0	0	2
0	0	0	0	0	0	0
0	0	0	0	0	0	1
0	1	2	0	1	0	1
0	0	0	0	0	0	0
0	0	0	0	0	0	0
0	0	0	0	0	0	0
0	0	0	0	0	0	1
0	0	0	0	0	0	1
0	0	0	0	0	0	2
0	0	0	0	0	0	2
10	5	8	8	8	9	2
0	0	0	0	0	0	1
0	0	0	0	0	0	1
0	0	0	0	0	0	0
0	0	0	0	0	0	0
0	0	0	0	0	0	1
0	0	0	0	0	0	0
0	0	0	0	0	0	0
0	0	0	0	0	0	0
0	0	0	0	0	0	0
0	0	0	0	0	0	1
0	0	0	0	0	0	0
0	0	0	0	0	0	0
0	0	0	0	0	0	1
0	0	0	0	0	0	1
0	0	0	0	0	0	0
0	0	0	0	0	0	1
0	0	0	0	0	0	0
0	0	0	0	0	0	1
0	0	0	0	0	0	1
0	0	0	0	0	0	0
0	0	0	0	0	0	1
0	0	0	0	0	0	0
0	0	0	0	0	0	1
0	0	0	0	0	0	0
1	1	0	0	0	0	1
0	0	0	0	0	0	0
0	0	0	0	0	0	0
0	0	0	0	0	0	0
0	0	0	0	0	0	0
0	0	0	0	0	0	0
0	0	0	0	0	0	1
0	0	0	0	0	0	0
0	0	0	0	0	0	0
0	0	0	0	0	0	0
0	0	0	0	0	0	0
0	0	0	0	0	0	0
0	0	0	0	0	0	2
0	0	0	0	0	0	0
0	0	0	0	0	0	1
0	0	0	0	0	0	0
0	0	0	0	0	0	1
0	0	0	0	0	0	1
0	0	0	0	0	0	0
3	10	4	4	9	4	1
0	0	0	1	1	0	0
0	0	0	0	0	0	0
0	0	0	0	0	0	1
0	0	0	0	0	0	1
0	0	0	0	0	0	0
0	0	0	0	0	0	0
0	0	0	0	0	0	2
0	0	0	0	0	0	1
0	0	0	0	0	0	0
0	0	0	0	0	0	0
0	0	0	0	0	0	1
0	0	0	0	0	0	0
0	0	0	0	0	0	1
0	0	0	0	0	0	1
0	0	0	0	0	0	0
0	0	0	0	0	0	1
0	0	0	0	0	0	0
0	0	0	0	0	0	0
0	0	0	0	0	0	0
0	0	0	0	0	0	0
0	0	0	0	0	0	1
0	0	0	0	0	0	2
0	0	0	0	0	0	0
0	1	0	0	0	0	1
0	0	0	0	0	0	0
0	0	0	0	0	0	1
0	0	0	0	0	0	0
0	0	0	0	0	0	0
0	0	0	0	0	0	2
0	0	0	0	0	0	0
0	0	0	0	0	0	0
0	0	0	0	0	0	1
0	0	0	0	0	0	0
0	0	0	0	0	0	0
0	0	0	0	0	0	0
0	0	0	0	0	0	1
0	0	0	0	0	0	0
0	0	0	0	0	0	0
0	0	0	0	0	0	1
0	0	0	0	0	0	0
0	0	0	0	0	0	2
0	0	0	0	0	0	0
0	0	0	0	0	0	1

## Sheet: Côte d'Ivoire - 2010
Village	Sm1A	Sm1B	_1_CCA	Sm2A	Sm2B	_2_CCA
Makouguié	0	0	3	0	0	1
Makouguié	1	3	3	0	0	1
Makouguié	0	3	3	3	4	2
Makouguié	0	0	2	0	0	1
Makouguié	5	4	3	0	1	2
Makouguié	0	0	1	0	0	4
Makouguié	0	0	4	0	0	4
Makouguié	0	0	0	0	0	0
Makouguié	0	0	3	1	1	2
Makouguié	0	0	4	0	0	4
Makouguié	1	1	1	0	0	4
Makouguié	0	0	4	0	0	0
Makouguié	0	0	0	0	0	0
Makouguié	0	2	2	0	0	3
Makouguié	0	0	4	0	0	0
Makouguié	0	0	4	0	1	4
Makouguié	0	0	1	0	0	1
Makouguié	0	0	4	0	0	0
Makouguié	0	0	4	0	0	4
Makouguié	0	0	4	0	0	0
Makouguié	0	0	1	1	0	4
Makouguié	0	0	4	0	0	4
Makouguié	1	3	4	1	0	4
Makouguié	25	26	3	6	5	3
Makouguié	8	9	3	4	10	3
Makouguié	0	0	4	0	0	4
Makouguié	0	0	0	0	0	0
Makouguié	0	0	0	0	0	4
Makouguié	0	0	1	0	0	1
Makouguié	10	8	3	0	1	3
Makouguié	1	2	1	0	0	2
Makouguié	0	0	4	0	0	0
Makouguié	0	0	4	0	0	0
Makouguié	0	0	4	0	0	4
Makouguié	22	27	3	0	7	3
Makouguié	0	0	1	0	0	0
Makouguié	0	0	1	2	0	4
Makouguié	0	0	1	0	0	0
Makouguié	0	0	0	0	0	0
Makouguié	0	0	2	2	2	3
Makouguié	0	0	1	0	0	4
Makouguié	0	0	0	0	0	4
Makouguié	0	0	4	0	0	1
Makouguié	0	0	0	0	0	0
Makouguié	0	0	0	0	0	4
Makouguié	2	2	1	2	1	3
Makouguié	0	0	0	0	0	0
Makouguié	0	0	4	0	0	4
Makouguié	0	0	0	0	0	0
Makouguié	0	0	4	0	0	0
Makouguié	0	0	4	0	0	4
Makouguié	5	4	3	7	3	3
Makouguié	1	2	3	2	0	3
Makouguié	0	0	0	0	0	0
Makouguié	0	0	0	0	0	0
Makouguié	0	0	4	0	0	0
Makouguié	0	0	4	0	0	4
Makouguié	0	0	0	0	0	0
Makouguié	0	0	0	0	0	4
Makouguié	0	0	0	0	0	4
Makouguié	0	0	0	0	0	4
Makouguié	0	0	0	0	0	0
Makouguié	0	0	0	0	0	4
Makouguié	0	0	1	0	0	1
Makouguié	0	0	0	0	0	0
Makouguié	0	0	1	0	0	4
Makouguié	0	0	0	0	0	0
Makouguié	1	1	2	0	0	2
Makouguié	0	0	0	0	0	4
Makouguié	0	0	1	0	0	4
Makouguié	0	0	4	0	0	1
Makouguié	0	0	2	1	0	4
Makouguié	0	0	0	0	0	0
Makouguié	1	2	2	0	1	2
Makouguié	3	1	1	0	0	3
Makouguié	0	0	3	0	0	2
Makouguié	0	0	4	0	0	4
Makouguié	0	0	4	0	0	4
Makouguié	0	0	4	0	0	2
Makouguié	0	0	0	0	0	4
Makouguié	1	0	1	0	0	1
Makouguié	0	0	4	0	0	0
Makouguié	9	5	2	1	2	2
Makouguié	2	0	2	3	5	4
Makouguié	0	0	4	0	0	4
Makouguié	11	1	3	22	41	3
Makouguié	0	0	1	0	0	1
Makouguié	0	0	0	0	0	4
Makouguié	0	0	4	0	0	0
Makouguié	0	0	0	0	0	0
Makouguié	0	0	1	0	0	0
Makouguié	0	0	0	0	0	2
Makouguié	0	0	1	0	0	3
Makouguié	0	0	4	0	0	0
Makouguié	0	0	3	0	0	3
Makouguié	0	0	4	0	0	0
Makouguié	0	0	0	0	0	4
Makouguié	0	0	0	0	0	4
Makouguié	21	24	3	8	9	3
Makouguié	0	0	0	0	0	0
Makouguié	0	0	1	0	0	0
Makouguié	0	0	4	0	0	4
Makouguié	0	0	0	0	0	4
Makouguié	0	0	0	0	0	0
Makouguié	0	0	0	0	0	0
Makouguié	0	0	0	0	0	0
Makouguié	0	0	2	0	0	0
Makouguié	0	0	0	0	0	0
Makouguié	0	0	4	0	0	0
M'Bromé	0	0	3	0	2	3
M'Bromé	5	2	3	51	16	3
M'Bromé	0	0	0	0	0	0
M'Bromé	0	0	1	0	0	4
M'Bromé	0	0	1	0	0	4
M'Bromé	10	15	3	14	8	3
M'Bromé	0	0	4	0	0	4
M'Bromé	0	0	1	0	0	4
M'Bromé	0	0	4	0	0	4
M'Bromé	0	0	1	0	0	2
M'Bromé	0	0	1	0	0	0
M'Bromé	0	0	4	0	0	1
M'Bromé	12	13	3	36	37	3
M'Bromé	2	2	3	11	7	3
M'Bromé	0	0	1	0	0	4
M'Bromé	0	0	4	0	0	4
M'Bromé	0	0	4	0	0	0
M'Bromé	0	0	4	0	0	0
M'Bromé	0	0	0	0	0	1
M'Bromé	0	0	0	0	0	4
M'Bromé	0	0	0	0	0	4
M'Bromé	0	0	4	0	0	4
M'Bromé	0	0	0	0	0	0
M'Bromé	0	0	1	0	0	0
M'Bromé	0	0	3	0	0	0
M'Bromé	0	0	0	0	0	0
M'Bromé	0	0	1	0	0	0
M'Bromé	2	0	1	0	0	0
M'Bromé	0	0	1	0	2	2
M'Bromé	0	0	1	0	0	0
M'Bromé	0	0	0	0	0	4
M'Bromé	0	0	2	0	0	0
M'Bromé	1	0	4	1	0	2
M'Bromé	0	0	0			0
M'Bromé	0	0	0	0	0	0
M'Bromé	0	0	0	0	0	0
M'Bromé	0	0	0	0	0	0
M'Bromé	0	0	3	0	0	2
M'Bromé	0	0	4	0	0	4
M'Bromé	0	0	3	0	0	4
M'Bromé	0	0	0	0	0	0
M'Bromé	0	0	4	0	0	0
M'Bromé	0	0	0	0	0	1
M'Bromé	0	1	4	0	0	0
M'Bromé	0	2	4	0	0	4
M'Bromé	0	0	0	0	0	0
M'Bromé	0	0	4	0	0	4
M'Bromé	7	9	2	2	2	3
M'Bromé	0	0	3	0	0	3
M'Bromé	0	1	4	0	0	0
M'Bromé	0	0	4	0	0	0
M'Bromé	0	0	1	0	0	4
M'Bromé	0	0	0	0	0	0
M'Bromé	0	0	0	0	0	2
M'Bromé	4	3	3	11	5	2
M'Bromé	25	23	3			3
M'Bromé	0	0	4	0	0	0
M'Bromé	0	0	4	0	0	0
M'Bromé	0	1	0	0	0	0
M'Bromé	0	0	4	0	0	4
M'Bromé	0	0	4	0	0	1
M'Bromé	0	0	0	0	0	0
M'Bromé	0	0	4	0	0	1
M'Bromé	0	0	0	0	0	4
M'Bromé	0	1	4	0	0	1
M'Bromé	3	2	1	2	2	1
M'Bromé	0	0	0	0	0	0
M'Bromé	0	0	2	0	0	4
M'Bromé	0	0	0	0	1	4
M'Bromé	0	0	0	0	0	4
M'Bromé	1	2	2	5	5	3
M'Bromé	0	0	0	0	0	3
M'Bromé	0	0	4	0	0	4
M'Bromé	0	0	0	0	0	0
M'Bromé	0	0	4	0	0	1
M'Bromé	0	0	4	0	0	0
M'Bromé	0	0	4	0	0	4
M'Bromé	0	0	0	0	0	0
M'Bromé	0	1	0	0	0	0
M'Bromé	0	0	1	0	0	2
M'Bromé	0	0	0	0	0	0
M'Bromé	0	0	4	0	0	4
M'Bromé	0	0	4	0	0	1
M'Bromé	0	0	0	0	0	0
M'Bromé	0	0	4	0	0	0
M'Bromé	0	0	4	1	0	0
M'Bromé	0	0	4	0	0	2
M'Bromé	0	0	0	0	0	0
M'Bromé	0	0	0	0	0	0
M'Bromé	0	0	0	0	0	0
M'Bromé	0	0	1	0	0	2
M'Bromé	0	0	0	0	0	0
M'Bromé	0	0	4	0	0	0
M'Bromé	0	0	0	0	0	1
M'Bromé	0	0	2	1	0	3
M'Bromé	32	15	3	1	8	3
M'Bromé	0	0	0	0	0	0
M'Bromé	0	0	0	0	0	1
M'Bromé	0	0	4	0	0	0
M'Bromé	0	0	0	0	0	0
M'Bromé	0	0	4	0	0	0
M'Bromé	0	0	0	0	0	0
M'Bromé	0	0	0	0	0	1
M'Bromé	0	0	4	0	0	2
M'Bromé	0	0	0	0	0	0
M'Bromé	0	0	1	0	0	2
M'Bromé	0	0	1	1	0	2
M'Bromé	0	0	4	0	0	0
M'Bromé	0	1	4	0	0	1
M'Bromé	0	0	0	0	0	0
M'Bromé	0	0	0	0	0	2
M'Bromé	0	0	4	0	0	1
M'Bromé	0	0	1	0	0	1
M'Bromé	0	0	4	0	0	1
M'Bromé	0	0	4	0	0	4
M'Bromé	0	0	0	0	0	0
M'Bromé	0	0	0	0	0	0
M'Bromé	32	38	3	5	2	3
M'Bromé	0	0	0	0	0	0
M'Bromé	0	0	4	0	0	1
M'Bromé	0	0	1	0	0	1
M'Bromé	0	0	0	0	0	0
M'Bromé	0	0	1	0	0	4
M'Bromé	8	0	3	4	2	3
M'Bromé	0	0	0	0	1	0
M'Bromé	0	0	0	0	0	0
M'Bromé	0	0	4	0	0	4
M'Bromé	0	0	4	0	0	3
M'Bromé	0	0	0	0	0	0
M'Bromé	0	0	0	0	0	4
M'Bromé	0	0	0	0	0	0
M'Bromé	0	0	0	0	0	0
M'Bromé	0	0	0	0	0	0

## Sheet: Kenya
CCA-M1	CCA-M2	CCA-M3	KK-1A	KK-1B	KK-2A	KK-2B	KK-3A	KK-3B
0		0	0	0			0	0
0	0	0	0	0	0		0	0
1	0	1	0	0	0		0
1	1	0	0	0	0		0	0
0	0	0	0	0			0	0
0	0	0	0	0	0	0	0	0
1	1	1	0	0	0	0	0	0
0	0		0	0		0
0	0	0	0	0	0		0	0
0	0	1	0	0	0		0	0
0	0	1	0	0	0		0	0
0	0	1	0	0	0	0		0
2	0	1			0	0	0	0
0	0	0	0	0	0	0	0	0
1	0	1	0	0		0	0	0
0	0	0	0	0	0	0	0	0
0	0	1	0	0	0		0	0
1	1	0	0	0	0	0		0
0	0	0	0	0	0		0	0
0	1	0	0	0				0
0	0	0	0	0	0	0	0	0
0	0	0	0	0	0		0	0
0	0	1	0	0			0	0
0	1	1	0	0				0
2	2	2	60	0		132	36	12
0	1	1	0	0			0	0
0	0	0	0	0	0	0	0	0
0	0	0	0	0	0		0	0
0	1	1	0	0	0	0	0	0
1	0	0	0	0	0	0	0	0
0	1	1	0	0	0	0	0	0
0	0	0	0	0	0	0	0	0
1	1	1	0	0	0		0	0
1	1	1	0	0			0	0
0	0	1	0	0	0	0	0	0
1	1	0					0	0
0	0	0	0	0	0		0	0
0	1	1	0	0	0		0	0
1	1	1	0	0	0	0	0	0
1	0	0	0	0	0			0
0	0	0	0	0	0	0	0	0
0	0	0	0	0	0		0	0
0		1	0	0			0	0
1	1	1	0	0			0	0
1	0	1	0	0	0			0
1	1	1	0	0			24	12
0	0	0	0	0	0	0	0	0
0	1				0	0		0
1	1	1			0	0	0	0
1	1	1			0		0	12
1	0	1			0	0	12	36
1	1	1	0		0	0		0
0	0	1	0	0	0	0	0	0
0	0	0	0	0	0	0	0	0
0	0	0	0	0	0	0	0	0
1	0	1	0	0	0	0	0	0
0	1	1	0	0	0	0		0
0	0	0	0	0	0	0	0
1	0	1	0	0	0	0	0	0
0	1	0	0	0	0	0	0	0
1	1	1	0	0	0	0	0	0
0	0	1	0	0	0		0	0
0	0	1	0	0	0	0		12
0	1	1	0	0	0	0	0	0
0	1	0	0	0	0	0	0	0
2	3	3	60	60	12	48	0	0
0	0	1	0	0	0	0	0	0
1	1	1	0	0	0	0	0	0
0	1	1	0	0	0	0
1	0	0	0	0	0	0	0	0
0	0	0	0	0	0	0	0	0
0	0	1	0	0	0	0	0	0
2	2	2	0	0	0	48	0	0
0	0	1	0	0	0	0	0
1	1		0	0	0	0
1	0	0	0	0	0	0	0	0
0	0	1	0	0	0	0	0	0
1	1	1		0	0	0	0	0
0	1	1	0	0			0	0
0	1	0	0	0	0	0	0	0
3	3		2076	1236	552	468
0	1		0	0	0	0
0	0	0	0	0	0	0	0	0
1	0	1	0	0	0	0	0	0
0	0	1	0		0	0	0	0
0	0	0	0	0	0	0		0
1	1	1	0	0	0	0	0	0
0	0	1	0	0	0	0		0
1	0	1	0	0		0	0	0
0	0	1	0		0	0	0	0
1	1	0	0	0	0	0	0	0
0	1	0	0	0	0	0	0	0
0	0	0	0	0	0	0	0	0
0	1	0			0	0	0	0
0	1	1	0	0	0	0	0	0
0	0	1	0	0	0	0	0	0
1	1	1	0	0	0	0		0
0	1	1	0	0	0	0	0	0
0	1	0	0	0	0	0	0	0
0			0	0
0	0	1	0	0			0	0
0	1	1		0	0	0		0
1	3	3	48	264	288	254	180	192
0	1	1	0	0	0	0	0	0
0	0	1	0	0	0	0		0
0	0	1	0	0	0	0	0	0
1		1	0	24			0	0
1	0	0	0	0	0	0	0	0
0	1	0	0	0	0	0	0	0
1	0	0	0	0	0	0	0	0
1	0	1	0	0	0	0	0	0
0	1	0	0	0		0	0
1	0	1	0	0	0	0	0
1	1	0	0	0	0	0	0	0
0	1	0	0	0	0	0	0	0
1	1	1	0	0	0	0	0
2	3	3	492	336	804	480	252	348
1	1	1	0	0	0	0	0
0	1	0	0	0	0	0	0	0
1	1	1	0	0	0	0	0	0
1	1	1	12	0	0	0	0	0
	1	1			0	0	0
1	0	1	0	0	0	0	0
0	0	0	0	0			0	0
0	0	1	0	0	0	0	0	0
0	0	0	0	0	0	0	0	0
0	0	0	0	0	0	0	0	0
1	1	1	0	0	0	0	0	0
1	1	0	0	0	0	0	0	0
1	0	0	0	0	0	0	0	0
0	0	0	0	0	0	0	0	0
1	0	1	12	12	0	0	12	12
0	0	1			0	0		0
1	0	0	0	0	0	0	0
1	0	1	0	0	0	0	0	0
0	0	1	0	0	0		0	0
2	0	0	0	0	0	0	0
0	0	1	0	0	0	0	0
1	1	1	0	0	0	12		0
0	1	0	0	0	0	0	0
0	0	0	0	0	0	0	0	0
0	0	0	0	0	0	0	0
1	0	0	0	0	0	0	0	0
1	1	0	0	24	0	24	0	0
1	0	0			0	0	0
0	0	0		0	0	0	0
0	1	1	0	0	0	0	0
1	1	0	0	0	0	0	0	0
0	0	0	0	0	0	24	0
2	2	2	252	360	33.5	24	348	336
0	1	0	0	0	0	0	0	0
0	0	0	0	0	0	0	0	12
2	0		0	0	0	0
1	1	2	0	0	156	12	0
1		1	72	36		0	0	0
0	1	0	0	0	0	0	0
0	1	1	0	0	0	0	0	0
0	0	0		0	0	0	0	0
0	1	1	0	0	0	0	0	0
0	1	0	0	0	0	0	0	0
1	1	1	0	0	0	0	0	0
0	0	0	0	0	0	0	0	0
1	0	0	0	0	0	0	0	0
0	0	0	0	0	0	0		0
1		0	0	0	0		0	0
1	0	1	0	0	0	0		0
0	1	0	0	0	0	0		0
0	1	0	0	0	0	0	0	0
0	0	0	0	0	0	0		0
0	0	0	0	0	0	0		0
0	0	0	0	0	0	0		0
0	1	0	0	0	0		0	0
1	0	1	0	0	0	0	0	0
0	0		0	0	0	0	0	0
1	0	0	0	0	0	0		0
1	0	1	0	0	0	0	0	0
0	0	0	0	0	0	0	0	0
1	1	0	0	0	0	0	0	0
1	1	1	0	0	0	0	0	0
1	1	0	0	0	0	0	0	0
1	0	0	0	0	0	0		0
0	0		0	0	0	0
1	1	1	0		12	12		108
0	0	0	0	0	0	0	0	0
0	0	0	0	0	0	0		0
1	1	1	0	0	0	0		0
1	0	0	0	0	0	0	0	0
0		0	0	0			0	0
0	1	0	0	0				0
0	1	0	0	0	0	0		0
0	1		0	0	0	0	0	0
0	0	0	0	0	0	0		0
0	1	0	0	0	0	0		0
0	0	0	0	0	0	0		0
1	1	0	0	0	0	0	0	0
0	0	0	0	0	0	0		0
1	0	0	0	0	0	0	0	0
0	0	0			0	0	0	0
1	0	0	0	0	0	0	0	0
0	0	0	0	0	0	0	0	0
1	1	1	0	0	60	60		0
1	0	0	0	0	0	0		0
0	0	0	0	0	0	0		0
0	1	0	0	0	0	0	0	0
0	0	0	0	0	0	0
1	0	0	0	0	0	0		0
0	0	0	0	0	0	0	0	0
1	1	0	0	0	0	0	0	0
0	0	0	0	0	0	0	0	0
0	1	0	0	0	0	0	0	0
0	0	0	0	0	0	0		0
0	1	0	0	0	0	0
0	0	0	0	0		0	0	0
0	0	0	0	0	0	0		0
0	0	0	0	0	0	0	0	0
0	0	0	0	0	0	0	0	0
1	0	0	0	0	0	0		0
0	0				0	0
0	1	1	0	0	0	0		0
1	0		0	0	0	0
1	1	1	0	0				0
0	0	0			0	0	0	0
2	2	2	0	144	84	96	0	24
0	0	0	0	0	0	0		0
	0	0			0	0	0	0
0	0	0	0	0	0	0	0	0
0	0	0	0	0	0	0
0	0	0	0	0				0
0	0	0	0	0	0	0
0	0		0	0	0	0
0	0	0	0	0	0	0		0
0	0	0	0	0	0	0		0
1	0	0	0	0	0	0		0
0	0	0	0	0	0	0		0
1	0	1	0	0	0	0	0	0
0	0		0	0	0	0		0
0	0	0	0	0	0	0		0
0	0	0	0	0	0	0		0
0	1	1	0		0	0	0	0
0	0	0	0	0	0	0		0
1	1	1	0	0	0	0		0
0	1	0	0	0	0	0
0	0	0	0	0	0	0	0	0
0	0	0	0	0	0	0	0	0
	0				0	0
	0				0	0
0	0	0	0	0	0	0		0
0	1		0	0	0	0
0	0	0	0	0	0	0		0
1	1	1	0	12	0	12	0	0
0	0	0	0	0	0	0		0
0	1	0	0	0	0	0
0	0	0	0	0			0	0
	0	0			0	0	0	0
	0	0			0	0	0	0
	1	0			0	0		0
	0	0			0	0	0	0
	0	0			0	0		0
	1	2				168		84
	0	0			0	0		0
	0	0			0	0		0
	0	0					0	0
	0				0	0
0	0	0	0		0	0	0	0
0	0	0	0	0	0	0	0	0
0	0	0	0	0	0	0	0	0
0	0	0	0	0	0	0	0	0
0		0	0	0			0	0
0	1	0	0	0	0	0	0	0
0	0	1	0	0	0	0	0	0
0	0	0	0	0	0	0	0	0
0	0	0	0	0	0	0	0	0
0	1	0	0	0	0	0	0	0
0	0	0	0	0	0	0	0	0
1	3	3	0	0	0	0	96	0
0	0	0	0	0	0	0	0	0
0	0	0	0	0	0	0	0	0
0	0	0	0	0	0	0	0	0
0	0	1	0	0	0	0		108
0	1	1	0	0	0	0	0	0
0	1	0	0		0	0	0	0
0	1	0	0	0	0	0	0	0
0	1	0	0	0	0	0	0	0
0	0	0	0		0	0	0	0
0	0	0	0	0	0	0	0	0
0	1	0	0	0	0	0	0	0
0	1	0	0	0	0	0	0	0
0	1	0	0	0	0	0	0	0
0	1	0	0	0	0	0	0	0
0	1		0	0	0	0
0	1	1	0	0	0	0	0	0
0	0	1	0	0	0	0	0	0
0	1		0	0		0	0	0
0	0	0	0	0	0	0	0	0
0	0	0	0	0	0	0	0	0
2	0	1	0	0	0	0	0	0
1	1	0	36	0	0	0	0	12
0	0	0	0	0	0	0	0	0
1	1	2		0	24	36	24	0
1	1	0	0	0	0	0	0	0
0	0	0	0	0	0	0	0	0
			0	0
0	0	0	0	0	0	0	0	0
1	1	1	0	0	0	12	12	24
0	0	1	0	0	0	0	0	0
1	1	0	0	0	0	0	0	0
0	1	0	0	0	0	0	0	0
1	1	0	0	0	0	0	0	0
0	0	0	0	0	0	0	72	12
1	1	1	0	0	0	0	0	0
0	0	0	0		0	0	0	0
0	1	0	0	0	0	0	0	0
0	0	0	0	0	0	0
1	1	1	12	0	0	0	0	0
1	1		108	120	12	24
1	0	0	0	0	0	0	0	0
2	1	0	0	0	0	0	12	12
1	1	2	0	0	432	240	84	108
1	1	0	0	0	0	0	0	0
0	0		0	0	0	0
1	1	1		0	0	0	0	0
	1	1	0		0	0	0	0
0	0	0	0	0	0	0	0	0
1	1	1	0	0	0	0	0	0
0	0	0	0	0	0	0	0	0
1	0	0	0	0	0	0	0	0
1	1	1	12	0	24	0	0	12
1	1		0	0	0	0	0	0
0	0	0	0	0	0	0	0	0
0	0	0	0	0	0	0	0	0
1	1	0	0	0	0	0	0	0
0	0	0	0	0	0	0	0	0
0	0		0		0	0
0	0		0	0	0	0	0	0
0	0	0	0	0	0	0	0	0
1	1	1	0	0	0	0	0	0
0	0		0	0	0	0	12	0
0	1	0	0	0	0	0	0	0
0	0	1	0	0	0	0	0	0
0	1	0	0	0		0	0	0
0	0	0	0		0	0	0	0
1	1	1	12	0	0	0
0	0		0	0	0	0
0	0				0	0
0	0	0	0	0	0	0
2	3		24	12	0	0
0	0	0	0	0	0	0	0	0
1	1	1	0	0	12	12		0
1	3		0	12	0	0
0	0	1	0	0	0	0	0	0
0	1	1	0	0	0	0	0	0
0	0		0	0	0	0	0	0
1	1		0	0	12	0
0	0	0	0	0	0	0	0	0
0			0	0
0	1	1	0	0	0	0	0	0
0	1	1	0	0	0	0	0	0
0	1	1	0	12	0	24	0	24
1	1	1	24	12	0	0	0	0
0	1	1	0	0	0	0	0	0
0	1		0	12	120	228
0	1	1	0	0	0	0	0	0
2	2	1	0	0	0	24	0	0
0	1	1	0		0	0	0	0
1	0	0	0	0	0	0	0	0
0	1		0	0	12	12
1	0	1	0	0		0	0	12
0	1	0	0	0	0	0	0	0
1	2		12	12	12	24
0	0	1	0	0	0	0	0	0
0	1	1	0	0	0	0	0	0
1	3	2	0	0	0	0	0	12
0	0	0	0	0	0	0	0	0
0			0	0
0	0	0	0	0	0	0	0	0
1	2	2	108	96	0	0	0	0
0		0	0	0
0	0	0	0	0	0	0	0	0
1	1	1	0	24	12	0	0	12
1	1	1	0	0	0	0	0	0
1	0		0	0	0	0	0	0
0	1	1	0	0	0	0	0	0
2	3	2	12	0	0	0	0	12
2	2	1	0	12	12	0	84	24
0	0	0	0	0	0	0	0	0
1	1	0	0	0	0	0	0	12
0	0	0	0	0	0	0	0
1	1	1	0	0			0	12
0	0	0	0	0	0	0	0	0
0	0	0	0	0	0	0	0	0
1	0	0	0	0	0	0	0	0
0	2		0	0	0	0	0	0
1	0	1	0	0	0	0	0	0
1	1	1	24	0	0	0	0	36
1	1	1	0	0	0	0	0	0
1	1	1	0	0	0	0	0	0
1	1		0	0	0	0	0	0
0	1	1	0	0	0	0	0	0
0			0	0
2	2	1				0	0	12
1	1	0	0	0	0	0	0	0
0	0	0	0	0	0	0	0	0
1	1	1	0	0	0	0	0	24
1	1	1	0	0	0	0	0	0
1	0	0	0	0	0	0	0	0
1	1	0	0	24	0	12	0	0
0	0		0	0	0	0
0	0	0	0	0	0	0	0	0
0			0	0
0	1	0	0	0	0	0	0	0
0	1	0	0	0	0	0	0	0
1	1	1	0	0	0	0	0	0
0	0	0	0	0	0	0	0	0
1	0	1	0	0		0	0
0	0	0	0		0	0	0	0
0	0	0	0	0	0	0	0	0
1	0	1	0	48	0	12	0	0
1	0	0	0	0	0	0	0	0
1	1	1	0	0	0	0	0	0
0	0	0	0	0	0	0	0	0
1	0	1	0	0	0	0	0	0
1	0	0	0	0	0	0	0	0
1			0	0
1	1	0	0	0	0	0	0	0
0			24	12
0	0	0	0	0	0	0	0	0
1	0		0	0
1	0	0	0	0	0	0	0
1		1	0	0
1	0		0	0	0	0	0	0
3			96	72
0	1	1	0	0	0	0	0	0
0	0		0	0	0	0
1	0	0		0	0	0	0	0
1	1	1	0	0	0	0	0	0
1	1		0	0	0	0
1		0	0	0	0	0	0	0
1	0		12	0	0	0
1	1	1	0	0	0	0	0	0
1	1	1	0	0	0	0	0	0
0	0	0	0	0	0	0	0	0
2			228	108
1	0		0	0	0	0
1			0	0
1			0	0
1	1	1	0		0	0	0	0
2	3		0	60	0	0
1	1		0	0	0	0
3	3		0	12	108	36
1	0	0	0	0	0	0	0	0
0	1	0	0	0	0	0	0	0
1			0	0	0	0
0	0	0	0	0	0	0	0	0
1			0	0
0	1		0	0		0
1	1	0	0	0	0	0	0	0
0	0	0	0	0	0		0	0
0	0		0	0	0	0
1			0	0
1	0	1	0	0		0	0	0
2	1	2	0	24	0	0	0	0
1	0	1	0	0	0	0	0	0
0	0		0	0	0	0
1			0	24
1	1	1	0	0			0	0
0			0	0
1	0	0	0	0	0	0	0	0
2	0	0	0	0	0	0	0	0
0		0	0	0			0	0
1		1	0	0			0	0
0		0	0	0			0	0
0	0	0	0	0	0	0	0	0
0	1	0	0	0	0	0	0	0
2	3	2	156	264	360	180	12	12
0		0	0	0			0	0
0	0		0	0	0	0
0		0	0	0			0	0
0		0	0	0			0	0
0	1	1	0	0	0	0	0	0
0	0		0	0	0	0
0	0	0	0	0	0	0	0	0
0	0	0	0	0	0	0	0	0
1	0	0	0	0	0	0	0	0
0			0	0
0		0	0	0	0	0	0	0
0	0		0	0	0	0
0	0	0	0	0	0	0	0	0
0	0		0	0	0	0
0			0	0
0			0	0
1		0	0	0			0	0
0			0	0
0	0	0	0	0	0	0	0	0
1	0	0	0	0	0	0	0	0
0		0	0	0			0	0
1	1	1	0	0	0	0	0	0
0	0	0	0	0	0	0	0	0
1	0		0	48	12	0
3			132	228.5
3			156	144
0			0	0
1	0		0	0	0	0	0	0
0			0	300
1		1	0	0			0	0
1			24	0	0	0
1	1	2	0	120	0	12	0	36
2	2	2	12	84			84	156
0	0	0	0	0	0	0	0	0
1			0	0
2	2		24	144	24	36	24	24
1	1	1	0	0	0	24	60	48
1	3		108	132	228	228	120	60
0	1	1	0	0	0	12	0	36
0		1	0	0	0	0	0	0
1	1	1	0	0	0	0	0	0
2	2	2	0	0	12	24	0	84
0	0	0	0	0	0	0	0	0
0	1	1	36	24	0	0	0	24
2	1	1	84	48	276	108	24	24
1	1	0	0	0	0	0	24	0
0	1	0	0	0	0	0	0	0
1	1		0	0	12	0
0	0	0	0	0	0	0	0	0
2	1	1	0	12	0	12	0	0
1	1		0	12	0	24
1	1	1		0	0	0	0	0
1	1		0	0		0	0	0
1	2	2	108	60	72	108	0	0
0	0	0	0	0	0	0	0	0
1			60	12
0	0		0	0	0	0	0	0
2	2		60	12	0	0	0	48
0	0	0	0	0	0	0	0	0
1	1		0	0	0	0
3		3	48	156	12	24	0	0
1		1	96	96			0	0
3			36	72
1	1		0	0	0	0
1			0	12
3	3	3	24	0	0	0	264	96
2	1		0	24	0	0
0	0	0	0	0	0	0	0	0
0	0		0	0	0	0
0			0	0
0	0	0	0	0	0	0	0	0
0			0
0	0	0	0	0	0	0	0	0
0			0	0
0	0	0	0	0	0	0	0	0
0			0	0
1			0	0
1	1		0	0	0	0
1			0	0
1			0	0
1			0	0
0	0	1	0	0	0	0	0	0
1	0	0	0	0	0	0	0	0
0	0	0	0	0	0	0	0	0
0	0	0	0	0	0	0	0	0
1	1		0	0	0	0
1	0		0	0	0	0
1			0	0
2	0		0	0	0	0
1	1	0	0	0	0	0	0	0
0			0	0
0			0	0
0	0	1	0	0	0	0	0	0
1	0	0	0	0	0	0	0	0
1		1	0	0			0	0
0		0	0	0			0	0
1	0	0	0	0	0	0	0	0
0		0	0	0			0	0
0			0	0
0		1	0	0			0	0
1		1	0	0			0	0
0			0	0
1			0	0
0		0	0	0			0	0
1	0		0	12	0	0
0	0		0	0	0	0
0		1	0	0			0	0
1	1	1	0	0	0	0	0	0
1	1	1	0	0	0	0	0	0
0	0	0	0	0	0	0	0	0
1	1		0	0	0	0	0	0
1	1	1	0	0	0	0	0	0
1		0	0	0	0	0	0	0
	0		0	24	0	0
1		1	0	0
1	1	1			0	0	0	0
1		1	0	0	0	0	0	0
1	1	1	0	0	0	0	0	0
0	1	0	0	0			0	0
0	0	1	0	0	0	0	0	0
1	1	1	0	0	0	0	0	0
1	1	1	0	0	0	12	0	0
1	0		0	0	0	0
1			0	0
2	2		0	12	0	12
1	1				0	0
			0	0			0	0
	1		0	0	0	0
			0	0
			0	0
		1	0	0			0	0
3	3	3	432	432			0	0
0			0	0
1	0		0	0	0	0
1	1	1	0	36	0	0	0	0
1		1			24	24	0	0
0	0	0	0	0	0	0	0	0
1			0	0
1		1	0	0			0	0
1	1		0	0	0	0
0	0	0	0	0	0	0	0	0
0	0	1	0	0	0	0	0	0
	3		0	252	0	12
0	0	0	0	0	0	0	0	0
0	0	0	0	0	0	0	0	0
1	0	0			0	0	0	0
0	1	0	0	0	0	0	0	0
1	1	1	0	0	0	0	0	0
0	0	0	0	0	0	0	0	0
0	1	0	0	0	0	0	0	0
0	1	1	0	0	0	0	0	0
0	1	0	0	0	0	0	0	0
0	1	0	0	0	0	0	0	0
0		0	0	0			0	0
0	0	1	0	0	0	0	0	0
0	0	0	0	0	0	0	0	0
2		2	0	0			0	0
1	1	0	0	0	0	0	0	0
1	1	0	0	0	0	0	0	0
0	2	0	0	0	0	0	0	0
1	1		0	0	0	0
1	1	1	0	0	0	0	0	0
0	0	0	0	0	0	0	0	0
0	1	0	0	0	0	0	0	0
1		0	0	0	0	0
0	1	0	0	0	0	0	0	0
1	1	0	0	0	0	0	0	0
0	0	0	48	0	0	0	0	0
0	0	0	0	0	0	0	0	0
2	2	2	0	0	0	0
0	1	1	0	0	0	0	0	0
1	1	0	0	0	0	0	0	0
1	1	1	0	0	0	0	0	0
1	1	0	0	0	0	0	0	0
0		0	0	0			0	0
2	2	2	0	0	96	134	96	96
0	0	0	0	0	0	0	0	0
0	0	0	0	0	0	0	0	0
0	0	0	0	0	0	0	0	0
0	1	1	0	0	0	0	0	0
0	0	0	0	0	0	0	0	0
1		0	0	0			0	0
0		0	0	12	0	0	0	0
0	1	0	0	0	0	0
1	0	0	0	0	0	0	0	0
1	1	0	0	0	0	0	0	0
1	1		0	0	0	0
1	1	0	0	0	0	0	0	0
0	0	0	0	0	0	0	0	0
1	1	0	0	0	0	0	0	0
1	0	0	0	0	0	0	0	0
0	0	0	0	0	0	0	0	0
1	1	0	0		0	0
1		0	0	0			0	0
1		1					0	0
0	0	0	0	0	0	0	0	0
0		0	0	0			0	0
1		0	0	0			0	0
0	0	0	0	0	0	0
1	2		0	0	0	0
0	0	0	0	0	0	0	0	0
0	1	0	0	0	0	0	0	0
0	0	0	0	0	0	0	0	0
0	0	1	0	0	0	0	0	0
1	1	1	0		0	0	0	0
0	0	0	0	0	0	0	0	0
2	0	1	0	0	0	0	0	0
0	0	0	0	0	0	0	0	0
0			0	0	0	0
0	0	0	0	0	0	0	0	0
0	0	1	0	0	0	0	0	0
0			0	0
0	1	1	0	0	0	0	0	0
0	1	1	0	0	0	0	0	0
1	1	1	0	0	0	0	0	0
0	1	1	0	0	0	0	0	0
0	0	0	0	0	0	0	0	0
0	0	0	0	0	0	0	0	0
0	0	0		0	0	0	0	0
0	0	0	0	0	0	0	0	0
0	0	1	0	0	0	0	0	0
1	0	1	0	0	0	0	0	0
0	0	1	0	0	0	0	0	0
0	0	0	0	0	0	0	0	0
0	0	1	0	0	0	0	0	0
1	0	0	0	0	0	0	0	0
1	0	0	0	0	0	0	0	0
2			0	0
0			0	0
0	0	0	0	0	0	0	0	0
0	0	0	0	0	0	0	0	0
0	0	0	0	0	0	0	0	0
0	0	1	0	0	0	0	0	0
1	1	1	0	0	0	0	0	0
0	0	0	0	0	0	0	0	0
0	0	0	0	0	0	0	0	0
0	0	0	0	0	0	0	0	0
0	0	0	0	0	0	0	0	0
0	0		0	0	0	0
1	0	0	0	0	0	0	0	0
1	0	1			0	0	0	0
0	0	0	0	0	0	0	0	0
0	0	0	0	0	0	0	0	0
0	0	0	0	0	0	0	0	0
1	1	0	0	0	0	0	0	0
0			0	0
0	1	1	0	0	0	0	0	0
1	1	1	0	0	0	0	0	0
0	0	1	0	0	0	0	0	0
0	0	0	0	0	0	0	0	0
1	1	1	0	0	0	0	0	0
0	1	1	0	12	0	12	0	0
1	1	1	0	0	0	0	0	0
2	1	3	636	780	204	288	0	0
0	0	1	0	0	0	0	0	0
1	0	0	0	0	0	0	0	0
0	0	1	0	0	0	0	0	0
1	1	1	0	0	0	0	0	0
1	1	1	0	0	0	0	0	0
1		1	0	0			12	0
1	1	1	0	0	0	12	0	0
0	0	1	0	0	0	0	0	0
0	1	0	0	0		0	0	0
1	0	1	0	0	0	0	0	0
1		0	0	0			0	0
1		1	0	0			0	0
3	1	1	0	0	12	12	0	0
0	0	0	0	0	0	0	0	0
1	0	0	0	0	0	0	0	0
1	1	1	0	0	0	0	0	0
1	1	0	0	0	0	0	0	0
0	0	0	0	0	0	0	0	0
0	0	0	0	0	0	0	0	0
1	1	1	0	0	0	0	0	12
3	3	3	612	648	0	0	156	336
2			0	12
1	1	1	0	0	0	0	24	24
2	1	1	0	0	0	0	0	0
0	0	0	0	0	0	0	0	0
1	1	2	36	72	0	12	0	12
2	2	2	12	48	36	48	0	36
1	0	1	0	0	0	0
2	2	3	120	132	24	36	36	60
0	0	0	0	0	0	0	0	0
2	1	1	0	0	0	12	0	12
1	1	1	0	0	0	0	0	0
1	2	3			0	12
1	1	1	0	0	24	36	0	0
1	2	2	48	36	36	60	0	60
2	2	1	36	48	0	12	0	0
0	0	0	0	0	0	0	0	0
2	2	3	276	264	192	240	108	516
1	1	1	0	0	0	0	0	0
1	1	0	0	0	12	0	0	0
1		0	0	0				0
1	1	1	0	0	0	0	0	0
2	3	3	60	48	96	84	132	60
3	3	3	12	72	48	36	0	0
1	1	1	0	12	0	0	0	0
1	1	1	0	12	0	0	0	0
1		1	0	0			0	0
1	1	0	0	0	0	0	0	0
1	1	1	0	0	0	0	0	0
2	1		12	24	24	24
2	3	2	24	12	0	12	0	48
0	0		0	0	0	0		0
1			0
1	0	1	12	0	12	12	12	12
2	0	1	0	0	0	24	12	12
0	0	0	0	0	0	0	0	0
1	1	1	0	0	0	0	24	60
1	1	1		0	0	0	0	0
0	0	0	12	0	0	0	0	0
1	1	1	0	0	0	12	84	0
2	2	2	24	0	0	0	144	216
0	0	0		0	0	0	0	0
0	0	0	0	0	0	0	0	0
1	1	3	120	144	168	216	180	216
3	3	3	780	660	48	60	192	36
3	3	3	324	228	180	360	216	132
2	1	1	12	12	0	24	72	60
1	1	1	0	0	0	0	0	0
1	2	2	36	48	0	180	120	48
1	1	1	0	0	0	0	0	0
2	2	2		144	12	24	24	36
0	0	0	0	0	0	0	12	12
1	1	2	72	132	24	36	12	12
1	1	1	0	12	24	36	24	12
1	1	1	0	0	0	0	36	24
0	1	2	96	72	12	12	0	0
1	2	2	0	0	24	86	60	24
3	3	2	36	324	0	156	204	132
3	3	2	60	24	0	0	0	0
1	1	1	24	12	84	144	158	72
2	2	1	0	24	0	0	48	12
1	1	1	0	0	0	0	0	0
1		1	0	0			36	24
1	0			72	24	36
1	1	1	24	12	0	12	0	72
2	2	3		240	0	504	96	48
1	2	2	24	0	0	12		36
0	1	0	0	0	0	0	0	24
1	2	2	0	12	36	60	72	60
2	3	2	72	108	12	24	60	12
2	2	1		36	0	0	12	12
3	3	3	0	0	24	72	0	0
0	1	1	0	0	0	0	0	0
0	0	0	0	0	0	0	0	0
1	1	0	0	0	0	12	0	0
1	1	0	0	0	0	0	0	0
1	1	0	12	24	0	12	0	0
1	1	1	12	48	0	12	0	0
1	1	1	0	0			0	0
1	1	2	12	24	12	12	0	0
0	0	0	0	0	0	0	0	0
1	0	1	0	0	0	0	0	0
3	3	2	0	48	12	24	12	36
1	2	2	12	0	0	12	0	0
0	0	0	0	0	0	0	0	0
0	0	0	0	0		0	0	0
0	0	0	0	0	0	0		0
2	3	2	0	96	48	72	12	24
2	2	2	24	12	0	12	0	0
0	0	0	0	0	0	0	0	0
3	3	3	672	564	108	192		60
1			12	12
0	0	0	0	0	0	12	0	0
2	2	1	12	48	12	12	0	12
1	1	1	0	12	0	24	0	0
2	2	2	0	0	0	0	12	24
3	3	3	276	384	132	252	84	96
1	1	1	12	24	0	0	0	0
1	1	1	0	0	24	12	12	24
0	1	1	0	0	0	0	0	12
1	1	1	0	0	0	0	0	0
0	1	1	0	12	36	24	0	0
1	0	0	0	0	0	0	0	0
0		0	0	0			0	0
1	0	1	0	0	12	12	0	0
1	1	1	0	0	0	0	24	36
1	1	1	0	0	12	0	0	0
1	2	1	12	0	12	12	0	0
1	2	1	48	24	192	96	24	24
3	3	3	24	0	24	12	0	0
0	3	3	396	36	216	72	48	60
0	1	1	0	0	0	0	0	0
1	0		0	0	12	12
0	0	0	0		0	0	0	0
2	1	2	24	0	24	12	0	0
0	0	0	0	0	0	0	0	0
1	1	1	0	0	0	0	12	12
1	2	2	84	24	12	12	0	0
1	0	1	0	0	0	0	12	12
3	3	3	24	12	48	12	0	0
2	0	1	36	24	84	48	24	48
0	2	1	0	0	0	0
2	2	2	84	36	96	12	132	156
0	0	1	0	24
0	0	0	0	0	0	0	0	0
0	1	1	24	108	0	0	0	0
0	0	0	0	0	0	0	0	0
1	1	0	0	0	0	0	0	0
2	2	3	120	24	144	108	0	0
1	1	1			0	0	0	0
1	1	3	24	36	168	132	12	24
2	1	1	0	0	0	0	0	0
0	0	0	0	0	0	0	0	0
0	1	1		0	0	0	0	0
1	0	1	0	0	0	0	0	0
1	1	1	0	0	48	36	0	0
1	1	1	0	0	0	0	0	0
0			0	0
3	2	3	60	0	336	108
1	1	1	96	36	72	60	0	0
2	2	3	84	36	156	84	0	0
1	1	1	36		0	12	0	0
2	1	2	48	0	36	12	0	0
1	1	1	0	0	0	0	0	0
2	2	2		24	96	168	0	0
0	0	0	0	0	0	0	0	0
1	0	1	0	0	0	0	0	0
2	2	3		12	84	24
0	0	0	0	0	0	0	0	0
0	0	0	0	0	0	0	0	0
0	0	0		0	0	0	96	132
1	1	1	0	12	24	0	0	0
0	0	1	0	0	36	24	0	0
1	1	1	96	12	0	0	0	0
1	0	1	0	0	0	0	0	0
1	0	1	0	0	0	12	0	0
2	1		0	12	0	0
2	1	1	0	0	24	12	0	96
1	0	1	24	36	60	48	0	0
2	1	2	48	12	12	12	0
0	0	0		0	0	0	0	0
2	3	2	0	12	0	0	0	12
0	1	1	0	0	0	0	0	0
1	0	0	12	12	0	0	0	0
1	1	1	0	0	0	0	0	0
1	1	1	0	0	0	0	0	0
0		1	0	0		0	0	0
0	0	0	0	0	0	0	0	0
0	1	1	0	0	0	0	0	0
0	1	1	0	0	0	144	0	0
1	0		0	0	0	0
1	0	0	0	0	0	0	0	108
0	1	0	0	0	0		0	0
1	1		0	0	0	12		12
2	3	2	48	12	24	36	24	36
2	3	3	72	96	0	324	24	96
1	1	1	12	12	0	0	0	0
0	0	0	0	0	0	0	0	0
1	0	1	0	0	0	0	0	0
1	0	1	0	0	0	0	0	0
2	3	3	1524	1440	0	1920	1166	936
1	1	1	0	0	0	0		0
1	1	1	0	0	0	0	0	0
0	1	1	0	0	0	0	0	0
1	0	0	0	0	0	0	0	0
1	1	1	60	24	0	0	0	0
1	0	0	0	0	0	0	36	0
0	0	0	0	0	0	0	0	0
1	1		0	0	0	0
1	1	1	0	0	1620	0	12	0
2	1	1	180	0	0	144	12	12
0	0	0	0	0	0	0	0	0
2	2	2	24	24	0	0	0	0
1	1	1	0	0	0	0	12	12
1	0	0	0	0	0	0	0	0
0	0	0	0	0	0	0	0	0
0	0	0	0	0	0	0	0	0
1	1	1	0	0	60	0	0	0
1	1	1	0	0	0	0	0	0
1	1	1	0	0	0	0	0	0
1	2	1	0	0	0	0	0	0
1	1	1	0	180	12	12	0	0
1	1	1	0	0	0	0	0	0
1	0	0	0	0	192	0	0	0
1	0	1	0	0	0	0	0	0
0	1		0	0	0	12
0	0	0	0	0	132	0	0	0
1		1	48	12			12	0
1	3	3	228	12		12	36	252
1	1	1	12	12	0	0	0	0
0	1	1	0	0	0	0	0	0
1	0	0	0	0	0		0	0
1	1	1	0	0	0	0	0	0
1	1	1			36	12	48	36
1	1	1		0	0	0	12	0
2	2	3	60	24	204	96	48	48
1	1	1	12	12	74	12	0	48
1	0	1	0	0	0	12	0	12
1	1	1	0	0			0	0
1	1	1	24	0	0	0	0	0
1	1	1	0		0	0	0	0
0	1		24	12	0	0
0	0		0	0	0	0	0	0
1	2	1	0	0	0	0	0	0
2	2	1	192	0	24	60	24	0
1		1	0	0			0	0
1	1	1	0	0	0	0	0	0
1	1	1	0	0	0	12	0	0
	1	1			0	0	0	0
	1	1			0	12	60	36
	1	2			0	12	0	0
0	0		0	0	0	0
1	0	0	0		0	0
0	0	0	0	0	0	0	0	0
1	1		0	0	0	0
0	0	1	0	0	0	0	12	24
1	1	1	0	0	0	0	0	0
1	0	0	0	0	0	0	0	0
0	0		0	0	0	0
2	1	1	0	0	0	0	0	0
0	0	0	0	0	0	0	0	0
0	0	0	0	0	0	0	0	0
0	1	0	0		0	0	0	0
0	0	0	0	0	0	0		0
1	1	1	0	0	12	0	0	0
0	0	0	0	0	0	0	0	0
1	1	1	0	12	0	0	0	0
1	0		0		0	0		12
0	1	1	0		0	0	0	0
0	1	1	0	0	0	0	0	0
1	1	1		0	0	0	0	0
0	0	0	0	0	0	0
1	1	1	0	0	0	0	0
2	2		0	48	36	72
0	1	2	0	0	0	0	0	0
1	1	0	0	0	0	0	0	0
1	1	1	0	0	0	0	0	0
1	1	1	0	0	0	0	0	0
1	1	1	0	24	0	0	0	0
0	0	0	0	0	0	0	0	0
0	0	1	0	0	0	0	0	0
1	0	1	0	0	0	0	0	0
0	1	1	0	0	0	0	0	0
1	1	1	0		0	0	0
0	0	0	0	0	0	0	0	0
1	1	1	0	0	0	0	0	0
0	0	1	0	0	0	0	0	0
1		1	0				0	0
0		1	0	0				0
1		1	0	0			0	0
1	1	1	0	0	0	0		0
0	0	0	0	0	0	0	0	0
0	0	0	0	0	0		0	0
0	0	1	0	0	0	0		0
0	0	1	0	0	0	0	0	0
0	0	0	0	0	0	24	0	0
0	0		0	0
0	1	0	0	0	0	0	0	0
0	0	0	0	0	0	0	0	0
1	1	1			24	0	12	0
0	0	0	0	0	0	0	0	0
1	0	1	0	0	0	0	0	0
0	0	0	0	0	0	0	0	0
0	0	0	0	0	0	0		0
0	0	0	0	0	0	0	0	0
0	0	0	0	0	0	0	0	0
1	0	1	0	0	0	0	0	0
1	0	0	0		0	0	0	0
1	0	0	0	0	0	0	0
1	1	1	0	0	0	0	0	0
0	0	0	0	0	0	0	0	0
0	0	0	0	0	0	0	0	0
0	1	0	0	0	0	0	0	12
	1	1			0	0	0	0
0	0	0	0	0		0	0	0
0	1	0	0		0	0	0	0
0	0	1	0	0	0	0	0	0
0	1	0	0		0	0	0	0
1	1	0	0	0	0	0	0	0
0	0	0	0	0	0	0	0	0
1	1	1	0	0	0	0	0	0
1			0	0
0	0	0	0	0	0	0	0	0
0	0	0	0	0	0	0	0	0
0	0	0			0	0	0	0
1	0	0	0	0	0	0	0	0
0	0	0	0	0	0	0	0	0
1	1	1	0	0	0	0	0	0
1	1	1	0	0	0	0	0	0
0	0	0	0	0	0	0	0	0
1	1	1	0	0	0	0	0	0
0	1	1	0	0	0	0	0	0
1	0	0	0	0	0	12	0	0
1	1	1	0	0	0	0
1	1	1	0	0	0	0	0	0
1	1	1	0	0	0	0	0	0
0		0	0	0			0	0
1	1	1	0	0	0
1	1	0	0	0	0	0	0	0
0	0	0	0	0	0	0	0	0
1	1	0	0	0	0	0	0	0
0	0	0	0	0	0		0	0
1	1	0	0	0	0	0	0	0
1	1	1	0	0	0	0	0	0
1	1	1	0	0	0	0	0	0
1	1	1	0	0	0		0	0
0	0	0	0	0	0	0	0	0
1	1	1	0	12	24	12	0	0
1	1	1	0	12	12	24	0	0
1	1	1	0	0	0	0	0	0
1	1	1	0	0	0	0	0	0
1	1	1	0	0	0	0	0	0
1	1	1	0	0	0		0	0
1		1	0	0	0	0	0	0
1			12	12
1	1	1	0	0	0	0	0	0
1	1	1			0	0	0	0
0	0	1	0	0	0	0	0	0
0	1	1	24	12	36	24	0
2	2	2	132	0	0	0	144	60
1	1	1	0	0	0		0	0
1		1	0	0
1	0	0	0	0	0	0	0	0
0	0	0	0	0	0	0	0	0
1	1	1	0	0	0	0	0	0
0	1	0	0	0	0	0	0	0
1		0	0				0	0
1	1	1	0	0	0	0	0	0
1	1	1	0	0	0	0	0	0
1	1	1	0	0	48		0	12
1	1	1	0	0	0	0	0	0
1	1	1	0	0	0	0	0	0
0	0	0	0	0	0	0	0	0
0	0	0	0	0	0		0	0
0			0	0
1	1	1	0	0	0	0	0	0
1	1	1	0	0	0		0	0
1	1		0	0	0	0
2	2	1	0	0	192	108	0	0
1	1	1	0	0	60	0	48	0
1	0	0	0	0	0	0	0	0
1	1	1	0	0	0	0	0	0
1	1	1	0	0	0		0	0
1	1		24	36	12	0
1	0	0	0	0	0	0	0	0
2	1	2	0	0	0	0	0	12
0	0	0	0	0	0	0	0	0
0	1	0	0	0	0	0	0	0
0	0	0	0	0	0	0		0
1	0	1	0	0	0	0	0	0
0	0	0	0	0	0	0	0	0
0	0	1	0	0	0	0	0	0
0	1	1	0	0	0	0	0	0
0	0	0	0	0	0	0	0	0
1	1	0	0	0	0	0	0	0
1	0	1	0	0	0	0	0	0
0	0	0	0	0	0	0	0	0
0	0	0	0	0	0	0	0	0
1	1	0	0	0	0	0	36	0
1	1	0	0	0	0	0	0	0
0		1	0	0			0	0
0	0	0	0	0	0	0	0	0
3	3	2	0	48	120	216	24	72
0	0	0	0	0	0	0	0	0
2	1	1	0	24	0	0	0	0
0	0	0	0	0	0	0	0	0
1	1	0	0	0	0	12		0
0	0	0	0	12	0	0	0	0
1	0	0	0	0	0	0	12	12
	0	0			0	0	0	0
	1	1			0	0	0	0
0	0		0	0	0			0
2	2	1	36	12	0	84	36	36
1	1	0	0	0	0	0	0	0
1	0	0	0	0	0	0	0	0
1	1	1	0	0	0	0	0	0
0	0	0	0	0	0	0	0	0
0	0	0	0		0	0	0	0
1	1	1	0	0	0	0	0	0
1	1	1	0	0	0	0	0	0
0	0	0	0	0	0	0	0	0
1	1	1	0	0	0	0	0	0
0	0	0	0	0	0	0	0	0
1	1	1	0	0	0	0	0	0
0	0	0	0	0	0	0	0	0
0	0	0	0	24	0	0	0	0
1	1	1	0	0	0	0	156	108
0	0	0	0	0	0	0	0	0
1	1	0	0	0	0	0	0	0
1	1	1	0	0	0	0	0	0
2	2	1	36	0	0	60	0	60
	1	1			0	0	0	0
1	1	1	0	0	0	0
0	0	0	0	0	0	0	0	0
1	1	1	0		0	0	0	0
1	1	1	0	0	0	48	0	12
1	1	1	0	0	0	0	0	0
0	0	1	0	0	0	12	0	0
1	1	1	0	0	0	0	0	0
0	0	0	0	0	0	0	0	0
1	0	0	0	0	0	0	0	0
1	1	0	0	0	0	0
0	0	0	0		0	0	0	0
0	0	0	0	0	0	0		0
0	0	0	0	0	0	0	0	0
0			0	0
1	1	1	0	0	0	0	0	0
0	1	0	0	0	0	0	0	0
0	1	0		0	0	0	0
1	1	1	0	0	0	0	0	0
2	2	2	0	0	0	108	0	0
0	1	1	0	0	0	0	0
1	1	1	0	0	0	0	0	0
1	1	1	0	0	0	0	0
1	1	1	0	0	0	0	0
1	1	1	0	0	0	0	0	0
0	0		0	0	0	0
0	0	0	0	0	0	0	0	0
0		0	0	24			0
1	1	1	0	0	12	12	0	12
0	0	0	0	0	0	0	0	0
1	1	1	0	0	0	0	0
0	0	1	0	0	0	0	0	0
1	0	0	0	0	0	0	0	0
0	0	0	0	0	0	0	0
1	1	1	0	0	0	0	0	0
0	1	0			0	0	0	0
0	0	0	0	0	0	0	0
0	1	0	0	0	0	0	0	0
1	1	0	0	0	0	0	0	0
1	1	1	0	12	0	12	0	0
1		1	0	12		0	0	0
0	1	0	0	0	0	0	0	0
1	1	1	0	0	0	0	0	0
0	1	1	0	0	0	0	0
0	0	0	0	0	0	0	0
0	1	1	0	0	0	0	0	0
1	1	0	0	12	0	12	0	0
0	0	0	0	0	0	0	0	0
0	0	0	0	0	0	0	0
1		2	0	12			0	24
0	0	0	0	0	0	0	0	0
1	1	1	0	0	0	0	0	0
0	0	0	0	0	0	0	0
0	0	0	0	0	0	0	0
1	0	0	0		0	0	0
0	0	0	0	0	0	0	0	0
0	1	0	0	0	0	0	0	0
0	0	0	0	0		0	0
0	0	0	0	0	0	0	0	0
0	0	0	0	0	0	0	0	0
1	1	1	0	0	0	0	0	0
0	0	0	0	0	0	0	0	0
1	1	1	0	0	0		0	0
0	0	0	0	0	0	0	0	0
1	0	0	0	0	0	0	0
0	0	0	0	0	0	0	0	0
1	1	0	0	0	0	0	0	0
0	0	0	0	0	0	0	0	0
0	0	0	0	0	0		0	0
1	1	1	0	0	0	0	0	0
1	1	1	24	0	0	0	0	0
0	0	0			0	0	0	0
0	0	0	0	0	0	0	0	0
1	1	0	0	0	0	0	0	0
0	0	0	0	0		0	0	0
1	0	1	0	0	0	0	0	0
1	1	1	0	0	0	0	0	0
0	1	0	0	0	0	0	0
1	1	0	0	0	0	0	0	0
1	1	1	0	0		0	0	0
1	0	0	0	0	0	0	0	0
1	0	0	0	0	0	0	0	0
0	0	0	0	0	0	0	0	0
1	0	0	0	0	0	0	0	0
1	1	1	0	0	0	0
1	0	0	0	0	0	0	0	0
0	0	0	0	0	0	0	0
0	0	0	0	0	0	0	0	0
0	0	0	0	0	0	0	0	0
0	0	0	0	0	0	0
	1	0			0	0	0	0
0	0	0	0	0	0	0	0	0
	0	0	0	0
0	0	0	0	0	0	0	0	0
0	0	0	0	0	0	0	0	0
0	0	0	0	0	0	0	0	0
0	1	1	12	12	0	0	0	0
0	0	0	0	0	0	0
1	1	1	0	0	0	36.5	0	0
1	0	1	0	0	0	0	0	0
0	0	1	0	0	0	0	0	0
0	0	0		0	0	0	0	0
0	1	0	0	0	0	0	0	0
0	0	0			0	0	0	0
0	0	0	36	36	0	0	0	0
1	3	3	0	0	144	48	348	348
0	1		0	0	0	0
1	0	0	0	0			0	0
0	1		0	0	0	0
1	1	1	0		0		0	0
2	3	2	0	0		0	0	0
1	1	1	0	0		0	0	0
0	1	1	0	36		0	0	0
1	1	2	0	0		48	60	0
1	1	1	0	0	0	0	0	0
1	0	1	0	0		0	0	0
0	0	0	0	0		0	0	0
0	0	0	0	0	0	0	0	0
2	2	2	108	24		180	528	132
1	1	1	0	0	0	0	0	0
0	0	0	0	0		0	0	0
0	0	0	0	0		0	0	0
0	0	0	0	0	0	0	0	0
0	0	0	0	0		0	0	0
1		1	0	0			0	0
1	1	1	0	0		0	0	0
1	1	1	0	0	24	12	0	0
1	0	1	0	0		0	0	0
1	0	0	0	0		0	0	0
1	1	0	0	0	0	0	0	0
0	1	1	0	12		0	0	0
0	0	0	0	0		0	12	0
0	0	0	0	0		0	0	0
0	1	0	0	0	0	0	0	0
1	1	1	0	0		0	0	0
0	0	0	0	0	0	0	0	0
0	0	0	0	0		0	0	0
0		0	0	0			0	0
1	1	1	0	0	0	0	0	0
0	1	0	0	0		0	0	0
1	1	1	0	0	0	0	0	0
0	0	0	0	0	0	0	0	0
1	1	1	0	0		0	0	0
0	0	0	0	0		0	0	0
0	0	0	0	0		0	0	0
0	0	0	0	0		0	0	0
1	1	1	24	2	0	0	0	0
1	0	1	0	0	0	0	0	0
1	0		0	0	0	0	0	0
1	2	1	36	0	96	0	24	36
1	1		0	0	0	0		0
1	2	1	0	0	24	12	0	0
1	0	0	0	0	0	0	0	0
1	1	1	0	0	0	0	0	0
1	1		0	0	0	0		0
1	0		0	0	0	0		0
1	1		0	0	0	12		0
1	3		0	0	72	24		0
1	1		0	0	0	0		0
1	1		0	0	0	0		0
1	1		0	0	0	0		0
1	1		0	12	0	0		0
1	1	1	0	0	0	0	0	0
1	1	1	0	0	0	0	0	0
1	0	0	0	0	0	0	0	0
2	3		0	0	300	120		48
1	1		0	0	0	0		0
1	2		0	0	0	0		0
1	0	0	0	0	0	0	0	0
1	1		0	12	0	0		12
1	1		0	0	0	0		0
1	1		0	0	0	0		0
1	1	1	0	0	0	0	0	0
1	1	1	0	0	0	0	0	0
1	1	1	0	0	0	0	0	0
1	1		0	0	0	0		0
1	1	1	0	0	0	0	0	0
1	2	3	0	0	48	12	0	48
1	1	1	0	0	0	0	0	0
1	2	3	12	36	0	60	24	0
1	1	1	0	0	0	0	0	0
1	0	0	0	0	0	0	0	0
1	0	0	0	0	0	0	0	0
3	1		0	60		0		60
1	1	1	0	12	0	24	0	24
1	3		120	168	120	36		60
1	1	1	0	0	0	0	0	0
3	3	3	0	24	0	12	132	0
1	2	3	0	0	0	0	72	48
1	0	1	12	0	24	12	24	24
2	3	3	0	24	0	0	0	0
1	1	1	0	0	0	0	0	0
3	3	3	120	612	0	60	0	384
1	2	2	48	48	0	12	24	12
0	0	0	0	0	0	0	0	0
0		0	0	0		0	0	0
1	0	0	0	0	0	0	0	0
3	2	3	0	36	0	96	180	132
3	1	3	0	12	0	0	24	36
1	1	1	0	0	0	0	0	0
1	1	0	0	0	0	0	36	0
1		3	204	276		288	48	24
1	0	1	0	0	0	0	0	0
1			0	0		0		0
1	0	0	0	0	0	0	0	0
3	3			0	0	0	72	12
1	1	0		0	0	0	0	0
1	0	1	0	0	0	0	0	0
1	1	0	24	0	0	36	0	24
1	2	3		168	0	12	0	24
1	3	3	180	288	180	168	360	144
1		1	0	0		0	0	0
	1	1		0	0	0	0	0
	0	0	24	48	0	0	0	0
1	1		0	0		0		0
0	0	0	0	0	0	0	0	0
0	0		0	0	0	0		0
1	1		0	0	0	0		0
0	1	0	0	0	0	0	0	0
0	1	1	0	0	0	0	0	0
1	1	0	0	0	0	0	0	0
1	1	1	0	0	0	0	0	0
1	3	3	24	36	0	12	1584	1296
0	0	0	0	0	0	0	0	0
1	1	1	0	0	0	0	0	0
1	0	1	0	0	0	0	0	0
1	0	1	0	0	0	0	0	0
0	0		0	0	0	0		0
1	1		0	0	0	0		0
0	0		0	0	0	0		0
1	0	0	0	0	0	0	0	0
1	1	1	0	0		0	0	0
1	2	2	132	168	24	110	84	108
0	0	0	0	0	12	12	0	0
0	0	0	0	0	0	0	0	0
1	2	1	120	96	48	60	108	132
0	0	1	0	48	0	0	0	0
1		0	0	0		0	0	0
1	1	1	108	0	0	0	0	0
1		1	0	36		0	12	12
0		1	0	0		0	0	0
0		0	0	0		0	0	0
1	2	2	0	36	12	12	0	36
0	0	0	0	0	0	0	0	0
0	1	1	0	0	0	0	0	0
0	0	0	0	0	0	0	0	0
1		1	0	0		0		0
0	0	0	0	0	0	0	0	0
1	2	3	48	24	60	72	84	120
1	1	0	0	0	0	0		0
0		1	0	0		0	0	12
0	0	0	0	0	0	0	0	0
0	1	1	0	12	0	0	0	0
2	2	2	60	24	96	24	0	0
1		0	0	0		0	0	0
1	1	0	24	12	12	12	0	12
1	0	1	876	12	0	0	0	0
0			0	0		0		0
0	0	0	0	0	0	12	0	0
1	1	1	0	12	0	0	24	36
1	1	1	0	0	0	0	0	0
1	0	3	0	120	96	144	168	228
2		3	0	1140		744	120	120
1		0	228	204		0	96	108
	0	0		0	0	0	0	0
1	0	1	0	0		0	0	0
0	0	0	0	0	0	0	0	12
1	0	0	0	0	0	0	0	0
0	0	0	0	0	0	0	0	0
1	0	1	0	0	0	0	0	0
1	1	1	0	0	0	0	0	0
1	1	1	0	0	0	0	0	0
1	0	1	0	24	0	0	0	0
0	0	0	0	0	0	0	0	0
0			0	0		0		0
0	0	1	0	0	0	0	0	0
0	0	0	0	0		0	0	0
0	1	0	0	0		0	0	0
1	1	1	0	0	0	0	0	0
1	0	0	0	0	0	0	0	0
1	1	1	0	0		0	0	0
1	1		0	0	0	0		0
1	2	2	72	36	0	36	0	0
1			0	0		0		0
1	2	1	0	0	0	0	12	0
1	2		0	24	24	12		12
0	0	0	0	0	0	0	0	0
1	0	1		36	0	0	132	324
0	0		0	0	0	0		0
2	3	3	264	312	84	180	384	194
1			0	0	0	0		0
0	1	0	0	12		24	12	0
1	1		0	0	0	0		0
0	1	0		0	0	0	0	0
0	0	0		0	0	0	0	0
1	0	0		0	0	0	0	0
1	1	1	264	300	0	0	0	0
0	0	1	0	0	0	0	0	0
1	0	1	0	0	0	0		0
1	0	0	0	0	0	0	0	0
0	0	0	0	0	0	0	0	0
	1	0		0	0	0	0	0
	1	1		0	0	0	0	0
	0	1		0	0	0	0	0
	0	0		0	0	0	0	0
	1	1		0	0	0	0	0
0			0	0		0		0
0	0	0	0	0	0	0	0	0
0	0	0	0	0	0	0	0	0
1	1	1	0	0	0	0	0	0
0	0	0	0	0	0	0	0	0
1	1	0	0	0	0	0	0	0
1	1		0	0	0	0		0
1	0	0	0	0	0	0	0	0
1		1	0	0		0	0	0
1			0	0		0	0	0
1		0	0	0		0	0	0
1	1	0	0	0	0	0	0	0
1	1	1	0	0	0	0	0	0
1	1	0	0	0	0	0	0	0
1		1	0	0		0	0	0
1	0	1	0	0	0	0	0	0
1	0	0	0	0	0	0	0	0
2	3	3		0	384	372	216	168
1	1	1	0	0	0	0	0	0
1		0	0	0		0	0	0
0	0	0	0	0	0	0	0	0
0	0	0	0	0	0	0	0	0
1			0	0		0		0
0	0		0	0	0	0		0
3	2		612	660	576	912		348
1	0		0	0	0	0		0
1	0		0	0	0	0		0
0		0	0	0		0	0	0
1		1	0	0		0	0	0
1	0	0		0	0	0	0	0
0			0	0		0		0
1	1	2	0	12	48	24	12	24
1		1	0	0		0		0
0			0	0		0		0
1		0	0	0		0	0	0
		0				0	0	0
	0	0			0	0	0	0
	0			0	0	0
1		0	0	0		12	12	24
1	1	1	0	0		0	0	0
0	0	0	0	0	0	0	0	0
0	0	0	0	0	0	0	0	0
0		0	0	0		0	0	0
0		0	0	0		0	0	0
0		0	0	0		0	0	0
0	0	0	0	0	0	0	0	0
1	1	1	0	0	0	0	0	0
1	0	0	0	0	0	0		0
1			0	0		0		0
1		0	0	0		0	0	0
0		0	0	0		0	0	0
0		1		0		0	0	0
0		0	0	0		0	0	0
0		0	0	0		0	0	0
0		0	0	0		0	0	0
0	0	0	0	0	0	0	0	0
0		0	0	0		0	0	0
0	0	0	0	0	0	0	0	0
0	0	0	0	0	0	0		0
0	0	0	0	0	0	0		0
1	1	1	0	0	0	0	0	0
1	1	0	0	0	0	0	0	0
0	0	0	0	0	0	0	0	0
0	1	1	0	0	0	0	0	0
0	0	1	0	0	0	0	0	0
0	0	0	0	0	0	0	0	0
2	3	3	300	240	408	204	60	72
1	0	0	0	0	0	0	0	0
0		0	0	0		0	0	0
0		0	0	0		0	0	0
0	0	0	0	0	0	0	0	0
0	0	0	0	0	0	0	0	0
1	3	2	0	0	0	0	0	0
0	0	0	0	0	0	0	0	0
0	0	0	0	0	0	0	0	0
	0	1			0	0		0
0	0	0	0	0	0	0	0	0
0	0	0	0	12	0	0	0	0
0	1	0	0	0	0	0	0	0
0	0	0	0	0	0	0	0	0
1	0	0	0	0		0	0	0
0	0	0	0	0	0	0	0	0
1	0	0	0	0	0	0	0	0
0	3	0	0	0	0	0	0	0
0	0	0	0	0	0	0	0	0
0	0	0	0	0	0	0	0	0
0	0	0	0	0	0	0	0	0
2	3	3	36	12	48	36	0	36
0	0	0	0	0	0	0	0	0
1	0	0	0	0	0	0	0	0
0	0	0	0	0	0	0	0	0
1	1	0	0	0	0	0	0	0
1	1	0	0	0	0	0	0	0
1	1	1	0	0	0	0	12	0
1	0	0	0	0	0	0	0	0
1	0	1	0	0	0	0	0	0
0	0	0	0	0	0	0	0	0
1	0	0	0	0	0	0	0	0
0	1	1	0	0	0	0	0	0
1	0	0	0	0	0	0	0	0
0	0	0	0	0	0	0	0	0
2	3	3	192	112.5	24	0	0	24
1	1	0	0	0	0	0	0	0
0	0	0	0	0	0	0	0	0
0	0	0	0	0	0	0	0	0
0	0	0	0	0	0	0	0	0
1	1	1	0	0	0	0	0	0
1	1	0	0	0	0	0	0	0
0	0	0	0	0		0	0	0
0	0	0	0	0	0	0	0	0
2	3	3	444	252	204	120	0	240
1	1		0	0	0	0		0
0	0	0		0	0	0	0	0
1	0	0	0	0	0	0	0	0
0	0	0	0	0	0	0	0	0
1	0	1	0	0	0	0	0	0
0	1	0	0	0	0	0	0	0
1	1	0	0	0	0	0	0	0
0	1	0	0	0	0	0	0	0
0	0	0	0	0	0	0	0	0
0	0	0	0	0	0	0	0	0
0	0	0	0	0	0	0	0	0
0	0	0	0	0	0	0	0	0
0	0	0	0	0	0	0	0	0
1	0	0	0	0	0	0	0	0
0	0	0	0	0	0	0	0	0
1	1	1	0	12	12	0	0	0
0	0	0	0	0	0	0	0	0
0	0	0		0	0	0	0	0
0	1	1	0	0	0	0	0	0
1	0	0	0	0	0	0	0	0
1	0	0	0	0	0	0	0	0
0	0	0	0	0	0	0	0	0
0	0	0	0	0	0	0	0	0
1		0	0	0		0	0	0
1	0	0	0	0	0	0	0	0
0	1	0	0	0	0	0	0	0
1		1	36	12		36	0	0
0	0	0	0	0	0	0	0	0
0	0	0	0	0	0	0	0	0
1	0	1	0	0		0	0	0
0	0	0	0	0	0	0	0	0
1	0	1	0	0	0	0	0	0
0	0	0	0	0	0	0	0	0
1	0	0	0	0	0	0	0	0
0	0	0	0	0	0	0	0	0
1	1	1	0	0	0	0	0	0
1	1	0	0	0	0	0	0	0
0	0	0	0	0	0	0	0	0
0	0	0	0	0	0	0		12
0	0	0	0	0	0	0	0	0
0	0	0	0	0	0	0	0	0
2		3	0	0		0	0	0
0	0	0	0	0	0	0	0	0
0	0	1	0	0	0	0	0	0
1	0	0	0	0	0	0	0	0
1	1	1	0	0	0	0	0	0
0	0	0		0	0	0	0	0
1	2	1	0	0	0	0	156	24
0	0	0	0	0	0	0	0	0
0	1	0	0	0	0	0	0	0
0	0	0	0	0	0	0	0	0
0	0	0	0	0	0	0	0	0
0	0	0	0	0	0	0	0	0
0		0	0	0		0	0	0
1	0	0	0	0	0	0	0	0
1	0	0	0	0	0	0	0	0
1	0	0	0	0	0	0	0	0
1	1	1	0	12	0	0	0	0
0	0	0	0	0	0	0	0	0
0	0	0	0	0	0	0	0	0
1	0		0	0	0	0		0
0	0	0		0	0	0	0	0
2	3	2	180	324	60	36	0	132
0	1	1	0	0	0	0	0	0
2	2	1	12	36	48	12	36	48
1	1	1	0	0	0	0	0	0
1	0	1	0	0	0	0	0	0
0	0	0	0	0	0	0	0	0
0	0	0	0	0	0	0	0	0
0	1	0	0	0	0	0	0	0
0	0	0	0	0	0	0	0	0
0	1	1	0	0	0	0	0	0
0	0		0	0	0	0		0
0	0	0	0	0	0	0	0	0
0	0	0	0	0	0	0	0	0
1	1	1	0	0	0	0	0	0
0	0	0	0	0	0	0	0	0
1	0	0	0	0	0	0	0	0
0	0	0	0	0	0	0		0
1	1	0	0	0		0	0	0
1		1	0	0		0	0	0
1	0	1	0	0	0	0	0	0
1	0	0		0	0	0	0	0
1	0	0	0	0	0	0	0	0
1	0	0	0	0	0	0	0	0
1	0	0	0	0	0	0	0	0
1	1	1	0	0	0	0	0	0
2	1	1	192	120	84	84
1	1	0	0	0	0	0	0	0
0	0	0	0	0	0	0	0	0
1	0	0	0	0	0	0		0
1	1		0	0		0		0
1	0	0	0	0	0	0		0
1	0	0	0	0	0	0		0
0	0	0	0	0	0	0		0
0	0	0	0	0	0	0		0
1	1	1	0	0	0	0		0
1	0	0	0	0	0	0		0
1	1	1	180	108	0	60		12
1	1	1	0	0	0	0		0
0	0	0	0	0	0	0	0	0
0	0	0	0	0	0	0	0	0
0	0	0	0	0	0	0	0	0
1	1	1	0	0	0	0	0	0
0			0	24		24	0	0
0	0	0	0	0	0	0	0	0
0	0	0	0	12	0	0	0	0
2	1	2	144	300	228	156	192	420
0	0	0		0	0	0	0	0
1	1	1	0	0	0	0	0	0
0	0	0	0	0	0	0	0	0
1	1	0	0	0	0	0	0	0
0	0	0	0	0	0	0	0	0
0	0	0	0	0	0	0	0	0
0	0	0	0	0		0	0	0
0	1	1	0	0	0	0	0	36
0	1	1	156	132	12	72	0	120
0	0	0	0	0	0	0	0	0
0	0	0	0	0	0	0	0	0
0	0	0	0	0	0	0	0	0
1	0	1	0	0	0	0	0	0
1	0	0	0	0	0	0	0	0
0	0	0	0	0	0	0	0	0
1	0	0	0	0	0	0	0	0
0	0	0	0	0	0	0	0	0
1	1	1	0	0	0	0	0	12
0	0	0	0	0	0	0	0	0
0	1		0	0	0	0	0	0
0	0	0	0	0	0	0	0	0
1	0		0	0	0	0	0	0
	0	0		0	0	0	0	12
0		0				0	0	0
0		0			0	0	0	0
0		0			0	0	0	0
0		0			0	0	0	0
0	0	0	0	0	0	0	0	0
0	0	0	0	0		0	0	0
0	0	0	0	0	0	0	0	0
0	0	0	0	0	0	0	0	0
0	0	0	0	0	0	0	0	0
0	0	0	0	0	0	0	0	0
1	0	0	0	0	0	0	0	0
0	0	0	0	0	0	0	0	0
0	0	0	0	0	0	0	0	0
0			0	0		0		0
0			0	0		0		0
1	1		0	0	0	0		0
0			0	0		0		0
0	0	0	0	0	0	0	0	0
0	0	0	0	0	0	0	0	0
0	0	1	0	0	0	0	0	0
1	0	1	0	0	0	0	0	0
0	0		0	0	0	0	0	0
0		0	0	0		0	0	0
0	0	0	0	0	0	0	0	0
0	0		0	0	0	0	0	0
0	1	1	0	0	0	0	0	0
0		0	0	0		0	0	12
0	0	0	0	0	0	0	0
1	0	1	0	0	0	0	0	0
1	0	0	0	0	0	0	0	0
0			0	0		0		0
0	0		0	0	0	0		0
0		0			0	0	0
0	1	1	0	0	0	0	0	0
0	0	0	0	0	0	0	0	0
0	0	0	0	0	0	0	0	0
1	0	0	0	0	0	0	0	0
0			0	0	0	0
0	0	0		0	0	0	0	0
0	1	0	0	0	0	0	0	0
0	0	0		0	0	0		0
0	0	0	0	0	0	0	0	0
0	0	0	0	0	0	0	0	0
0	0	0	0	0	0	0	0	0
0	0	0	0	0	0	0	0	0
1	0	0	0	0	0	0	0	0
2	2	2	120	156	300	300	96	192
1	1	0	0	0	0	0	0	0
0	0	0	192	216	84	120		0
0	0	0	0	0	0	0	0	0
0	0	0	0	0	0	0	0	0
0	0	1	0	0	0	0	0	0
0	0	0	0	0	0	0	0	0
0			0	0	0	0
0	1	0	0	0	0	0	0	0
0	0	0	0	0	0	0	0	0
1	0		0	0	0	0
0	0	0	0	0	0	0	0	0
0	0	0	0	0	0	0	0	0
0			0	0	0	0
0	0	0	0	0	0	0		0
0			0	0	0	0
0	0		0	0	24	12
0	0		0	0	0	0
0	0	0	0	0	96	120	0	0
2	3	3	0	132	72	0	120	192
2	3		48	60	48	60
0	0	0	0	0	0	0	0	0
0	0	0		0	0	0	0	0
0	0	0	0	0	0	0	0	0
0	0		0	0		0
1	1	1	0	0	0	0	0	0
0	1	0	0	0	0	0	0
2	3	2	24	36	0	12	132	24
0	0	0	72	84	36	36	0	0
0	0	0	0	0		0	0	0
1	1	0	0	0	0	0	0	0
0	1	1		0	0	0	0	0
1	1	0	12	12	12	12	12	24
0	0	0	0	0	0	0	0	0
0	1	0	0	0	0	0	0	0
1	0	0	0	0	0	0	0	0
1	1	0	0	48	0	12	24	36
1	1	0	0	0	0	0	72	48
1	1	1	0	12	0	0	12	24
0	0	0	0	0	12	24	0	0
0	1	1	0	0	0	0	0	0
1	2	2	0	96	0	156	158	132
0		0	0	0	0	0	0	0
0	0	0	0	0	0	0	0	0
0	0	0	0	0		0	0	0
0	0	0	0	0	0	0	0	0
1	0	0	0	0	0	0	0	0
0	1	0			0	0	0	0
0	0	0			0	0	0	0
0		0			0	12	0	0
0	1	1			0	0	0	0
0	0	0			0	0	0	0
1	1	0			0	0	0	0
0	0	0			0	0	0	0
1		2			0	0	0	0
0	0	0			0	0	0	0
1	0	0			0	0	0	0
0	0	0			0	0	0	0
0	0	0			0	0	0	0
0	0	0			0	0	0	0
0	0				0	0	0	0
0		0			0	0	0	0
0	0	0			0	0	0	0
0	0		0	0	0	0
1	2	0	0	0	0	0	0	0
0	0	0	0	0	0	0	0	0
1	1	1	0	0	0	0	0	0
0	1	0	0	0	0	0	0	0
1	1	0	0	0	0	0	0	0
0			0	0	0	0	0	0
1	1	1	0	0	0	0	0	0
0	1	1	0	0	0	0	0	0
1	0	0	0	0	0	0	0	0
0	0	1	0	0	0	0		0
0	1		0	0	0	0
1	0		0	0	0	0
1	0		0	0	0	0	0	0
1	1	1	0	24	0	0	0	0
2	2	3	132	0	84	72	792	60
0	0	0	0	0	0	0	0	0
1	1	0	0	0	0	0	0	0
1	1	0	0	0	0	0	0	0
1	1	1	0	0	0	0	20	0
2	2	3		0	12	12	48	12
1	1				0	0	0	0
1	1	0			0	0	0	0
1					0	0
1						0
0	1	0			0	0	0	0
0	0	0			0	0	0	0
2	3	3		1140	1356	1104	540	1024
2	2	1			600	408	1440	1356

## Sheet: Uganda - 2010
CCA 1	CCA 2	Sm1A	Sm1B	Sm2A	Sm2B	Sm3A	Sm3B	School
5	5	0	0	0	0	0	0	Kibuye p/s
5	5	0	0	0	0	0	0	Kibuye p/s
5	5	0	0	0	0	1	0	Kibuye p/s
5	5	0	0	0	0	0	0	Kibuye p/s
4	5	0	0			1	0	Kibuye p/s
5	5	0	0	0	0	0	0	Kibuye p/s
3	2	0	4	2	0	0	0	Kibuye p/s
5	5	0	0	0	0	0	3	Kibuye p/s
5	5	0	0	0	0	0	0	Kibuye p/s
4	5	0	0	0	0	0	0	Kibuye p/s
1	5	0	0	0	1	0	1	Kibuye p/s
4	5	0	0	0	0	0	0	Kibuye p/s
5	5	0	0	0	0	0	0	Kibuye p/s
5	5	0	0	0	0	0	0	Kibuye p/s
2	1	1	1	5	2	0	1	Kibuye p/s
1	1	1	4	0	0	6	8	Kibuye p/s
2	5	0	0	5	5	0	2	Kibuye p/s
3	1	279	252	10		7	4	Kibuye p/s
5	5	0	0	0	0	0	0	Kibuye p/s
5	5	0	0	0	0	0	0	Kibuye p/s
5	5	1	0	0	0	0	0	Kibuye p/s
1	5	0	0	0	0	0	0	Kibuye p/s
4	5	0	0	0	0	0	2	Kibuye p/s
5	5	0	0	0	0	0	0	Kibuye p/s
5	5	0	0	0	0	0	0	Kibuye p/s
5	5	0	0	1	0	0	0	Kibuye p/s
4	5	0	1	0	0	0	0	Kibuye p/s
1	5	0	1	0	0	1	3	Kibuye p/s
1	5	0	0	2	0	0	0	Kibuye p/s
3	1	11	13	3	4	4	0	Kibuye p/s
5	5	0	2	0	0	0	0	Kibuye p/s
1	5	0	0	0	0	0	0	Kibuye p/s
1	4	1	0	0	0	1	0	Kibuye p/s
1	4	1	1	0	0	0	0	Kibuye p/s
4	5	0	0	0	0	0	0	Kibuye p/s
3	2	4	8	6	3	1	0	Kibuye p/s
1	4	0	0			5	0	Kibuye p/s
3	1	0	0	71	21	47	25	Kibuye p/s
5	5	0	0	0	0	0	0	Kibuye p/s
5	5	0	0	0	0	0	0	Kibuye p/s
1	4	0	0	0	0	0	0	Kibuye p/s
2	4	0	0	0	0	0	0	Kibuye p/s
5	5	0	0	0	0	0	0	Kibuye p/s
2	4	3	1	0	0	0	2	Kibuye p/s
4	5	0	0	1	0	2	1	Kibuye p/s
3	4	3	1	16	8	1	3	Kibuye p/s
1	4	0	0	0	0	0	0	Kibuye p/s
4	5	0	3	0	1	3	0	Kibuye p/s
1	4	0	0	0	0	0	0	Kibuye p/s
4	5	0	0	0	0	0	0	Kibuye p/s
4	5	0	1	0	0	0	0	Kibuye p/s
5	5	0	0	0	0	0	0	Kibuye p/s
5	5	0	0	0	0	0	0	Kibuye p/s
5	5	0	0			0	0	Kibuye p/s
5	5	0	0	0	0	0	0	Kibuye p/s
3	1	3	2	4	0	0	0	Kibuye p/s
1	5	0	0	0	0	0	0	Kibuye p/s
2	4	2	0	7	9	12	16	Kibuye p/s
3	1	3	2	5	8	0	0	Kibuye p/s
4	5	0	1	0	0	0	0	Kibuye p/s
3	2	190	254	30	36	467	514	Kibuye p/s
3	4	7	0	1	2	2	3	Kibuye p/s
2	4	0	0	0	0	0	0	Kibuye p/s
5	5	0	0	0	0	0	0	Kibuye p/s
4	5	0	0	0	0	1	0	Kibuye p/s
3	1	5	9	9	4	7	4	Kibuye p/s
2	1	0	0	0	0	0	0	Kibuye p/s
1	4	0	2	0	0			Kibuye p/s
3	1	3	3	2	8	8	5	Kibuye p/s
5	5	0	0	0	0	0	0	Kibuye p/s
2	4	0	9	0	1	0	1	Kibuye p/s
3	1	8	0	1	1	3	0	Kibuye p/s
4	4	0	0	0	0	0	0	Kibuye p/s
3	4	0	2	5	3	1	3	Kibuye p/s
4	5	0	0	1	0	0	0	Kibuye p/s
4	5	0	0	0	0	0	0	Kibuye p/s
4	5	0	0	0	0	0	0	Kibuye p/s
4	5	0	0	0	0	0	0	Kibuye p/s
5	5	0	0	0	0	0	3	Kibuye p/s
4	5	0	0	0	0	0	0	Kibuye p/s
1	4	0	0	1	0	0	0	Kibuye p/s
4	5	0	0	0	0	0	0	Kibuye p/s
5	5	0	0	0	0	0	0	Kibuye p/s
4	5	0	0	0	0	0	1	Kibuye p/s
1	4	5	0	5	3	0	6	Kibuye p/s
3	4	3	5	5	6	17	8	Kibuye p/s
5	5	0	0	0	0	0	0	Kibuye p/s
4	5	0	0	0	0	0	0	Kibuye p/s
1	4	0	0	1	1	9	7	Kibuye p/s
3	1	10	11	6	3	0	2	Kibuye p/s
3	1	11	11	8	8	14	12	Kibuye p/s
4	5	2	1	0	0	0	1	Kibuye p/s
5	5	0	0	0	0	0	0	Kibuye p/s
3	1	0	0	12	9	11	17	Kibuye p/s
1	4	1	2	3	7	24	20	Kibuye p/s
4	5	0	0	1	0	0	0	Kibuye p/s
5	5	0	0	0	0	0	0	Kibuye p/s
4	5	0	0	0	0	0	0	Kibuye p/s
3	1	36	67	18	44	14	11	Kibuye p/s
2	4	14	6	20	30	20	30	Kibuye p/s
4	5	0	0	0	0	1	2	Kibimba p/s
5	5	0	0	0	0	0	0	Kibimba p/s
3	1	3	5	132	155	10	13	Kibimba p/s
4	5	0	0	0	0			Kibimba p/s
5	5	0	0					Kibimba p/s
5	5	0	0	0	0	0	0	Kibimba p/s
2	4	6	15					Kibimba p/s
2	4	0	0	7	6	7	5	Kibimba p/s
3	4	0	0	0	0	0	1	Kibimba p/s
3	1	24	25	1	3	41	38	Kibimba p/s
4	5	0	0	0	0	0	0	Kibimba p/s
4	5	0	0	0	0	0	0	Kibimba p/s
5	5	0	0	0	0	0	0	Kibimba p/s
5	5	0	0	0	0	0	0	Kibimba p/s
4	5	2	0	3	1	0	1	Kibimba p/s
1	5	1	2	1	3	1	1	Kibimba p/s
5	5	1	0	0	0	0	1	Kibimba p/s
3	4	4	0	0	4	5	3	Kibimba p/s
4	5	0	0	0	1	0	0	Kibimba p/s
4	5	1	0	0	0	0	1	Kibimba p/s
2	4	19	6	5	13	3	11	Kibimba p/s
4	5	1	1	4	1	0	0	Kibimba p/s
4	5	0	0	0	0	0	1	Kibimba p/s
5	5	0	0	0	0	0	0	Kibimba p/s
5	5	0	0	0	0	0	0	Kibimba p/s
5	5	0	0	0	0	0	0	Kibimba p/s
2	1	61	87	7	5	69	32	Kibimba p/s
1	5	1	4	6	1	0	1	Kibimba p/s
5	5	0	0	0	0	0	0	Kibimba p/s
4	5	0	0			1	0	Kibimba p/s
2	1	33	21	5	8	14	7	Kibimba p/s
1	4	4	0	0	0	0	0	Kibimba p/s
1	4	0	0	2	4	2	0	Kibimba p/s
2	1	10	12	3	4	0	0	Kibimba p/s
3	1	9	8	8	8	4	0	Kibimba p/s
3	1	3	10	3	3	28	19	Kibimba p/s
5	5	0	0	0	0			Kibimba p/s
4	5	0	0	0	0	0	0	Kibimba p/s
1	5	3	4	0	0	0	0	Kibimba p/s
4	5	0	0	0	0	0	0	Kibimba p/s
5	5	0	0	0	0	0	0	Kibimba p/s
5	5	0	0	0	0			Kibimba p/s
4	5	0	0	0	0	0	0	Kibimba p/s
1	4	1	0	0	0	1	1	Kibimba p/s
1	4	0	0	0	0	0	0	Kibimba p/s
3	1	3	0	0	0	0	6	Kibimba p/s
4	5	0	0	1	0	0	0	Kibimba p/s
4	5	0	0	0	0	0	0	Kibimba p/s
4	5	0	0	0	0	0	0	Kibimba p/s
4	5	0	1	0	0	0	0	Kibimba p/s
1	4	0	0	6	2	0	0	Kibimba p/s
1	4	0	0	0	0	0	0	Kibimba p/s
1	5	0	0	0	0	3	9	Kibimba p/s
1	4	0	2	4	1	2	0	Kibimba p/s
1	4	0	0	0	0	0	0	Kibimba p/s
4	4	0	0	0	0	0	0	Kibimba p/s
4	5	1	0	2	0			Kibimba p/s
4	5	0	0	0	0	0	0	Kibimba p/s
4	5	3	4	1	0	0	0	Kibimba p/s
3	1	40	0	20	49	15	6	Kibimba p/s
5	5	0	0	0	0	0	0	Kibimba p/s
4	5	0	0	0	0	1	0	Kibimba p/s
4	5	0	0	0	0	0	0	Kibimba p/s
4	5	0	0	0	0	0	0	Kibimba p/s
2	1	7	13	6	2	8	14	Kibimba p/s
1	4	2	4	2	11	0	0	Kibimba p/s
1	4	0	1	1	0	0	0	Kibimba p/s
4	5	2	0	0	0	0	0	Kibimba p/s
4	5	0	0	0	0	1	0	Kibimba p/s
4	5	0	0	0	0	0	1	Kibimba p/s
2	4	0	0	9	16	3	2	Kibimba p/s
4	5	0	0	0	0	0	0	Kibimba p/s
5	5	0	0	0	0	0	0	Kibimba p/s
5	5	0	0	0	0	0	0	Kibimba p/s
5	5	0	0	0	0	0	0	Kibimba p/s
5	5	0	0	0	0	0	0	Kibimba p/s
2	4	0	0	0	0	0	0	Kibimba p/s
2	4	0	0	0	4	0	1	Kibimba p/s
1	4	0	0	0	0	0	0	Kibimba p/s
5	5	0	0	0	0	0	0	Kibimba p/s
1	4	1	0	0	0	0	0	Kibimba p/s
4	5	0	0	0	0	0	0	Kibimba p/s
2	4	1	2	0	2	2	2	Kibimba p/s
5	5	0	0	0	0	0	0	Kibimba p/s
2	4	1	0	1	4	2	8	Kibimba p/s
2	1	14	14	2	4	27	24	Kibimba p/s
5	5	0	0	0	0	0	0	Kibimba p/s
1	4	0	0	2	0	0	0	Kibimba p/s
4	5	0	0	0	0			Kibimba p/s
5	5	0	0	0	0	0	0	Kibimba p/s
4	5	0	0	0	0	0	0	Kibimba p/s
1	1	10	8	6	2	3	4	Kibimba p/s
4	5	0	1	0	0	0	0	Kibimba p/s
5	5	0	0					Kibimba p/s
4	5	0	0	0	0	0	0	Kibimba p/s
4	5	0	0	0	0	0	0	Kibimba p/s
5	5	0	0	0	0	0	0	Kibimba p/s
5	5	0	0	6	5			Kibimba p/s
5	5	0	0	0	1	0	0	Kibimba p/s
2	1	5	3	2	10	4	3	Kibimba p/s
1	5	0	0	0	1	1	1	Bufunda p/s
4	5	0	0	0	0	0	0	Bufunda p/s
5	5	0	0	0	0	0	0	Bufunda p/s
2	4	2	0	1	1	0	0	Bufunda p/s
5	5	0	0	0	0	0	0	Bufunda p/s
1	4	1	0	1	0	3	0	Bufunda p/s
4	5	0	0	0	0	0	0	Bufunda p/s
5	5	0	0	0	0	0	0	Bufunda p/s
4	5	0	0	0	0	0	0	Bufunda p/s
3	1	8	11	1	2	2	2	Bufunda p/s
4	5	0	0	0	0	0	0	Bufunda p/s
5	5	0	0	0	0	0	0	Bufunda p/s
4	5	0	0	1	0	0	0	Bufunda p/s
4	5	0	0	0	0	0	0	Bufunda p/s
4	4	0	0	0	0	0	0	Bufunda p/s
1	4	0	2	1	0	1	0	Bufunda p/s
4	5	0	0	0	0	0	0	Bufunda p/s
4	5	0	0	0	0	0	0	Bufunda p/s
5	5	0		0	0	0	0	Bufunda p/s
4	5	4	0	0	0	0	0	Bufunda p/s
5	5	0	0	0	0	0	0	Bufunda p/s
4	5	0	0	0	0	0	0	Bufunda p/s
4	5	0	0	0	0	0	0	Bufunda p/s
1	4	0	0	0	0	0	0	Bufunda p/s
2	4	0	0	0	0	0	0	Bufunda p/s
5	5	0	0	0	0	0	0	Bufunda p/s
5	5	0	0	0	0			Bufunda p/s
3	2	0	0	0	0	0	3	Bufunda p/s
3	2	6	4	4	3	0	2	Bufunda p/s
2	4	0	0	0	2	0	1	Bufunda p/s
4	4	0	0	0	0	0	0	Bufunda p/s
2	1	0	0	0	0	0	1	Bufunda p/s
3	2	0	3	4	1	0	0	Bufunda p/s
5	5	0	0	0	0	0	0	Bufunda p/s
4	5	0	0	0	0	0	0	Bufunda p/s
3	1	1	1	1	1	16	14	Bufunda p/s
4	5	0	0	0	0	0	0	Bufunda p/s
4	5	0	0	0	0	0	0	Bufunda p/s
3	2	0	0	2	2	0	0	Bufunda p/s
4	5	0	0	0	0	0	0	Bufunda p/s
4	5	0	0	0	0	0	0	Bufunda p/s
1	4	1	0	0	0	0	0	Bufunda p/s
4	5	0	0	0	0	0	0	Bufunda p/s
4	5	0	0	0	0	0	0	Bufunda p/s
1	4	0	0	0	0	0	0	Bufunda p/s
5	5	0	0	0	0	0	1	Bufunda p/s
4	5	0	0	0	0	0	0	Bufunda p/s
5	5	0	0	0	0	0	0	Bufunda p/s
3	2	0	4	0	0	0	1	Bufunda p/s
4	5	0	0	0	0	0	0	Bufunda p/s
5	5	0	0	0	0	0	0	Bufunda p/s
5	5	0	0	0	0	0	0	Bufunda p/s
4	5	0	0	0	0	0	0	Bufunda p/s
2	4	0	0	0	0	0	0	Bufunda p/s
4	5	0	0	0	0	0	0	Bufunda p/s
2	4	0	0	0	1	0	0	Bufunda p/s
3	4	2	0	0	0	2	0	Bufunda p/s
5	5	0	0	0	0	0	0	Bufunda p/s
3	1	1	1	0	0	0	1	Bufunda p/s
1	5	1	2	0	2	1	3	Bufunda p/s
4	5	0	0	0	0	0	0	Bufunda p/s
1	5	0	0	1	4	0	0	Bufunda p/s
5	5	0	0	0	0	0	0	Bufunda p/s
3	1	0	1	4	1	1	2	Bufunda p/s
3	1	1	0	1	0	3	1	Bufunda p/s
1	4	0	0	0	0	0	0	Bufunda p/s
4	5	1	0	0	0	0	0	Bufunda p/s
5	5	0	0	0	0	0	0	Bufunda p/s
5	5	0	0	0	0	0	0	Bufunda p/s
4	5	0	0	0	0	0	0	Bufunda p/s
4	5	1	2	0	0	0	0	Bufunda p/s
5	5	0	0	0	0	0	0	Bufunda p/s
5	5	0	0	0	0	0	0	Bufunda p/s
5	5	0	0	0	0	0	0	Bufunda p/s
3	1	17	15	8	7	0	3	Bufunda p/s
5	5	0	0	0	0	0	0	Bufunda p/s
1	4	0	0	4	3	1	4	Bufunda p/s
5	5	0	0	0	0	0	0	Bufunda p/s
5	5	0	0	0	0	0	0	Bufunda p/s
5	5	0	0	0	0	0	0	Bufunda p/s
4	5	0	0	0	0	0	0	Bufunda p/s
5	5	0	0	0	0	0	0	Bufunda p/s
5	5	0	0	0	0	0	0	Bufunda p/s
5	5	0	0	0	0	0	0	Bufunda p/s
4	5	0	0	0	0	0	0	Bufunda p/s
5	5	0	0	0	0	0	0	Bufunda p/s
5	5	0	0	0	0	0	0	Bufunda p/s
5	5	0	0	0	0	0	0	Bufunda p/s
5	5	0	0	0	0	0	0	Bufunda p/s
5	5	0	0	0	0	0	0	Bufunda p/s
3	1	6	4	17	13	0	0	Bufunda p/s
1	4	1	2	3	3	0	0	Bufunda p/s
5	5	0	0	0	0	0	0	Bufunda p/s
1	4	4	3	1	0	0	0	Bufunda p/s
5	5	0	0	0	0	0	0	Bufunda p/s
1	5	0		0	0	0	0	Bufunda p/s
4	5	0	0	0	0	0	0	Bufunda p/s
4	5	0	0	0	0	0	0	Bufunda p/s
2	4	0	0	0	0	0	0	Bufunda p/s
5	5	0	0	0	0	0	0	Bufunda p/s
5	5	0	0	0	0	0	0	Bubuzi p/s
4	5	0	0	0	0	0	0	Bubuzi p/s
2	1	35	17	2	1			Bubuzi p/s
5	5	0	0	0	0	0	0	Bubuzi p/s
3	2	1	3			35	25	Bubuzi p/s
5	5	0	0	0	0	0	0	Bubuzi p/s
5	5	0	0	0	0			Bubuzi p/s
5	5	0	0			0	0	Bubuzi p/s
5	5	0	0	0	0	0	0	Bubuzi p/s
5	5	1	0	0	0	0	0	Bubuzi p/s
5	5	0	0	0	0	0	0	Bubuzi p/s
5	5	0	0	0	0	0	0	Bubuzi p/s
5	5	0	0	0	0	0	0	Bubuzi p/s
5	5	1	0	0	2	0	0	Bubuzi p/s
4	5	0	0	0	0			Bubuzi p/s
5	5	0	0	0	0	0	0	Bubuzi p/s
5	5	0	0	0	0	0	0	Bubuzi p/s
2	4	5	0	1	0	2	7	Bubuzi p/s
5	5	0	0	0	0	0	0	Bubuzi p/s
5	5	6	8	28	14	77	74	Bubuzi p/s
3	1	96	92	22	17	9	6	Bubuzi p/s
5	5	0	0	0	0	0	0	Bubuzi p/s
5	5	0	0	0	0	0	0	Bubuzi p/s
5	5	0	0	0	0	0	0	Bubuzi p/s
4	5	0	0	0	0	0	0	Bubuzi p/s
5	5	0	0	0	0	0	0	Bubuzi p/s
5	5	0	0	0	0	0	0	Bubuzi p/s
5	5	0	0	0	0	0	0	Bubuzi p/s
5	5	0	0	0	0	0	0	Bubuzi p/s
5	5	0	0	0	1	0	0	Bubuzi p/s
4	5	0	0	0	0	0	0	Bubuzi p/s
1	5	0	0	0	0	0	0	Bubuzi p/s
5	5	0	2	0	0	0	0	Bubuzi p/s
5	5	0	0	0	0	0	0	Bubuzi p/s
4	5	0	0	0	0	0	0	Bubuzi p/s
4	5	0	0	0	0	0	0	Bubuzi p/s
4	5	0	0	0	0	0	0	Bubuzi p/s
5	5	0	0	0	0	0	0	Bubuzi p/s
4	5	0	0	0	1	0	0	Bubuzi p/s
3	2	54	77	22	18	99	103	Bubuzi p/s
5	5	0	0	0	0			Bubuzi p/s
2	4	3	3	0	1	3	6	Bubuzi p/s
4	5	0	0	0	0	0	0	Bubuzi p/s
3	1	23	18	16	13	12	6	Bubuzi p/s
5	5	0	0	1	0	0	0	Bubuzi p/s
5	5	0	0	0	0	0	0	Bubuzi p/s
4	5	0	0	0	0	0	0	Bubuzi p/s
4	5	0	0	0	0	0	0	Bubuzi p/s
4	5	0	0	0	0	0	0	Bubuzi p/s
4	5	7	29	0	0	0	0	Bubuzi p/s
3	1	0	0	16	35	25	6	Bubuzi p/s
5	5	0	0	0	1	0	0	Bubuzi p/s
1	4	0	0			62	40	Bubuzi p/s
1	5	0	2	0	3	14	2	Bubuzi p/s
4	5	0	0	0	0	0	0	Bubuzi p/s
5	5	0	0	0	0	0	0	Bubuzi p/s
4	5	0	0	0	0	0	0	Bubuzi p/s
3	5	0	0	1	3	2	1	Bubuzi p/s
1	4	0	0	2	2	0	0	Bubuzi p/s
1	5	0	0	0	0	0	0	Bubuzi p/s
5	5	0	0	0	0	0	0	Bubuzi p/s
4	5	0	0	0	0	0	0	Bubuzi p/s
5	5	0	0	0	0	0	0	Bubuzi p/s
4	5	0	0	0	0			Bubuzi p/s
3	4	4	18	14	22	12	18	Bubuzi p/s
5	5	0	0	0	0	0	0	Bubuzi p/s
3	1	37	61					Bubuzi p/s
5	5	0	0	0	0	0	0	Bubuzi p/s
4	5	0	0	0	0	0	0	Bubuzi p/s
5	5	0	0	0	0	0	0	Bubuzi p/s
5	5	0	0	0	0	0	0	Bubuzi p/s
4	5	0	0	0	0	0	0	Bubuzi p/s
4	5	0	0	0	0	0	0	Bubuzi p/s
4	5	0	0	0	0	0	0	Bubuzi p/s
4	5	0	0	0	0	0	0	Bubuzi p/s
3	1	0	0	0	0	0	0	Bubuzi p/s
5	5	0	0	0	0	0	0	Bubuzi p/s
4	5	0	1	0	0	0	0	Bubuzi p/s
5	5	0	0	0	0	0	0	Bubuzi p/s
4	5	0	0	0	0	0	0	Bubuzi p/s
5	5	5	14	3	5	8	4	Bubuzi p/s
5	5	16	18	18	10	17	13	Bubuzi p/s
1	4	0	0			0	0	Bubuzi p/s
1	4	0	0	0	0	0	0	Bubuzi p/s
4	5	0	0	0	0			Bubuzi p/s
4	5	0	0	0	0	0	0	Bubuzi p/s
1	5	0	0	0	1	0	0	Bubuzi p/s
3	1	0	0	0	0			Bubuzi p/s
3	1	1	0	0	0	0	0	Bubuzi p/s
3	1	0	0	3	1	2	1	Bubuzi p/s
5	5	0	0	0	0	0	0	Bubuzi p/s
1	5	2	0	3	5	1	1	Bubuzi p/s
1	5	0	0	0	0	0	0	Bubuzi p/s
2	1	0	0	1	0	0	0	Bubuzi p/s
3	2	32	55	17	19	0	0	Bubuzi p/s
5	5	0	0	0	0	0	0	Bubuzi p/s
3	1	2	1	4	13	8	12	Bubuzi p/s
3	1	2	3	1	1	2	2	Bubuzi p/s
5	5	0	0	0	0	0	0	Bubuzi p/s
3	1	2	11	0	1	6	1	Bubuzi p/s
1	5	0	0	0	0	0	0	Nangalama p/s
5	5	0	0	0	0	0	0	Nangalama p/s
5	5	0	0	0	0	0	0	Nangalama p/s
5	5	0	0	0	0	0	0	Nangalama p/s
5	5	0	0	0	0	0	0	Nangalama p/s
1	5	0	0	0	0	0	0	Nangalama p/s
1	4	0	0	0	0	0	0	Nangalama p/s
4	5	0	0	0	0	0	0	Nangalama p/s
1	5	0	0	0	0	0	0	Nangalama p/s
5	5	0	0	0	0	0	0	Nangalama p/s
4	5	0	0	0	0	0	0	Nangalama p/s
1	5	0	0	0	0	0	0	Nangalama p/s
4	5	0	0	0	0	0	0	Nangalama p/s
4	5	0	0	0	0	0	0	Nangalama p/s
5	5	0	0	0	0	0	0	Nangalama p/s
1	5	0	0	0	0	0	0	Nangalama p/s
5	5	0	0	0	0	0	0	Nangalama p/s
4	5	0	0	0	0	0	0	Nangalama p/s
4	5	0	0	0	0	0	0	Nangalama p/s
1	5	0	0	0	0	0	0	Nangalama p/s
4	5	0	0	0	0	0	0	Nangalama p/s
4	5	0	0	0	1	0	0	Nangalama p/s
5	5	0	0	0	0	0	0	Nangalama p/s
1	4	0	0	0	0	0	0	Nangalama p/s
3	4	9	4	7	0	1	1	Nangalama p/s
5	5	0	0	0	0	0	0	Nangalama p/s
1	5	0	0	0	0	0	0	Nangalama p/s
1	5	0	0	0	0	0	0	Nangalama p/s
5	5	0	0	0	0	0	0	Nangalama p/s
5	5	0	0	0	0	0	0	Nangalama p/s
4	5	0	0	0	0	0	0	Nangalama p/s
3	2	6	13	13	5	1	2	Nangalama p/s
1	5	0	0	0	0	0	0	Nangalama p/s
4	5	0	0	0	0	0	0	Nangalama p/s
4	5	0	0	0	0	0	0	Nangalama p/s
5	5	0	0	0	0			Nangalama p/s
1	5	0	0	0	0	0	0	Nangalama p/s
4	5	0	0	0	0	0	0	Nangalama p/s
4	5	0	0	0	0	0	0	Nangalama p/s
4	5	0	0	0	0	0	0	Nangalama p/s
5	5	0	0	0	0	0	0	Nangalama p/s
4	5	0	0	0	0	0	0	Nangalama p/s
4	5	0	0	0	0	0	0	Nangalama p/s
4	5	0	0	0	0	0	0	Nangalama p/s
5	5	0	0	0	0	0	0	Nangalama p/s
3	1	2	0	0	0	10	10	Nangalama p/s
4	5	0	0	0	0	0	0	Nangalama p/s
4	5	0	0	0	0	0	0	Nangalama p/s
5	5	0	0	0	0	0	0	Nangalama p/s
4	5	0	0	0	0	0	0	Nangalama p/s
5	5	0	0	0	0	0	0	Nangalama p/s
5	5	0	0	0	0	0	0	Nangalama p/s
5	5	0	0	0	0	0	0	Nangalama p/s
2	4	0	0	0	0	0	0	Nangalama p/s
5	5	1	2	0	0	1	1	Nangalama p/s
4	5	0	0	0	0	0	1	Nangalama p/s
5	5	0	0	0	0	0	0	Nangalama p/s
4	5	0	1	0	0	0	0	Nangalama p/s
5	5	0	0	0	0	0	0	Nangalama p/s
5	5	3	5	0	0	1	0	Nangalama p/s
3	1	2	5	6	5	4	2	Nangalama p/s
4	5	0	0	0	0	0	0	Nangalama p/s
5	5	0	0	0	0	0	0	Nangalama p/s
1	5	0	0	0	0	0	0	Nangalama p/s
5	5	0	0	0	0	0	0	Nangalama p/s
4	5	0	0	0	0	0	0	Nangalama p/s
5	5	0	0	0	0	0	0	Nangalama p/s
5	5	0	0	0	0	0	0	Nangalama p/s
5	5	0	0	0	0	0	0	Nangalama p/s
5	5	0	0	0	0	0	0	Nangalama p/s
5	5	0	0	0	0	0	0	Nangalama p/s
5	5	0	0	0	0			Nangalama p/s
5	5	0	0	0	0			Nangalama p/s
5	5	0	0	0	0	0	0	Nangalama p/s
5	5	0	0	0	0	0	0	Nangalama p/s
5	5	0	0	0	0	0	0	Nangalama p/s
5	5	0	0	0	0	0	0	Nangalama p/s
5	5	0	0	0	0	0	0	Nangalama p/s
5	5	0	0	0	0	0	0	Nangalama p/s
3	2	1	5	9	16	4	4	Nangalama p/s
5	5	0	0	0	0	0	0	Nangalama p/s
4	5	0	0	0	0			Nangalama p/s
5	5	0	0	0	0	0	0	Nangalama p/s
5	5	0	0	0	0	0	0	Nangalama p/s
5	5	0	0	0	0	0	0	Nangalama p/s
5	5	0	0	0	0	0	0	Nangalama p/s
5	5	0	0	0	0	0	0	Nangalama p/s
5	5	0	0	0	0	0	0	Nangalama p/s
5	5	0	0	0	0	0	0	Nangalama p/s
5	5	0	0	3	0	0	1	Nangalama p/s
2	1	0	0	0	0	0	0	Nangalama p/s
5	5	0	0	0	0	0	0	Nangalama p/s
4	5	0	0	0	3	2	0	Nangalama p/s
4	5	0	0	0	0	0	0	Nangalama p/s
5	5	0	0	0	0	0	0	Nangalama p/s
5	5	0	0	0	0	0	0	Nangalama p/s
5	5	0	0	0	0	0	0	Nangalama p/s
4	5	0	0	0	0	0	0	Nangalama p/s
5	5	0	0	0	0	0	0	Nangalama p/s
5	5	0	0	0	0	0	0	Nangalama p/s

## Sheet: Cameroon - Makenene
J1CCA1	J2CCA1	J3CCA1	J1KK1	J1KK2	J1KK3	J2KK1	J2KK2	J2KK3	J3KK1	J3KK2	J3KK3
+	+	+	0	0	0	1632	2304	3120	3456	3168	3288
+	+	+	552	168	312	456	672	240	1824	2304	2832
+	+	+	360	192	192	696	600	504	1248	1008	1656
+	+	+	792	168	528	672	1272	1248	792	480	1152
+	+	+	528	360	288	672	624	264	504	216	816
+	+	+	48	24	0	144	96	192	720	720	720
+	+	+	792	576	504	960	768	624	960	744	696
+	+	+	1032	528	1752	3120	3360	3240	1008	672	696
+	+	+	216	24	0	96	192	48	360	312	576
T	+	+	0	24	120	1296	744	1224	744	696	552
+	+	+	648	1152	528	96	168	120	264	432	552
+	+	+	0	0	24	192	336	168	984	936	528
+	+	+	72	24	120	240	72	264	240	648	504
+	+	+	48	48	120	168	72	72	264	384	504
-	T	+	0	0	0	0	0	0	72	144	480
+	+	+	816	504	1272	192	336	264	816	696	432
+	+	+	384	408	600	816	1104	960	288	312	432
+	+	+	0	0	0	0	0	0	288	96	432
+	+	+	48	120	0	192	168	72	744	696	408
+	+	+	216	240	48	600	840	384	672	192	408
+	+	+	192	432	216	120	120	144	936	48	408
+	+	+	1056	1416	984	96	240	336	456	456	384
+	+	+	0	0	0	24	0	72	144	336	384
+	+	+	96	0	48	1080	1248	936	216	360	336
+	+	+	48	48	48	96	72	96	408	216	336
+	+	+	1080	1008	816	96	264	384	216	168	336
+	+	+	24	120	168	24	96	24	144	264	312
+	+	+	0	0	0	96	24	120	312	240	288
+	+	+	480	312	480	192	24	72	192	240	288
+	+	+	48	96	96	600	480	984	384	624	264
+	+	+	336	240	408	312	360	480	312	552	264
+	+	+	504	336	360	96	72	24	168	144	264
+	+	+	240	96	168	384	384	144	216	120	264
-	+	+	888	2328	2328	4200	4152	3720	456	600	240
+	+	+	0	0	0	24	24	96	72	192	240
+	+	+	24	0	24	0	0	0	168	504	192
+	+	+	120	96	72	96	168	72	24	24	192
+	+	+	960	336	336	960	984	576	192	432	168
+	+	+	264	96	120	696	384	360	240	384	168
+	+	+	120	0	192	48	192	264	504	288	144
+	+	+	168	192	144	1728	960	1968	72	144	144
+	+	+	120	0	48	72	528	144	144	96	144
+	+	+	696	240	96	48	48	72	216	144	120
+	+	+	384	192	240	216	312	144	96	72	120
+	+	T	48	24	216	0	24	24	0	48	120
+	+	+	0	0	0	0	0	0	0	0	120
+	+	+	48	0	72	1032	1656	1248	48	144	96
+	+	+	336	624	384	120	288	96	48	96	96
+	+	+	0	72	48	48	144	144	120	48	96
+	+	+	144	0	0	0	24	48	192	24	96
+	+	+	0	0	0	48	96	48	72	24	96
+	+	+	144	0	192	240	192	336	192	0	96
+	+	+	240	72	336	264	384	480	72	0	96
+	+	+	672	576	600	72	120	96	24	0	96
+	+	+	0	0	0	168	72	96	120	360	72
+	+	+	360	480	336	336	336	840	168	216	72
+	+	+	0	0	0	72	264	144	144	192	72
+	+	+	72	72	24	600	696	312	144	168	72
+	+	+	720	1104	672	0	144	192	120	96	72
+	+	+	0	0	0	0	192	0	24	96	72
-	-	-	0	0	0	0	0	0	744	48	72
+	+	+	0	0	0	0	0	0	96	48	72
+	+	+	24	0	48	96	192	120	72	48	72
+	+	+	312	240	96	360	528	480	192	0	72
+	+	+	168	216	120	144	144	360	72	0	72
+	+	+	48	48	48	48	48	48	0	0	72
+	+	+	120	192	192	432	432	120	168	144	48
+	+	+	432	24	72	240	0	312	72	96	48
T	+	+	72	0	48	120	48	72	192	48	48
+	+	+	0	0	0	96	240	264	144	48	48
+	+	+	24	168	72	192	288	216	48	48	48
+	+	+	216	144	48	264	144	144	24	48	48
+	+	+	552	360	288	360	528	192	0	48	48
+	+	+	72	72	48	96	144	96	0	48	48
+	+	+	24	0	0	48	72	96	192	24	48
+	+	+	24	0	0	24	24	24	96	24	48
T	T	-	0	0	0	0	0	0	0	24	48
T	T	T	0	0	0	0	24	96	48	0	48
+	+	+	0	0	0	24	0	72	24	0	48
T	+	+	0	0	0	0	0	0	24	0	48
-	T	T	0	0	0	0	0	0	0	0	48
-	-	-	0	0	0	0	0	0	0	0	48
-	-	-	0	0	0	0	0	0	0	0	48
+	+	+	192	0	120	48	96	96	24	264	24
+	+	+	72	192	72	192	216	144	408	96	24
+	+	+	0	0	0	48	72	24	96	72	24
+	+	+	336	168	672	720	1152	864	168	48	24
+	+	+	24	24	120	24	24	240	72	48	24
+	+	+	120	192	24	96	96	192	72	48	24
+	+	+	72	0	24	48	24	48	24	48	24
+	+	+	24	96	72	0	0	0	72	24	24
+	T	+	0	48	0	0	0	0	24	24	24
-	-	+	0	0	0	0	0	0	24	24	24
+	+	T	96	48	72	24	24	0	48	0	24
+	+	+	0	24	72	72	0	0	24	0	24
+	+	+	0	48	0	48	144	72	0	0	24
+	+	+	48	0	0	48	120	48	0	0	24
+	+	+	0	0	24	24	96	48	0	0	24
+	+	+	48	48	0	144	48	48	0	0	24
+	T	+	0	0	0	72	48	24	0	0	24
+	+	+	48	24	24	0	24	0	0	0	24
-	-	-	0	0	0	0	24	0	0	0	24
-	-	T	0	0	0	0	0	0	0	0	24
-	+	-	0	0	0	0	0	0	0	0	24
+	+	-	0	0	0	0	0	0	0	0	24
+	+	+	264	336	384	24	72	0	144	120	0
+	+	+	240	168	144	48	24	0	48	96	0
+	+	+	168	120	168	0	0	0	0	72	0
-	+	+	0	0	0	0	24	0	72	48	0
+	+	+	48	0	0	48	48	48	48	48	0
+	+	-	72	48	96	144	48	72	0	48	0
+	+	+	120	0	24	0	24	0	0	48	0
+	+	+	0	0	48	0	0	0	0	48	0
+	-	+	120	0	120	48	48	120	48	24	0
+	+	+	0	0	0	576	360	312	24	24	0
+	+	+	48	0	0	0	0	0	24	24	0
+	T	+	0	0	0	0	24	0	0	24	0
-	T	T	0	0	0	0	0	0	0	24	0
+	+	+	0	0	0	0	0	0	0	24	0
T	+	+	0	0	0	0	0	0	0	24	0
-	-	-	0	0	0	0	0	0	48	0	0
+	+	+	72	48	48	96	120	192	24	0	0
+	+	+	0	0	0	144	360	168	24	0	0
+	+	+	312	672	432	72	120	168	24	0	0
+	+	+	72	24	120	120	48	168	24	0	0
T	+	T	0	0	0	0	24	0	24	0	0
-	+	+	0	24	0	0	0	0	24	0	0
T	T	-	0	0	0	0	0	0	24	0	0
T	T	T	0	0	0	0	0	0	24	0	0
T	-	-	0	0	0	0	0	0	24	0	0
-	-	T	0	0	0	0	0	0	24	0	0
+	+	T	744	408	768	1680	1608	1656	0	0	0
+	+	+	120	96	24	168	72	120	0	0	0
+	+	+	0	0	0	24	24	120	0	0	0
+	+	+	24	0	0	24	72	96	0	0	0
+	+	+	96	72	24	384	144	72	0	0	0
+	+	+	216	168	48	72	48	72	0	0	0
T	T	T	0	0	0	24	48	72	0	0	0
+	+	+	0	0	0	48	72	48	0	0	0
-	-	-	0	0	0	0	24	48	0	0	0
+	+	+	24	24	48	0	0	48	0	0	0
+	T	+	24	24	24	0	0	48	0	0	0
+	+	+	0	0	0	48	24	24	0	0	0
+	+	+	24	24	48	0	24	24	0	0	0
-	-	-	24	0	0	0	24	24	0	0	0
+	+	+	0	0	0	0	24	24	0	0	0
-	+	T	72	24	24	48	0	24	0	0	0
T	T	T	0	0	24	0	0	24	0	0	0
-	-	-	0	24	0	0	0	24	0	0	0
T	T	+	0	0	0	0	0	24	0	0	0
-	-	-	0	0	0	0	0	24	0	0	0
-	T	-	0	0	0	0	792	0	0	0	0
-	-	-	0	0	0	0	24	0	0	0	0
T	T	T	0	0	0	0	24	0	0	0	0
+	+	+	0	0	0	168	0	0	0	0	0
-	-	-	0	0	0	48	0	0	0	0	0
-	+	T	0	0	0	24	0	0	0	0	0
T	T	T	0	0	0	24	0	0	0	0	0
+	+	+	24	96	72	0	0	0	0	0	0
T	+	T	48	48	72	0	0	0	0	0	0
+	+	+	0	0	48	0	0	0	0	0	0
-	-	-	0	96	24	0	0	0	0	0	0
T	+	+	96	48	24	0	0	0	0	0	0
T	T	T	48	48	24	0	0	0	0	0	0
+	+	+	0	24	24	0	0	0	0	0	0
-	T	-	0	24	24	0	0	0	0	0	0
+	-	T	0	0	24	0	0	0	0	0	0
-	-	-	0	0	24	0	0	0	0	0	0
-	T	+	0	0	24	0	0	0	0	0	0
+	+	+	0	72	0	0	0	0	0	0	0
-	-	-	0	48	0	0	0	0	0	0	0
-	-	-	48	24	0	0	0	0	0	0	0
+	T	+	96	0	0	0	0	0	0	0	0
T	+	T	48	0	0	0	0	0	0	0	0
-	-	-	24	0	0	0	0	0	0	0	0
T	+	+	24	0	0	0	0	0	0	0	0
T	T	T	0	0	0	0	0	0	0	0	0
-	-	T	0	0	0	0	0	0	0	0	0
-	-	-	0	0	0	0	0	0	0	0	0
-	-	T	0	0	0	0	0	0	0	0	0
-	T	T	0	0	0	0	0	0	0	0	0
-	T	-	0	0	0	0	0	0	0	0	0
-	-	-	0	0	0	0	0	0	0	0	0
-	-	-	0	0	0	0	0	0	0	0	0
T	-	T	0	0	0	0	0	0	0	0	0
T	-	T	0	0	0	0	0	0	0	0	0
-	-	-	0	0	0	0	0	0	0	0	0
-	T	-	0	0	0	0	0	0	0	0	0
-	-	-	0	0	0	0	0	0	0	0	0
-	-	T	0	0	0	0	0	0	0	0	0
T	+	+	0	0	0	0	0	0	0	0	0
+	+	+	0	0	0	0	0	0	0	0	0
+	+	+	0	0	0	0	0	0	0	0	0
-	T	-	0	0	0	0	0	0	0	0	0
-	-	-	0	0	0	0	0	0	0	0	0
T	T	T	0	0	0	0	0	0	0	0	0
-	T	T	0	0	0	0	0	0	0	0	0
-	T	-	0	0	0	0	0	0	0	0	0
T	T	+	0	0	0	0	0	0	0	0	0
+	+	+	0	0	0	0	0	0	0	0	0
-	T	T	0	0	0	0	0	0	0	0	0
-	-	-	0	0	0	0	0	0	0	0	0
-	-	-	0	0	0	0	0	0	0	0	0
+	T	T	0	0	0	0	0	0	0	0	0
-	-	-	0	0	0	0	0	0	0	0	0
+	+	T	0	0	0	0	0	0	0	0	0
T	-	T	0	0	0	0	0	0	0	0	0
-	-	T	0	0	0	0	0	0	0	0	0
-	-	-	0	0	0	0	0	0	0	0	0
T	T	T	0	0	0	0	0	0	0	0	0
T	T	T	0	0	0	0	0	0	0	0	0
-	-	-	0	0	0	0	0	0	0	0	0
T	+	-	0	0	0	0	0	0	0	0	0
+	T	T	0	0	0	0	0	0	0	0	0
-	-	-	0	0	0	0	0	0	0	0	0
T	T	-	0	0	0	0	0	0	0	0	0
-	-	-	0	0	0	0	0	0	0	0	0
T	T	T	0	0	0	0	0	0	0	0	0
+	T	-	0	0	0	0	0	0	0	0	0
-	-	-	0	0	0	0	0	0	0	0	0
T	T	T	0	0	0	0	0	0	0	0	0
T	T	-	0	0	0	0	0	0	0	0	0
-	T	-	0	0	0	0	0	0	0	0	0
T	-	-	0	0	0	0	0	0	0	0	0
-	-	-	0	0	0	0	0	0	0	0	0
-	-	-	0	0	0	0	0	0	0	0	0
-	+	T	0	0	0	0	0	0	0	0	0
-	-	-	0	0	0	0	0	0	0	0	0
-	T	T	0	0	0	0	0	0	0	0	0
-	T	T	0	0	0	0	0	0	0	0	0
-	-	T	0	0	0	0	0	0	0	0	0
+	+	T	0	0	0	0	0	0	0	0	0
-	-	-	0	0	0	0	0	0	0	0	0
-	-	-	0	0	0	0	0	0	0	0	0
-	T	T	0	0	0	0	0	0	0	0	0
+	+	+	0	0	0	0	0	0	0	0	0
-	+	T	0	0	0	0	0	0	0	0	0
-	-	-	0	0	0	0	0	0	0	0	0
T	+	-	0	0	0	0	0	0	0	0	0
-	-	-	0	0	0	0	0	0	0	0	0
-	-	-	0	0	0	0	0	0	0	0	0
-	-	-	0	0	0	0	0	0	0	0	0
-	-	-	0	0	0	0	0	0	0	0	0
-	-	T	0	0	0	0	0	0	0	0	0
+	-	-	0	0	0	0	0	0	0	0	0
+	+		432	0	48	312	576	216
+	+		216	144	48	192	48	192
-	-		0	0	0	0	0	0
-			0	0	24
-			24	0	0
+			0	0	0

## Sheet: Cameroon - Yaounde
J1CCA1	J2CCA1	J3CCA1	J1KK1	J1KK2	J1KK3	J2KK1	J2KK2	J2KK3	J3KK1	J3KK2	J3KK3
+	+	+	1968	1176	696	3288	2664	3576	2832	4872	2568
+	+	+	1104	1488	1104	4560	3408	4320	1512	1344	1056
+	+	+	2232	1992	2496	2760	3696	2352	1200	456	744
+	+	+	48	120	48	648	384	912	648	480	360
+	+	+	96	240	240	168	192	216	96	120	360
+	+	+	624	552	264	1200	1536	1152	336	360	312
+	+	+	384	168	240	456	336	240	336	360	288
+	+	+	336	432	408	288	312	360	120	936	264
+	+	+	0	0	48	240	96	144	96	144	240
-	+	+	0	0	0	408	336	816	192	120	240
+	+	+	96	168	96	1344	504	1608	120	144	216
+	+	+	264	312	144	792	672	1056	96	240	168
+	+	+	48	168	168	0	0	0	96	168	168
+	+	+	72	24	0	0	0	0	48	144	144
T	-	T	0	0	0	24	72	72	72	168	120
+	+	+	0	0	0	240	168	168	120	408	96
+	T	+	72	24	24	48	72	120	0	0	96
	+	+				192	144	240	96	288	72
	+	+				24	48	0	0	72	72
+	+	+	120	48	120	48	144	48	24	0	72
+	+	+	48	96	264	0	0	0	144	144	48
+	+	+	96	216	72	72	168	72	0	24	48
-	+	+	0	0	0	48	72	24	0	0	48
T	+	+	0	0	0	48	24	24	0	0	48
-	+	-	0	0	0	0	0	0	0	0	48
T	T	T	0	0	24	0	0	24	24	48	24
+	+	+	0	24	0	0	0	0	48	0	24
	+	+				24	24	24	24	0	24
T	+	+	48	72	96	0	48	0	24	0	24
+	+	T	24	48	24	24	24	48	0	0	24
+	+	T	24	24	72	0	24	72	0	24	0
+	+	+	0	0	0	0	24	24	0	24	0
-	-	-	0	0	0	0	0	0	0	24	0
+	+	+	48	0	168	96	72		0	24	0
	+	+				24	0	48	72	0	0
+	T	-	0	0	0	0	24	0	24	0	0
-	-	-	0	0	0	0	0	0	24	0	0
+	+	+	48	48	216	312	72	216	0	0	0
+	T	T	0	0	0	0	0	48	0	0	0
+	T	+	0	0	0	24	24	24	0	0	0
T	T	T	0	0	0	24	1056	0	0	0	0
T	+	T	0	0	0	0	48	0	0	0	0
T	T	T	0	0	24	0	24	0	0	0	0
+	+	+	120	0	0	0	24	0	0	0	0
-	-	T	0	0	0	24	0	0	0	0	0
+	+	+	0	0	0	24	0	0	0	0	0
T	-	-	0	0	0	24	0	0	0	0	0
+	+	+	312	288	240	0	0	0	0	0	0
T	T	-	144	96	168	0	0	0	0	0	0
T	-	-	24	24	72	0	0	0	0	0	0
-	-	-	48	0	48	0	0	0	0	0	0
-	T	-	48	96	48	0	0	0	0	0	0
T	T	T	24	0	0	0	0	0	0	0	0
T	T	T	24	0	0	0	0	0	0	0	0
-	-	-	24	0	0	0	0	0	0	0	0
T	-	-	0	0	0	0	0	0	0	0	0
-	-	-	0	0	0	0	0	0	0	0	0
-	-	-	0	0	0	0	0	0	0	0	0
-	-	-	0	0	0	0	0	0	0	0	0
-	-	-	0	0	0	0	0	0	0	0	0
T	-	-	0	0	0	0	0	0	0	0	0
T	T	-	0	0	0	0	0	0	0	0	0
T	-	T	0	0	0	0	0	0	0	0	0
T	-	-	0	0	0	0	0	0	0	0	0
-	-	-	0	0	0	0	0	0	0	0	0
T	-	-	0	0	0	0	0	0	0	0	0
T	-	-	0	0	0	0	0	0	0	0	0
-	T	-	0	0	0	0	0	0	0	0	0
-	T	-	0	0	0	0	0	0	0	0	0
-	-	T	0	0	0	0	0	0	0	0	0
-	-	-	0	0	0	0	0	0	0	0	0
T	T	-	0	0	0	0	0	0	0	0	0
-	T	-	0	0	0	0	0	0	0	0	0
-	-	-	0	0	0	0	0	0	0	0	0
-	-	-	0	0	0	0	0	0	0	0	0
T	-	-	0	0	0	0	0	0	0	0	0
-	-	-	0	0	0	0	0	0	0	0	0
-	-	-	0	0	0	0	0	0	0	0	0
-	-	-	0	0	0	0	0	0	0	0	0
-	-	-	0	0	0	0	0	0	0	0	0
-	T	-	0	0	0	0	0	0	0	0	0
T	T	-	0	0	0	0	0	0	0	0	0
-	-	-	0	0	0	0	0	0	0	0	0
T	-	-	0	0	0	0	0	0	0	0	0
-	-	-	0	0	0	0	0	0	0	0	0
T	-	-	0	0	0	0	0	0	0	0	0
T	-	-	0	0	0	0	0	0	0	0	0
-	-	-	0	0	0	0	0	0	0	0	0
-	-	-	0	0	0	0	0	0	0	0	0
T	T	-	0	0	0	0	0	0	0	0	0
T	T	-	0	0	0	0	0	0	0	0	0
T	T		0	0	0	0	0	0	0	0	0
-	-	T	0	0	0	0	0	0	0	0	0
-	-	T	0	0	0	0	0	0	0	0	0
-	-	-	0	0	0	0	0	0	0	0	0
-	-	-	0	0	0	0	0	0	0	0	0
-	-	-	0	0	0	0	0	0	0	0	0
-	-	-	0	0	0	0	0	0	0	0	0
-	-	-	0	0	0	0	0	0	0	0	0
T	-	-	0	0	0	0	0	0	0	0	0
-	-	-	0	0	0	0	0	0	0	0	0
T	T	T	0	0	0	0	0	0	0	0	0
T	-	-	0	0	0	0	0	0	0	0	0
+	T	+	0	0	0	0	0	0	0	0	0
-	-	-	0	0	0	0	0	0	0	0	0
-	-	-	0	0	0	0	0	0	0	0	0
T	-	-	0	0	0	0	0	0	0	0	0
-	-	-	0	0	0	0	0	0	0	0	0
-	-	-	0	0	0	0	0	0	0	0	0
-	-	-	0	0	0	0	0	0	0	0	0
-	-	T	0	0	0	0	0	0	0	0	0
-	-		0	0	0	0	0	0	0	0	0
T	-	-	0	0	0	0	0	0	0	0	0
-	-	-	0	0	0	0	0	0	0	0	0
T	T	-	0	0	0	0	0	0	0	0	0
T	T	T	0	0	0	0	0	0	0	0	0
-	-	-	0	0	0	0	0	0	0	0	0
-	-	-	0	0	0	0	0	0	0	0	0
-	+	-	0	0	0	0	0	0	0	0	0
-	-	-	0	0	0	0	0	0	0	0	0
-	-	-	0	0	0	0	0	0	0	0	0
T	T	-	0	0	0	0	0	0	0	0	0
-	-	-	0	0	0	0	0	0	0	0	0
T	-	-	0	0	0	0	0	0	0	0	0
-	-	-	0	0	0	0	0	0	0	0	0
-	-	-	0	0	0	0	0	0	0	0	0
-	-	-	0	0	0	0	0	0	0	0	0
T	T	-	0	0	0	0	0	0	0	0	0
T	-	-	0	0	0	0	0	0	0	0	0
-	-	-	0	0	0	0	0	0	0	0	0
-	-	-	0	0	0	0	0	0	0	0	0
-	-	-	0	0	0	0	0	0	0	0	0
-	-	-	0	0	0	0	0	0	0	0	0
-	-	-	0	0	0	0	0	0	0	0	0
-	-	-	0	0	0	0	0	0	0	0	0
T	-	-	0	0	0	0	0	0	0	0	0
-	-	-	0	0	0	0	0	0	0	0	0
-	-	-	0	0	0	0	0	0	0	0	0
T	-	-	0	0	0	0	0	0	0	0	0
-	-	-	0	0	0	0	0	0	0	0	0
-	-	-	0	0	0	0	0	0	0	0	0
T	-	-	0	0	0	0	0	0	0	0	0
-	-	-	0	0	0	0	0	0	0	0	0
-	-	-	0	0	0	0	0	0	0	0	0
T	-	-	0	0	0	0	0	0	0	0	0
T	T	T	0	0	0	0	0	0	0	0	0
-	-	-	0	0	0	0	0	0	0	0	0
-	-	-	0	0	0	0	0	0	0	0	0
	-	-				0	0	0	0	0	0
	-	-				0	0	0	0	0	0
	-	-				0	0	0	0	0	0
	-	-				0	0	0	0	0	0
		-				0	0	0	0	0	0
	-	-				0	0	0	0	0	0
-	T	-	0	0	0	0		0	0	0	0
-	-	-	0	0	0	72	0		0	0	0
-	-	-	0	0	0	0	0		0	0	0
-	-	-	0	0	0	0	0		0	0	0
-	T	T	0	0	0	0	0		0	0	0
T	-	-	0	0	0	0	0		0	0	0
-	-	-	0	0	0	0	0		0	0	0
-	-	-	0	0	0	0	0		0	0	0
-	-	-	0	0	0	0	0		0	0	0
-	T	-	0	0	0	0	0		0	0	0
-	-	-	0	0	0	0	0		0	0	0
T	-	-	0	0	0	0	0		0	0	0
T	T	-	0	0	0	0	0		0	0	0
T	-	-	0	0	0	0	0		0	0	0
-	-	-	0	0	0	0	0		0	0	0
T		-	0	0	0				0	0	0
+		-	0	0	0				0	0	0
T		-	0	0	0				0	0	0
-		-	0	0	0				0	0	0
+		T	0	0	0				0	0	0
T		T	0	0	0				0	0	0
-		-	0	0	0				0	0	0
-		-	0	0	0				0	0	0
T			0	0	0				0	0	0
-	-	-	0	0	0	0	0	0		0	0
-	-	-	0	0		0	0	0	0		0
-	-	-	0	0	0	0	0		0		0
-	T	T							0		0
T	-		0	0	0	0	0	0			0
	+	+	96	48	72	48	24		0	0
										0
-			0	0	0				0
+	+		2592	1728	1704	3000	1920	3576
+	+		120	48	288	1200	384	840
	+					24	48	72
+	+		96	408	216	0	0	0
T	T		0	0	0	0	0	0
T	-	-	0	0	0	0	0	0
-	-		0	0	0	0	0	0
T	-		0		0	0	0	0
-	T		0	0	0	0	0	0
-	T		0	0	0	0	0	0
T	-		0	0	0	0	0	0
+	-		0	0	0	0	0	0
-	-		0	0	0	0	0	0
+	-		0	0	0	0	0	0
-	-	-	0	0	0	0	0	0
T						0	0	0
	-					0	0	0
	T					0	0	0
-	-		0	0	0	0	0
-	-		0	0	0	0	0
+			624	360	240
+			96	96	48
-			0	0	24
T			0	0	24
+			0	0	0
T			0	0	0
-			0	0	0
T			0	0	0
-			0	0	0
-			0	0	0
+			0	0	0
T			0	0	0
-			0	0	0
-			0	0	0
-			0	0	0
T			0	0	0
-			0	0	0
-			0	0	0
-			0	0	0
T			0	0	0
-			0	0	0
-			0	0	0
-			0	0	0
-			0	0	0
-			0	0	0
-			0	0	0
T			0	0	0
	-
	-
	+
	+

## Sheet: Cameroon Njombe
J1CCA1	J2CCA1	J3CCA1	J1KK1	J1KK2	J1KK3	J2KK1	J2KK2	J2KK3	J3KK1	J3KK2	J3KK3
+	+	+	792	504	408	12720	6072	10968	7440	8040	7320
+	+	+	912	1656	1416	2736	1224	528	2088	3600	3456
+	+	+	4944	4392	3720	2328	3696	2736	2616	1176	2400
+	+	+	744	792	1008	480	840	1272	576	1152	1992
+	+	+	0	0	72	4536	5424	4872	1344	1920	1080
+	+	+	168	216	264	0	144	120	744	960	1008
+	+	+	288	264	48	168	96	168	1560	504	816
+	+	+	168	192	288	120	96	24	456	360	768
+	+	+	456	432	744	1104	360	792	312	624	552
+	+	+	744	792	984	1248	456	864	456	456	504
+	+	+	48	24	24	48	96	72	384	192	456
+	+	+	504	648	792	1920	1584	1512	720	744	432
+	+	+	96	144	360	24	168	96	192	48	432
+	T	+	24	24	48	888	144	744	600	288	384
+	+	+	72	144	72	48	24	24	120	528	360
+	+	+	336	216	336	408	288	528	432	168	360
+	+	+	48	528	120	0	120	0	936	576	336
+	+	+	120	240	24	144	240	264	288	120	336
T	+	+	48	96	72	0	0	72	72	24	312
+	+	+	192	720	264	744	1176	456	96	528	240
+	+	+	96	48	24	168	504	792	576	288	240
+	+	+	0	0	0	48	0	0	480	168	240
+	+	+	96	96	120	336	72	360	0	168	240
T	+	+	984	1440	1128	336	792	600	24	312	216
+	+	T	0	0	0	0	0	0	96	120	192
T	+	-	0	0	24	0	24	0	168	96	192
+	T	+	48	0	48	48	24	24	96	96	192
T	+	T	24	0	24	0	0	0	0	0	192
-	+	+	216	96	120	0	48	24	0	96	168
+	+	+	24	120	48	0	0	0	120	48	168
+	+	+	48	96	24	0	0	0	48	216	144
+	+	T	0	48	24	0	0	0	72	48	144
+	+	+	0	24	48	48	24	0	96	0	144
+	+	+	0	0	0	96	120	216	96	144	120
+	+	+	144	216	72	240	456	384	288	96	120
+	+	+	0	0	144	0	0	24	24	24	120
+	+	+	48	24	24	24	24	24	24	168	96
+	+	+	0	24	0	0	0	0	240	96	96
+	+	+	72	72	48	48	48	72	96	48	96
T	+	+	0	0	0	24	24	24	0	24	96
+	+	+	144	48	24	120	48	48	96	288	72
T	T	-	0	24	0	0	0	0	96	192	72
+	+	+	504	384	384	504	648	384	432	168	72
+	+	+	96	264	240	48	168	120	48	96	72
+	+	+	48	72	48	24	0	72	72	72	72
+	+	+	120	24	72	24	0	0	48	24	72
+	+	+	24	48	24	0	48	0	0	24	72
+	+	+	0	0	0	72	72	96	264	0	72
+	+	+	216	96	192	0	0	24	168	0	72
+	+	+	72	144	144	72	288	120	24	0	72
T	+	T	0	0	0	0	0	0	24	0	72
+	+	+	72	24	24	312	456	600	0	0	72
+	+	+	24	0	0	0	24	24	48	192	48
+	+	+	168	144	24	48	0	24	216	168	48
+	+	+	24	0	0	0	0	0	192	96	48
T	+	T	24	0	24	0	0	24	0	48	48
+	+	+	120	48	24	0	24	0	72	24	48
+	+	+	0	0	0	0	0	0	48	24	48
+	+	+	24	0	0	0	0	24	48	0	48
+	+	+	72	48	0	0	0	0	48	0	48
T	T	+	0	72	0	48	0	0	0	0	48
+	+	+	312	240	144	0	0	0	72	96	24
+	+	+	0	0	0	0	0	0	0	48	24
+	+	+	24	96	48	24	24	72	72	24	24
+	+	+	0	0	0	0	24	24	24	24	24
T	T	+	0	0	0	24	0	24	24	0	24
T	-	T	0	0	0	0	48	24	0	0	24
+	-	+	0	0	0	24	0	24	0	0	24
T	T	T	0	0	0	0	0	24	0	0	24
T	-	+	0	0	24	0	24	0	0	0	24
T	T	-	0	0	0	0	24	0	0	0	24
+	+	+	0	0	24	0	0	0	0	0	24
+	+	+	48	216	0	0	0	0	0	0	24
-	T	-	0	0	0	0	0	0	0	0	24
-	-	-	0	0	0	0	0	0	0	0	24
-	T	-	0	0	0	0	0	0	0	0	24
+	+	+	72	24	72	120	0	48	192	336	0
-	T	+	0	0	0	0	0	0	336	312	0
+	+	+	0	24	72	0	24	96	0	96	0
T	T	T	24	0	0	24	0	0	0	72	0
T	+	+	168	96	168	552	432	216	48	48	0
+	+	+	48	0	48	0	0	48	48	48	0
+	+	+	72	48	168	24	72	48	0	48	0
+	+	+	0	0	0	24	72	0	0	48	0
-	-	-	0	48	0	0	24	0	0	48	0
+	+	+	24	0	0	0	24	0	0	48	0
T	+	+	0	0	0	0	0	0	0	48	0
+	+	+	0	24	0	0	24	0	72	24	0
+	T	+	0	0	0	0	0	0	24	24	0
+	-	-	0	0	0	0	0	72	0	24	0
T	+	+	24	24	0	0	0	0	0	24	0
-	T	T	0	24	0	0	0	0	0	24	0
+	T	+	0	0	0	0	0	0	0	24	0
-	+	T	0	0	0	0	0	0	0	24	0
+	T	+	0	0	0	0	0	0	0	24	0
+	+	T	0	0	0	0	0	0	0	24	0
+	+	+	0	0	0	0	0	0	2208	0	0
+	+	+	96	120	120	48	120	120	96	0	0
+	+	+	0	0	0	0	0	24	96	0	0
-	+	+	0	24	0	48	0	0	96	0	0
+	+	+	0	96	72	0	24	0	72	0	0
+	T	+	0	0	0	24	72	0	48	0	0
T	T	+	0	0	0	96	48	0	48	0	0
+	+	+	72	24	144	24	48	0	48	0	0
T	T	+	0	0	0	0	24	0	48	0	0
-	T	+	24	24	0	0	0	0	48	0	0
+	+	+	1728	1560	1824	624	744	648	24	0	0
T	T	+	0	48	0	0	0	24	24	0	0
+	T	-	24	0	0	0	0	0	24	0	0
T	T	+	0	0	0	0	0	0	24	0	0
T	T	-	0	0	48	384	264	960	0	0	0
+	+	+	504	288	120	240	744	576	0	0	0
+	+	+	24	0	0	120	144	144	0	0	0
+	+	+	24	0	48	168	192	72	0	0	0
-	-	-	0	0	0	0	24	48	0	0	0
T	-	-	0	0	0	0	0	48	0	0	0
+	+	+	24	72	48	48	24	24	0	0	0
+	+	+	72	48	96	24	0	24	0	0	0
+	+	+	0	24	24	0	0	24	0	0	0
+	T	T	0	0	0	48	48	0	0	0	0
+	+	+	0	0	0	24	48	0	0	0	0
T	+	+	72	24	72	0	48	0	0	0	0
-	-	-	0	0	0	0	48	0	0	0	0
T	T	-	0	0	0	0	48	0	0	0	0
-	-	-	0	0	0	24	24	0	0	0	0
T	+	+	0	0	48	0	24	0	0	0	0
T	-	-	0	0	24	0	24	0	0	0	0
+	T	+	0	24	0	0	24	0	0	0	0
T	+	+	0	0	0	0	24	0	0	0	0
-	T	T	0	0	0	0	24	0	0	0	0
-	-	-	0	0	0	0	24	0	0	0	0
-	T	T	0	0	0	0	24	0	0	0	0
+	+	+	96	216	168	24	0	0	0	0	0
T	T	+	0	24	0	24	0	0	0	0	0
T	T	+	0	24	0	24	0	0	0	0	0
+	+	+	24	0	0	24	0	0	0	0	0
+	+	+	0	0	0	24	0	0	0	0	0
+	T	+	0	0	0	24	0	0	0	0	0
T	+	+	0	0	0	24	0	0	0	0	0
T	-	T	0	0	0	24	0	0	0	0	0
T	-	-	168	240	384	0	0	0	0	0	0
T	T	+	48	144	24	0	0	0	0	0	0
T	T	-	0	120	24	0	0	0	0	0	0
+	+	+	0	24	24	0	0	0	0	0	0
-	+	T	0	0	24	0	0	0	0	0	0
-	T	T	24	48	0	0	0	0	0	0	0
T	T	+	0	48	0	0	0	0	0	0	0
+	+	+	0	24	0	0	0	0	0	0	0
T	T	T	0	24	0	0	0	0	0	0	0
T	T	-	0	24	0	0	0	0	0	0	0
T	+	T	0	24	0	0	0	0	0	0	0
-	T	-	72	0	0	0	0	0	0	0	0
+	+	+	48	0	0	0	0	0	0	0	0
+	+	+	24	0	0	0	0	0	0	0	0
+	T	T	24	0	0	0	0	0	0	0	0
-	-	-	0	0	0	0	0	0	0	0	0
T	-	-	0	0	0	0	0	0	0	0	0
T	T	+	0	0	0	0	0	0	0	0	0
-	-	T	0	0	0	0	0	0	0	0	0
-	-	T	0	0	0	0	0	0	0	0	0
T	T	+	0	0	0	0	0	0	0	0	0
T	T	-	0	0	0	0	0	0	0	0	0
-	-	-	0	0	0	0	0	0	0	0	0
-	-	T	0	0	0	0	0	0	0	0	0
-	-	T	0	0	0	0	0	0	0	0	0
-	-	-	0	0	0	0	0	0	0	0	0
T	T	T	0	0	0	0	0	0	0	0	0
T	+	+	0	0	0	0	0	0	0	0	0
-	-	-	0	0	0	0	0	0	0	0	0
T	T	T	0	0	0	0	0	0	0	0	0
-	-	-	0	0	0	0	0	0	0	0	0
T	+	T	0	0	0	0	0	0	0	0	0
+	T	+	0	0	0	0	0	0	0	0	0
-	+	T	0	0	0	0	0	0	0	0	0
-	-	T	0	0	0	0	0	0	0	0	0
+	-	-	0	0	0	0	0	0	0	0	0
+	T	+	0	0	0	0	0	0	0	0	0
-	-	-	0	0	0	0	0	0	0	0	0
T	T	T	0	0	0	0	0	0	0	0	0
-	-	T	0	0	0	0	0	0	0	0	0
-	-	T	0	0	0	0	0	0	0	0	0
-	T	T	0	0	0	0	0	0	0	0	0
-	-	-	0	0	0	0	0	0	0	0	0
T	-	-	0	0	0	0	0	0	0	0	0
T	-	-	0	0	0	0	0	0	0	0	0
T	T	+	0	0	0	0	0	0	0	0	0
-	-	T	0	0	0	0	0	0	0	0	0
-	-	-	0	0	0	0	0	0	0	0	0
-	-	-	0	0	0	0	0	0	0	0	0
-	-	-	0	0	0	0	0	0	0	0	0
-	-	-	0	0	0	0	0	0	0	0	0
+	-	+	0	0	0	0	0	0	0	0	0
+	T	+	0	0	0	0	0	0	0	0	0
-	-	-	0	0	0	0	0	0	0	0	0
+	T	+	0	0	0	0	0	0	0	0	0
T	T	T	0	0	0	0	0	0	0	0	0
-	T	T	0	0	0	0	0	0	0	0	0
-	T	-	0	0	0	0	0	0	0	0	0
-	-	-	0	0	0	0	0	0	0	0	0
+	-	-	0	0	0	0	0	0	0	0	0
-	-	-	0	0	0	0	0	0	0	0	0
T	T	T	0	0	0	0	0	0	0	0	0
-	-	-	0	0	0	0	0	0	0	0	0
-	-	-	0	0	0	0	0	0	0	0	0
-	-	-	0	0	0	0	0	0	0	0	0
-	+	T	0	0	0	0	0	0	0	0	0
-	-	-	0	0	0	0	0	0	0	0	0
T	T	T	0	0	0	0	0	0	0	0	0
-	T	T	0	0	0	0	0	0	0	0	0
T	+	-	0	0	0	0	0	0	0	0	0
-	-	-	0	0	0	0	0	0	0	0	0
+	+	+	0	0	0	0	0	0	0	0	0
-	-	+	0	0	0	0	0	0	0	0	0
-	-	T	0	0	0	0	0	0	0	0	0
T	+	+	0	0	0	0	0	0	0	0	0
T	-	-	0	0	0	0	0	0	0	0	0
T	+	+	0	0	0	0	0	0	0	0	0
-	T	-	0	0	0	0	0	0	0	0	0
-	-	T	0	0	0	0	0	0	0	0	0
-	T	-	0	0	0	0	0	0	0	0	0
-	-	-	0	0	0	0	0	0	0	0	0
T	-	-	0	0	0	0	0	0	0	0	0
T	T	T	0	0	0	0	0	0	0	0	0
T	+	+	0	0	0	0	0	0	0	0	0
-	-	T	0	0	0	0	0	0	0	0	0
T	T	-	0	0	0	0	0	0	0	0	0
-	-	-	0	0	0	0	0	0	0	0	0
-	-	-	0	0	0	0	0	0	0	0	0
T	-	-	0	0	0	0	0	0	0	0	0
-	-	-	0	0	0	0	0	0	0	0	0
T	T	T	0	0	0	0	0	0	0	0	0
-	-	-	0	0	0	0	0	0	0	0	0
T	-	-	0	0	0	0	0	0	0	0	0
+	+	+	0	0	0	0	0	0	0	0	0
-	-	-	0	0	0	0	0	0	0	0	0
T	-	T	0	0	0	0	0	0	0	0	0
+	+	T	0	0	0	0	0	0	0	0	0
T	+	T	0	0	0	0	0	0	0	0	0
-	-	-	0	0	0	0	0	0	0	0	0
-	-	-	0	0	0	0	0	0	0	0	0
-	-	T	0	0	0	0	0	0	0	0	0
-	T	T	0	0	0	0	0	0	0	0	0
T	-	-	0	0	0	0	0	0	0	0	0
-	-	T	0	0	0	0	0	0	0	0	0
-	T	T	0	0	0	0	0	0	0	0	0

## Sheet: Ethiopia - Jiga
cca1a	kk1a	kk1b	cca2a	kk2a	kk2b	cca3a	kk3a	kk3b
0	0	0	1	0	0	1	0	0
0	0	0	0	0	0	0	0	0
0	0	0	0	0	0	0	0	0
1	0	0	0	0	0	1	0	0
1	0	0	0	0	0	1	0	0
1	5	2	1	7	2	1	3	3
0	0	0	0	0	0	0	0	0
1	0	0	1	52	31	1	3	0
1	0	2	1	0	1	1	4	0
1	3	0	1	4	3	1	4	5
0	0	2	0	1	0	0	3	2
0	0	0	0	0	0	0	0	0
1	2	4	1	5	5	1	1	2
1	98	67	1	15	31	1	37	18
0	0	0	1	0	2	1	0	0
0	0	0	0	0	0	0	0	0
1	0	0	1	0	0	1	0	0
1	0	0	1	2	2	1	2	3
1	0	0	0	0	0	0	0	0
0	0	0	0	0	0	0	0	0
1	2	5	1	5	4	1	5	4
0	0	0	1	2	0	1	4	6
1	2	9	1	0	0	1	2	0
1	5	5	1	0	0	1	2	3
0	0	0	0	0	0	0	0	0
1	1	2	1	2	4	1	2	2
0	0	0	0	0	0	0	0	0
0	0	0	0	0	0	0	0	0
1	0	0	1	0	0	1	0	0
1	0	0	1	0	0	1	0	0
1	2	0	1	2	0	1	4	4
0	0	0	0	0	0	0	0	0
0	0	0	0	0	0	0	0	0
0	0	0	0	0	0	0	0	0
1	9	14	1	5	12	1	8	8
1	2	9	1	3	0	1	4	3
0	0	0	0	0	0	1	0	0
1	0	0	1	0	0	1	0	0
0	0	0	0	0	0	0	0	0
1	0	0	1	0	0	1	0	0
1	5	9	1	9	6	1	5	6
1	0	0	1	0	2	1	3	0
1	0	0	1	0	0	1	0	0
1	1	2	1	0	7	1	2	3
0	0	0	0	0	0	0	0	0
1	4	6	1	2	1	1	4	3
0	0	0	0	0	0	0	0	0
0	0	0	0	0	0	0	0	0
0	0	0	0	0	0	0	0	0
0	0	0	0	0	0	0	0	0
0	0	0	0	0	0	0	0	0
0	0	0	0	0	0	0	0	0
0	0	0	0	0	0	0	0	0
0	0	0	0	0	0	0	0	0
1	0	0	1	0	2	1	0	3
1	2	3	1	0	0	1	1	0
1	0	0	1	0	3	1	2	4
1	0	0	1	0	0	1	0	0
1	5	13	1	1	0	1	4	5
1	6	15	1	7	2	1	5	6
1	0	0	0	0	2	1	0	2
0	0	0	0	0	0	0	0	0
0	0	0	0	0	0	0	0	0
0	0	0	0	0	0	0	0	0
1	20	9	1	6	6	1	9	11
0	0	0	0	0	0	0	0	0
1	2	0	1	0	2	1	4	1
0	0	0	0	0	0	0	0	0
1	0	2	1	0	0	1	1	0
1	17	26	1	0	6	1	18	9
1	0	0	1	3	2	1	11	2
1	47	16	1	42	72	1	38	45
1	1	5	1	1	0	1	1	3
1	6	3	1	60	16	1	17	24
0	0	0	0	0	0	0	0	0
1	0	0	1	2	0	1	0	0
1	0	0	1	1	0	1	0	0
1	16	9	1	9	10	1	10	13
1	0	0	1	0	0	1	0	0
0	0	0	0	0	0	0	0	0
0	0	0	0	0	0	0	0	0
0	0	0	0	0	0	0	0	0
0	0	0	0	0	0	0	0	0
1	11	12	1	7	2	1	5	8
1	2	3	1	12	4	1	4	7
1	1	0	1	0	4	1	3	5
1	4	2	1	10	30	1	13	25
1	0	0	1	0	0	1	0	0
1	0	2	1	3	2	1	1	2
1	54	5	1	7	35	1	27	20
1	9	0	1	0	2	1	1	3
0	0	0	0	0	0	0	0	0
0	0	0	0	0	0	0	0	0
1	0	0	1	5	0	1	1	2
1	4	3	1	2	0	1	11	7
0	0	0	0	0	0	0	0	0
1	0	0	1	0	0	1	0	0
1	0	5	1	6	0	1	8	0
1	0	2	1	1	0	1	0	0
0	0	0	0	0	0	1	0	0
1	0	0	1	0	0	1	0	0
1	14	0	1	0	10	1	26	49
1	11	0	1	4	3	1	7	8
1	3	0	1	0	1	1	1	0
0	0	0	0	0	0	0	0	0
1	6	0	1	1	1	1	3	4
1	6	1	1	4	2	1	6	7
1	0	1	1	7	3	1	2	5
1	6	0	1	1	0	1	2	3
1	5	13	1	6	12	1	20	15
0	0	0	0	0	0	0	0	0
1	3	9	1	3	0	1	8	10
1	53	98	1	69	28	1	45	50
0	0	0	0	0	0	0	0	0
1	0	0	1	0	0	1	0	0
1	31	21	1	40	13	1	30	35
1	3	4	1	6	6	1	5	8
0	0	0	0	0	0	0	0	0
1	2	7	1	12	6	1	5	10
1	0	0	1	0	0	1	0	0
1	4	3	1	2	6	1	3	0
1	2	1	1	0	0	1	0	0
0	0	0	0	0	0	0	0	0
0	0	0	0	0	0	0	0	0
1	11	15	1	7	6	1	9	7
1	0	5	1	2	0	1	0	0
1	0	0	1	0	0	1	0	0
1	2	4	1	9	10	1	13	8
1	5	3	1	0	0	1	0	0
1	4	3	1	7	4	1	5	2
0	0	0	0	0	0	0	0	0
0	0	0	0	0	0	0	0	0
0	0	0	0	0	0	0	0	0
1	1	1	1	1	0	1	3	2
1	27	34	1	105	70	1	40	58
0	0	0	0	0	0	0	0	0
0	0	0	0	0	0	0	0	0
0	0	0	0	0	0	0	0	0
0	0	0	0	0	0	0	0	0
1	3	2	1	0	0	1	1	0
1	0	0	1	0	0	1	0	0
1	0	0	1	0	0	1	0	0
1	10	8	1	2	0	1	3	6
1	5	2	1	1	1	1	7	5
1	3	0	1	0	0	1	5	8
0	0	0	0	0	0	0	0	0
0	0	0	0	0	0	0	0	0
0	0	0	0	0	0	0	0	0
1	0	0	1	0	0	0	0	0
1	8	7	1	3	2	1	7	10
1	0	0	1	0	0	1	0	0
1	6	8	1	38	35	1	28	25
0	0	0	0	0	0	0	0	0
1	0	0	1	12	13	1	6	10
1	3	4	1	3	0	1	7	5
1	13	12	1	26	11	1	25	8
1	13	4	1	0	6	1	5	6
1	0	0	1	2	1	1	0	3
1	0	0	1	1	0	0	0	0
0	0	0	0	0	0	0	0	0
1	2	2	1	4	3	1	1	3
1	2	0	1	9	3	1	7	5
1	0	0	1	6	0	1	6	1
0	0	0	0	0	0	0	0	0
0	0	0	0	0	0	0	0	0
0	0	0	0	0	0	0	0	0
0	0	0	0	0	0	0	0	0
0	0	0	0	0	0	0	0	0
1	2	0	1	0	3	1	1	0
1	9	7	1	10	8	1	8	7
0	0	0	0	0	0	0	0	0
1	0	0	1	0	0	1	0	0
0	0	0	1	0	0	1	0	0
1	0	0	1	0	0	1	0	0
1	0	0	1	3	0	1	26	13
1	0	0	1	2	3	1	0	1
0	0	0	0	0	0	0	0	0
1	15	11	1	19	25	1	21	15
0	0	0	0	0	0	0	0	0
0	0	0	0	0	0	0	0	0
0	0	0	0	1	2	0	0	0
0	0	0	0	0	0	0	0	0
0	0	0	0	0	0	0	0	0
0	0	0	0	0	0	0	0	0
1	8	0	1	2	7	1	12	13
1	3	7	1	3	4	1	2	6
0	0	0	0	0	0	0	0	0
1	5	0	1	0	4	1	3	5
0	0	0	0	0	0	0	0	0
1	6	5	1	2	2	1	5	3
0	0	0	0	0	0	0	0	0
1	6	0	1	0	3	1	3	3
0	0	0	0	0	0	0	0	0
1	4	0	1	8	14	1	7	6
1	3	4	1	10	13	1	11	19
1	9	6	1	13	5	1	5	8
1	17	14	1	51	23	1	38	30
1	15	10	1	11	5	1	5	12
0	0	0	0	0	0	1	0	0
0	0	0	0	0	0	0	0	0
1	0	0	1	2	1	1	0	1
1	2	0	1	0	1	1	0	0
0	0	0	0	0	0	0	0	0
1	4	0	1	4	0	1	3	0
1	4	3	1	0	0	1	11	9
1	3	5	1	0	0	1	3	2
1	0	0	1	1	0	1	1	3
1	0	0	1	0	0	1	0	0
1	2	3	1	7	10	1	21	13
1	4	3	1	3	5	1	2	7
1	0	5	1	5	7	1	0	1
0	0	0	0	0	0	0	0	0
0	1	1	0	0	0	0	0	0
1	0	0	1	0	0	1	0	0
0	0	0	0	0	0	0	0	0
0	0	0	0	0	0	0	0	0
1	0	0	1	0	0	1	0	0
1	5	1	1	3	2	1	0	1
1	0	1	1	9	4	1	11	6
0	0	0	0	0	0	0	0	0
1	0	3	1	3	2	1	0	0
0	0	0	0	0	0	0	0	0
1	12	23	1	10	13	1	40	41
0	0	0	0	0	0	0	0	0
1	11	1	1	9	5	1	2	0
0	0	0	0	0	0	0	0	0
1	1	0	1	0	0	1	0	0
1	9	6	1	4	5	1	0	11
1	64	85	1	70	75	1	0	48
0	0	0	0	0	0	0	0	0
1	1	4	1	8	3	1	0	0
1	5	8	1	4	3	1	2	1
0	0	0	0	0	0	0	0	0
1	0	0	1	0	0	1	0	0
1	0	0	1	0	0	1	0	0
1	0	0	1	0	0	0	0	0
1	3	0	1	1	0	1	0	0
0	0	0	0	0	0	0	0	0
1	0	0	1	0	0	1	0	0
0	0	0	0	0	0	0	0	0
0	0	0	0	0	0	0	0	0
1	1	1	1	2	0	1	0	2
1	1	0	1	0	0	1	0	0
0	0	0	0	0	0	0	0	0
1	0	0	1	3	2	1	0	2
0	0	0	0	0	0	0	0	0
0	0	0	0	0	0	0	0	0
1	24	20	1	1	1	1	3	13
1	0	0	0	0	0	0	0	0
1	28	19	1	25	15	1	5	2
1	2	3	1	2	5	1	5	1
1	1	0	1	0	0	1	0	1
1	0	0	1	3	1	1	0	1
0	1	1	0	0	0	1	0	5
1	2	2	1	1	3	0	0	0
1	0	0	1	0	0	1	0	0
1	0	0	1	0	0	0	0	0
1	9	14	1	11	7	1	6	2
0	0	0	0	0	0	0	0	0
0	0	0	0	0	0	0	0	0
1	0	0	1	0	0	1	0	0
1	2	4	1	5	3	1	0	4
0	0	0	0	0	0	0	0	0
1	0	0	1	0	0	1	0	0
1	0	0	1	0	0	1	2	3
1	0	0	1	0	0	1	0	0
1	0	2	1	1	0	1	6	3
1	3	9	1	5	7	0	7	3
1	11	8	1	7	5	1	5	19
0	0	0	0	0	0	0	0	0
1	1	2	1	0	3	1	0	0
0	0	0	0	0	0	0	0	0
0	0	0	0	0	0	0	0	0
1	4	4	1	4	1	1	1	0
1	0	0	1	0	0	1	0	0
0	0	0	0	0	0	0	0	0
0	0	0	0	0	0	0	0	0
0	0	0	0	0	0	0	0	0
1	2	1	0				0	0
1	14	15	1	21	12	1	22	23
0	0	0	0	0	0	0	0	0
0	0	0	0	0	0	0	0	0
1	2	3	1	1	2	1	0	2
1	0	1	1	0	0	1	2	0
0	0	0	0	0	0	0	0	0
0	0	0	0	0	0	0	0	0
1	0	0	1	0	0	1	0	0
0	0	0	0	0	0	0	0	0
1	7	12	1	10	7	1	2	2
1	8	5	1	5	10	1	0	8
0	2	0	0	0	0	0	0	0
1	0	2	1	0	1	1	0	1
0	0	0	0	0	0	0	0	0
1	0	0	1	0	0	1	0	0
1	6	10	1	5	8	1	0	1
1	0	1	0	3	0	0	0	2
1	0	0	1	0	0	1	0	2
0	0	0	0	0	0	0	0	0
0	0	0	0	0	0	0	0	0
0	0	0	0	0	0	0	0	0
1	8	0	1	1	0	1	3	4
0	3	1	0	1	2	0	0	0
0	0	0	0	0	0	0	0	0
1	0	0	1	0	0	1	0	0
0	0	0	0	0	0	0	0	0
0	0	0	0	0	0	0	0	0
0	0	0	0	0	0	0	0	0
1	3	0	1	0	0	1	0	1
1	2	0	1	1	4	1	1	2
1	0	0	1	0	0	1	0	0
0	0	0	0	0	0	0	0	0
1	0	0	1	0	0	1	0	0
1	21	36	1	20	15	1	0	1
0	0	0	0	0	0	0	0	0
0	0	0	0	0	0	0	0	0
0	0	0	0	0	0	0	0	0
0	0	0	0	0	0	0	0	0
0	0	0	0	0	0	0	0	0
1	15	10	1	10	7	1	3	2
0	0	0	0	0	0	0	0	0

## Sheet: Ethiopia - Harbu
cca1a	kk1a	kk1b	cca2a	kk2a	kk2b	cca3a	kk3a	kk3b
1	0	0	1	0	0	2	0	0
1	1	0	1	0	3	1	2	0
1	0	0	1	3	5	1	0	0
1	0	1	1	14	8	1	0	0
2	0	0	2	0	0	2	0	0
1	2	4	1	6	7	1	6	2
1	11	4	1	1	0	1	0	0
1	0	3	1	7	11	1	0	2
1	6	3	1	2	0	1	0	0
1	0	0	1	0	0	1	0	0
1	1	2	1	2	3	1	1	0
1	16	14	1	14	5	1	12	11
1	0	1	1	0	0	1	0	0
1	2	2	1	0	0	1
1	4	2	1	0	2	1	0	0
1	0	0	1	0	0	1	0	0
1	0	5	1	0	1	1	1	1
1	0	0	2	0	0	1	0	0
2	0	0	2	0	0	2	0	0
1	4	2	1	0	1	1	3	4
2	0	0	2	0	0	2	0	0
1	0	0	1	0	0	2	0	0
2	0	0	2	0	0	2	0	0
1	0	0	1	0	0	1	0	0
1	2	2	1	0	0	1	0	0
1	0	0	1	0	0	1	0	0
1	0	0	1	0	0	1	0	0
1	0	0	1	0	0	1	0	0
1	0	0	1	0	0	1	0	0
1	0	0	1	0	0	1	1	0
1	11	10	1	2	1	1	3	3
1	9	6	1	17	13	1	13	12
1	0	0	1	0	0	1	0	0
1	3	2	1	0	1	1	1	0
1	3	1	1	3	2	1	0	0
1	1	1	1	1	0	1	0	0
1	1	0	1	0	0	1	0	0
2	0	0	2	0	0	2	0	0
1	0	0	1	11	5	2	2	3
1	10	15	1	7	16	1	31	52
2	0	0	2	0	0	2	0	0
1	1	3	1	6	10	1	0	2
1	0	0	1	7	5	1	6	7
1	1	0	1	2	5	1	2	4
2	0	0	2	0	0	2	0	0
1	7	1	1	3	4	1	16	13
1	6	10	1	2	1	1	6	10
1	1	0	1	0	1	1	39	26
1	0	0	2	0	0	2	0	1
1	2	2	1	5	7	1	2	6
1	0	0	1	0	0	1	0	0
2	0	0	2	1	2	2	0	0
1	0	0	1	0	0	1	0	0
1	0	0	1	0	0	1	0	0
1	0	0	2	0	0	1	0	0
1	0	0	1	0	0	2	0	0
1	1	2	1	0	0	1	2	1
1	0	0	1	0	0	1	1	2
1	0	0	1	2	1	1	0	0
2	0	0	2	0	0	2	0	0
1	1	3	1	0	0	1	0	2
1	0	0	2	0	0	2	0	0
2	0	0	2	0	0	2	0	0
2	0	0	2	0	0	2	0	0
1	2	9	1	3	2	1	4	5
0	0	0	2	0	0	2	0	0
1	6	6	1	8	3	1	3	3
2	0	0	2	0	0	1	0	0
2	0	0	1	0	0	1	0	0
1	0	0	1	2	0	1	0	0
1	0	0	1	0	0	2	0	0
1	1	3	1	4	1	1	3	2
1	0	1	1	3	2	1	0	0
1	1	0	1	0	0	1	2	1
2	0	0	2	0	0	2	0	0
1	4	1	1	0	3	1	1	3
1	1	0	1	0	1	1	0	0
1	2	3	1	7	3	1	4	3
1	11	28	1	11	7	1	27	30
1	0	0	1	0	0	1	0	0
1	5	2	1	5	3	1	3	3
1	0	0	1	2	4	1	0	0
1	0	1	2	0	0	1	0	0
1	1	2	1	0	0	1	2	1
2	0	0	2	0	0	2	0	0
1	0	0	2	0	0	1	0	0
1	3	1	1	0	0	1	0	0
1	1	1	1	0	1	1	1	0
2	0	0	2	2	0	2	0	0
2	0	0	2	0	0	2	0	1
1	0	0	1	0	0	1	0	0
1	0	0	1	0	0	1	0	0
1	0	0	1	0	0	2	0	0
1	1	0	1	2	3	1	0	0
2	0	0	2	0	0	2	0	0
1	0	1	1	0	0	1	0	0
1	0	0	1	32	25	1	0	0
1	1	1	1	0	0	1	0	0
1	0	0	1	0	0	1	0	0
1	0	3	1	4	2	1	0	0
1	1	0	1	1	1	1	1	0
1	5	4	1	0	0	2	0	0
1	0	0	1	0	0	1	0	0
1	0	0	1	0	1	1	0	0
1	7	0	1	1	1	1	5	4
1	2	2	1	37	23	1	37	52
1	4	9	1	0	0	1	3	2
2	0	0	1	0	0	2	0	0
1	0	0	1	0	0	1	0	0
2	0	0	1	0	0	1	0	0
2	0	1	2	0	0	1	0	0
2	0	0	1	0	0	2	0	0
2	10	8	1	0	4	1	0	6
1	4	6	1	0	0	1	5	6
1	3	2	1	4	2	1	3	2
1	0	0	1	0	0	1	0	0
1	2	4	1	0	0	1	6	2
1	2	3	1	3	5	1	4	6
1	1	0	1	0	0	1	3	0
1	1	1	1	1	4	1	0	2
1	0	0	1	0	0	1	0	0
1	0	0	1	0	0	1	0	0
1	0	0	1	1	2	1	0	0
1	4	1	1	3	4	2	4	2
2	0	0	2	0	0	2	0	0
1	0	0	1	0	1	1	0	3
2	0	1	2	0	0	2	0	0
1	1	2	1	0	0	1	1	0
1	2	7	1	2	1	1	0	0
1	0	2	1	0	0	2	0	0
1	5	1	1	6	4	1	4	6
1	0	0	1	0	1	1	0	0
1	6	9	1	9	7	1	8	12
2	0	0	1	0	0	2	0	0
1	1	1	1	1	3	1	0	0
1	21	5	1	12	4	1	15	10
1	0	2	1	0	0	1	1	0
2	1	2	2	0	0	2	41	27
1	7	5	1	0	0	1	39	31
1	2	3	1	3	0	1	0	0
2	0	0	1	0	0	1	0	0
1	0	0	1	0	0	1	0	0
2	0	0	2	0	0	2	0	0
2	0	0	1	0	0	1	0	0
2	0	0	2	0	0	2	0	0
1	0	0	1	2	5	1	0	0
1	0	0	2	0	0	2	0	0
1	0	1	1	0	0	1	0	0
1	4	1	1	3	0	1	2	0
1	0	0	1	0	4	1	0	0
1	0	0	1	0	0	1	0	0
1	1	1	1	1	1	1	1	1
1	1	0	1	0	0	1	1	0
1	1	5	1	2	1	1	1	5
1	0	0	1	0	0	1	0	0
1	0	0	1	0	0	1	0	0
2	0	0	1	0	0	2	0	0
1	1	2	1	0	0	1	0	2
1	0	0	2			1	0	0
1	0	0	1	0	0	1	2	0
2	0	0	1	0	0	1	0	0
1	3	5	1	0	0	1	0	0
2	0	0	2	0	0	2	0	0
1	0	1	2	0	0	2	0	0
2	2	1	2	2	3	2	1	2
1	2	4	1	9	7	1	8	12
1	0	0	1	0	0	1	0	0
2	4	5	2	0	0	2	0	0
2	0	0	2	0	0	1	0	0
2	0	0	2	0	0	1	0	0
2	4	3	2	2	0	2	0	1
1	0	0	1	0	0	1	0	0
1	0	0	1	0	0	1	0	0
1	0	0	1	1	0	1	0	0
2	0	1	1	0	0	2	2	2
1	3	2	1	1	0	1	1	1
1	0	3	1	1	0	1	0	0
1	0	0	1	1	0	1
1	0	0	2	2	5	2	0	0
2	0	0	2	0	0	2	0	0
2	0	0	2	0	0	2	0	0
1	1	2	1	0	0	2	0	0
2	0	0	1	0	0	2	0	0
2	0	0	2	0	0	2	0	0
1	0	2	1	1	0	1	1	3
1	0	0	1	0	0	1	0	0
2	1	0	2	0	0	2	2	1
1	0	0	1	0	0	1	0	0
1	0	2	1	2	1	1	0	0
1	2	3	1	1	0	1	1	0
1	1	2	1	0	0	1	0	0
1	1	0	2	2	0	2	0	0
1	11	12	1	2	0	1	1	0
1	0	0	1	0	0	1	0	0
1	0	0	1	1	1	1	0	0
2	0	0	2	0	0	2	0	0
1	0	0	1	0	0	1	0	0
1	12	8	1	5	7	1	3	2
1	0	0	1	0	0	1	0	0
1	0	0	1	0	0	1	0	0
2	0	0	2	0	0	2	0	0
1	0	1	1	1	0	1	0	1
2	0	0	2	0	0	2	0	0
1	0	0	1	0	0	1	0	0
1	9	7	1	11	7	1	4	6
2	0	0	2	0	0	2	0	0
2	0	0	2	0	0	2	0	0
2	0	0	2	0	0	2	0	0
1	0	1	1	0	0	1	5	1
1	0	0	2	0	0	2	0	0
2	0	0	2	0	1	1	0	0
2	0	0	1	0	0	2	0	0
1	1	6	1	2	0	1	1	4
1	5	2	1	34	27	1	30	25
1	0	0	1	0	0	1	2	2
1	0	0	1	0	3	1	2	0
2	0	0	2	0	0	2	0	0
2	0	0	2	0	0	2	0	0
1	27	23	1	33	23	1	10	17
1	2	3	1	2	0	1	3	1
2	0	0	2	0	0	2	0	0
2	0	0	2	0	0	2	0	0
1	0	0	1	0	0	1	0	0
1	2	3	1	0	0	1	0	0
1	17	12	1	6	5	1	7	4
1	6	10	1	2	1	1	3	3
2	0	0	2	0	0	2	0	0
1	6	8	1	1	1	1	2	2
1	7	0	1	1	0	2	1	1
1	6	1	1	1	2	1	1	1
1	0	0	1	1	0	2	1	1
2	0	0	2	0	0	2	0	0
1	0	1	1	0	1	1	0	0
2	0	0	2	0	0	2	0	0
1	0	0	1	1	0	1	0	1
1	3	0	1	0	0	1	0	0
1	0	0	1	0	0	1	0	0
1	0	0	1	0	0	1	0	0
1	1	2	1	0	0	1	0	0
1	0	0	1	0	0	1	0	0
1	0	0	1	0	0	1	0	0
1	10	12	1	22	17	1	6	6
1	3	4	1	2	6	1	1	2
1	1	1	1	2	0	1	1	1
1	0	0	1	0	0	1	1	1
2	0	0	1	0	0	2	0	0
2	0	0	2	0	0	2	0	0
2	0	0	2	0	0	2	0	0
1	3	2	1	0	0	1	1	2
1	2	4	1	0	0	1	1	1
1	5	6	1	30	33	1	3	3
1	1	1	1	0	0	1
1	3	5	1	5	7	1	3	5
1	0	0	1	0	0	2	0	0
2	0	0	2	0	0	2	0	0
1	0	0	1	0	0	1	1	0
2	0	0	2	0	0	2	0	0
1	0	0	2	0	0	1	0	0
1	6	8	1	1	3	1	2	2
1	3	7	1	0	0	1	0	0
1	0	0	1	0	0	1	0	0
1	1	0	2	0	0	2	0	0
2	0	0	2	0	0	2	0	0
1	3	1	1	0	0	1	0	0
2	0	0	1	0	0	1	0	0
1	0	0	1	0	0	1	0	0
1	0	0	1	1	0	1	1	3
1	0	0	1	0	0	1	0	0
1	3	3	1	1	1	1	2	2
2	0	0	2	0	0	2	0	0
2	0	0	2	0	0	2	0	0
1	0	0	1	0	0	1	1	0
1	8	5	1	9	11	1	5	2
1	0	0	1	0	0	2	3	2
1	0	0	1	0	0	1	5	2
2	0	0	2	0	0	2	0	0
2	0	0	2	0	0	2	0	0
1	0	0	1	0	0	2	0	0
2	2	0	2	0	0	2	0	0
2	0	0	2	0	0	2	0	0
1	0	0	1	0	0	1	0	0
1	0	0	1	0	0	1	0	0
1	0	0	1	0	0	2	2	2
1	1	1	1	1	0	1	5	1
1	0	0	1	0	0	2	0	0
1	0	0	1	0	0	1	0	0
1	1	1	1	2	2	1	2	6
1	12	16	1	1	4	1	0	0
2	7	8	2	2	0	2	0	0
1	0	0	1	1	0	2	0	0
2	0	0	2	0	0	2	0	0
1	1	6	1	1	0	1	0	0
2	0	0	2	0	0	2	0	0
2	0	0	2	0	0	2	0	0
2	0	0	1	0	0	2	0	0
2	0	0	2	0	0	2	0	0
2	0	0	1	0	0	2	0	0
2	0	0	2	0	0	2	0	0
2	0	0	2	0	0	2	0	0
1	1	0	1	0	0	1	0	0

[truncated: 3 more sheets: Uganda - Baseline, Uganda - F1, Uganda - Mapping]
